# Supplementary material for: A Unique Role of GATA1s in Down Syndrome Acute Megakaryocytic Leukemia Biology and Therapy
Source: PLoS One. 2011 Nov 16;6(11):e27486. doi: 10.1371/journal.pone.0027486 (PMC3217966; doi:10.1371/journal.pone.0027486)
Supplement: Table S1 — Summary of primers used for real-time RT-PCR in this study. (XLS) [file pone.0027486.s002.xls]

## Sheet: Sheet1
Table S1. Summary of primers used for real-time RT-PCR in this study.
	Primer sequences
Gene	Forward	Reverse	Size, bp	Annealing tempreature, ºC
GATA1	5'-TGGAGACTTTGAAGACAGAGCGGCTGAG-3'	5'-GAAGCTTGGGAGAGGAATAGGCTGCTGA-3	174	63
BCL-2	5'-CTGCACCTGACGCCCTTCACC-3'	5'-CACATGACCCCACCGAACTCAAAGA-3'	119	61
dCK	5'-GCTGCAGGGAAGTCAACATTTGT-3'	5'-ATCGTTCAGGTTTCTCATACATCATCTG-3'	184	63
hENT1	5'-CAGTATTTCACAAACCGCCTGGACA-3'	5'-GGCAGCATGGCACATAGGGTCAT-3'	164	63
CDA	5'-CAACATAGAAAATGCCTGCTACCCGCTG-3'	5'-AGTGGGCATTCTCTGGCTGTCAC-3'	302	68
IL1A	5'-TTGTATGTGACTGCCCAAGATGAAGA-3'	5'-GTGCCGTGAGTTTCCCAGAAGA-3'	119	58
