# Supplementary material for: A Unique Role of GATA1s in Down Syndrome Acute Megakaryocytic Leukemia Biology and Therapy
Source: PLoS One. 2011 Nov 16;6(11):e27486. doi: 10.1371/journal.pone.0027486 (PMC3217966; doi:10.1371/journal.pone.0027486)
Supplement: Table S2 — GATA1s responsive probes identified by microarray analysis. (XLSX) [file pone.0027486.s003.xlsx]

## Sheet: Yubin 1782 p001 2 FC CMK16 9534
Table S2. GATA1s responsive probes identified by microarray analysis.
Reporter Name	Accession Code	Primary Sequence Name	Sequence Description	Fold Change	P-value
A_32_P228618	NM_001003793	RBMS3	RNA binding motif, single stranded interacting protein	117.1	0
A_32_P74477	THC2609205	THC2609205	Unknown	83.0027	0
A_23_P7791	NM_024576	OGFRL1	Homo sapiens opioid growth factor receptor-like 1 (OGFRL1), mRNA [NM_024576]	67.2548	0
A_23_P43810	NM_206943	LTBP1	Homo sapiens latent transforming growth factor beta binding protein 1 (LTBP1), transcript variant 1, mRNA [NM_206943]	65.385	0
A_24_P362540	NM_003887	DDEF2	Homo sapiens development and differentiation enhancing factor 2 (DDEF2), mRNA [NM_003887]	58.7077	0
A_24_P197537	NM_003719	PDE8B	Homo sapiens phosphodiesterase 8B (PDE8B), mRNA [NM_003719]	53.9204	0
A_23_P332399	NM_016315	GULP1	Homo sapiens GULP, engulfment adaptor PTB domain containing 1 (GULP1), mRNA [NM_016315]	47.756	0
A_24_P359942	NM_014483	RBMS3	RNA binding motif, single stranded interacting protein	38.8044	0
A_23_P500844	NM_001083	PDE5A	Phosphodiesterase 5A, cGMP-specific	36.3451	0
A_23_P64617	NM_012193	FZD4	Homo sapiens frizzled homolog 4 (Drosophila) (FZD4), mRNA [NM_012193]	32.2153	0
A_23_P155979	NM_001963	EGF	Homo sapiens epidermal growth factor (beta-urogastrone) (EGF), mRNA [NM_001963]	25.0538	0
A_23_P401606	NM_005711	EDIL3	Homo sapiens EGF-like repeats and discoidin I-like domains 3 (EDIL3), mRNA [NM_005711]	23.3114	9.0928e-10
A_23_P116898	NM_000014	A2M	Homo sapiens alpha-2-macroglobulin (A2M), mRNA [NM_000014]	22.4485	0
A_23_P166633	NM_002213	ITGB5	Homo sapiens integrin, beta 5 (ITGB5), mRNA [NM_002213]	22.3913	0
A_23_P48212	NM_016509	CLEC2	Homo sapiens C-type lectin-like receptor-2 (CLEC2), mRNA [NM_016509]	21.0437	0
A_23_P126649	NM_024554	PGBD5	Homo sapiens piggyBac transposable element derived 5 (PGBD5), mRNA [NM_024554]	21.0256	1.2892e-43
A_23_P136347	NM_004447	EPS8	Homo sapiens epidermal growth factor receptor pathway substrate 8 (EPS8), mRNA [NM_004447]	20.6791	0
A_23_P371266	NM_015569	DNM3	Homo sapiens dynamin 3 (DNM3), mRNA [NM_015569]	19.2349	0
A_32_P60065	NM_004101	F2RL2	Coagulation factor II (thrombin) receptor-like 2	19.0773	0
A_32_P104841	AF087980	IGSF10	Immunoglobulin superfamily, member 10	18.6913	0
A_23_P51534	NM_003175	XCL2	Homo sapiens chemokine (C motif) ligand 2 (XCL2), mRNA [NM_003175]	18.4344	1.0135e-36
A_23_P204885	NM_022843	PCDH20	Homo sapiens protocadherin 20 (PCDH20), mRNA [NM_022843]	17.2453	0
A_23_P62890	NM_002053	GBP1	Homo sapiens guanylate binding protein 1, interferon-inducible, 67kDa (GBP1), mRNA [NM_002053]	15.5776	0
A_23_P111701	NM_004126	GNG11	Homo sapiens guanine nucleotide binding protein (G protein), gamma 11 (GNG11), mRNA [NM_004126]	15.5232	0
A_23_P333228	NM_020814	MARCH-IV	Homo sapiens membrane-associated RING-CH protein IV (MARCH-IV), mRNA [NM_020814]	15.3761	8.6194e-42
A_23_P253896	NM_001033047	NPNT	Nephronectin	15.3243	0
A_24_P54390	NM_170672	RASGRP3	Homo sapiens RAS guanyl releasing protein 3 (calcium and DAG-regulated) (RASGRP3), mRNA [NM_170672]	14.4527	0
A_24_P319923	NM_053025	MYLK	Myosin, light polypeptide kinase	14.3375	0
A_24_P45476	NM_002995	XCL1	Homo sapiens chemokine (C motif) ligand 1 (XCL1), mRNA [NM_002995]	14.2587	0
A_23_P431900	BC029406	ANGPT1	Angiopoietin 1	14.0098	0
A_23_P63541	AK001019	KIF26B	hypothetical protein FLJ10157	13.4916	0
A_23_P259851	NM_133638	ADAMTS19	Homo sapiens a disintegrin-like and metalloprotease (reprolysin type) with thrombospondin type 1 motif, 19 (ADAMTS19), mRNA [NM_133638]	13.3014	0
A_24_P208567	NM_003855	IL18R1	Homo sapiens interleukin 18 receptor 1 (IL18R1), mRNA [NM_003855]	13.2591	4.8051e-30
A_23_P259251	NM_012281	KCND2	Homo sapiens potassium voltage-gated channel, Shal-related subfamily, member 2 (KCND2), mRNA [NM_012281]	13.0013	2.856e-17
A_23_P121596	NM_002704	PPBP	Homo sapiens pro-platelet basic protein (chemokine (C-X-C motif) ligand 7) (PPBP), mRNA [NM_002704]	12.5455	0
A_23_P210109	NM_019885	CYP26B1	Homo sapiens cytochrome P450, family 26, subfamily B, polypeptide 1 (CYP26B1), mRNA [NM_019885]	12.5244	5.2601e-35
A_23_P216307	NM_004349	CBFA2T1	Runt-related transcription factor 1; translocated to, 1 (cyclin D-related)	12.2805	0
A_23_P40088	NM_003887	DDEF2	Homo sapiens development and differentiation enhancing factor 2 (DDEF2), mRNA [NM_003887]	12.0367	0
A_24_P345866	ENST00000311412	HPSE	Heparanase precursor (EC 3.2.-.-) (Heparanase-1) (Hpa1) (Endo- glucoronidase) [Contains: Heparanase 8 kDa subunit; Heparanase 50 kDa subunit]. [Source:Uniprot/SWISSPROT;Acc:Q9Y251] [ENST00000311412]	12.0343	0
A_23_P318380	NM_173574	MGC33414	Homo sapiens hypothetical protein MGC33414 (MGC33414), mRNA [NM_173574]	11.8996	3.398e-33
A_23_P137697	NM_003005	SELP	Homo sapiens selectin P (granule membrane protein 140kDa, antigen CD62) (SELP), mRNA [NM_003005]	11.8234	0
A_23_P143817	NM_053025	MYLK	Myosin, light polypeptide kinase	11.6467	0
A_32_P139551	THC2717825	THC2717825	Unknown	11.5307	1.7386e-08
A_24_P76675	NM_021647	MFAP3L	KIAA0626 gene product	11.5054	3.3514e-27
A_23_P320407	AF318318	MED12L	no opposite paired repeat protein	11.4332	0
A_23_P98455	NM_014622	LOH11CR2A	Homo sapiens loss of heterozygosity, 11, chromosomal region 2, gene A (LOH11CR2A), transcript variant 1, mRNA [NM_014622]	11.25	0
A_24_P79403	NM_002619	PF4	Homo sapiens platelet factor 4 (chemokine (C-X-C motif) ligand 4) (PF4), mRNA [NM_002619]	11.0302	0
A_23_P18539	NM_007351	MMRN1	Homo sapiens multimerin 1 (MMRN1), mRNA [NM_007351]	10.4308	0
A_32_P14222	THC2687713	THC2687713	Unknown	10.4301	0
A_23_P430818	NM_014181	HSPC159	Homo sapiens HSPC159 protein (HSPC159), mRNA [NM_014181]	10.2494	5.236e-11
A_24_P919640	U94903	CD44	CD44 molecule (Indian blood group)	10.0273	1.4808e-26
A_32_P166653	A_32_P166653	A_32_P166653	Unknown	9.9943	0
A_23_P96271	NM_003803	MYOM1	Homo sapiens myomesin 1 (skelemin) 185kDa (MYOM1), mRNA [NM_003803]	9.9901	2.913e-11
A_32_P107372	NM_002053	GBP1	Homo sapiens guanylate binding protein 1, interferon-inducible, 67kDa (GBP1), mRNA [NM_002053]	9.9684	6.4462e-40
A_23_P45025	NM_138980	MAPK10	Homo sapiens mitogen-activated protein kinase 10 (MAPK10), transcript variant 3, mRNA [NM_138980]	9.86	2.6099e-16
A_24_P889473	AF085920	ITGB3	Integrin, beta 3 (platelet glycoprotein IIIa, antigen CD61)	9.7442	0
A_23_P156550	AY358357	TREML1	Triggering receptor expressed on myeloid cells-like 1	9.6951	0
A_23_P136493	NM_013962	NRG1	Homo sapiens neuregulin 1 (NRG1), transcript variant GGF2, mRNA [NM_013962]	9.5191	0
A_24_P166527	NM_006290	TNFAIP3	Homo sapiens tumor necrosis factor, alpha-induced protein 3 (TNFAIP3), mRNA [NM_006290]	9.4291	0
A_23_P38519	NM_000212	ITGB3	Homo sapiens integrin, beta 3 (platelet glycoprotein IIIa, antigen CD61) (ITGB3), mRNA [NM_000212]	9.4275	0
A_24_P94402	NM_005378	MYCN	Homo sapiens v-myc myelocytomatosis viral related oncogene, neuroblastoma derived (avian) (MYCN), mRNA [NM_005378]	9.389	0
A_23_P160336	NM_020997	LEFTY1	Homo sapiens left-right determination factor 1 (LEFTY1), mRNA [NM_020997]	9.357	0
A_23_P143964	NM_004844	SH3BP5	Homo sapiens SH3-domain binding protein 5 (BTK-associated) (SH3BP5), mRNA [NM_004844]	9.3259	0
A_32_P178935	THC2669575	THC2669575	Unknown	9.1622	6.4556e-14
A_23_P7144	NM_001511	GRO1	Chemokine (C-X-C motif) ligand 1 (melanoma growth stimulating activity, alpha)	8.9938	3.2094e-08
A_23_P74575	NM_001766	CD1D	Homo sapiens CD1D antigen, d polypeptide (CD1D), mRNA [NM_001766]	8.979	1.7313e-36
A_32_P167103	THC2691928	THC2691928	CDC62_METMA (Q8PX44) Cell division control protein 6 homolog 2 (CDC6 homolog 2), partial (6%) [THC2691928]	8.8872	3.9584e-21
A_23_P161424	NM_032812	PLXDC2	Homo sapiens plexin domain containing 2 (PLXDC2), mRNA [NM_032812]	8.8323	0
A_23_P102950	NM_080860	TSGA2	Testis specific A2 homolog (mouse)	8.6116	0
A_24_P53778	NM_080878	ITLN2	Homo sapiens intelectin 2 (ITLN2), mRNA [NM_080878]	8.5838	2.7308e-19
A_24_P915692	NM_007350	PHLDA1	Homo sapiens pleckstrin homology-like domain, family A, member 1 (PHLDA1), mRNA [NM_007350]	8.5009	2.1318e-37
A_23_P25566	NM_004951	EBI2	Epstein-Barr virus induced gene 2 (lymphocyte-specific G protein-coupled receptor)	8.4574	0
A_23_P28334	NM_003853	IL18RAP	Homo sapiens interleukin 18 receptor accessory protein (IL18RAP), mRNA [NM_003853]	8.4311	1.2655e-31
A_23_P127547	NM_004621	TRPC6	Homo sapiens transient receptor potential cation channel, subfamily C, member 6 (TRPC6), mRNA [NM_004621]	8.3673	0
A_23_P95851	NM_024803	TUBAL3	Homo sapiens tubulin, alpha-like 3 (TUBAL3), mRNA [NM_024803]	8.192	3.2995e-22
A_24_P887092	THC2645879	THC2645879	Unknown	8.1858	2.1005e-12
A_24_P521559	NM_001075	UGT2B10	Homo sapiens UDP glycosyltransferase 2 family, polypeptide B10 (UGT2B10), mRNA [NM_001075]	8.0815	1.6186e-12
A_23_P10995	NM_014483	RBMS3	RNA binding motif, single stranded interacting protein	8.0436	0
A_24_P318656	NM_000212	ITGB3	Homo sapiens integrin, beta 3 (platelet glycoprotein IIIa, antigen CD61) (ITGB3), mRNA [NM_000212]	7.859	0
A_24_P124349	NM_025208	PDGFD	spinal cord-derived growth factor-B	7.8552	5.1618e-12
A_23_P315815	NM_004495	NRG1	Neuregulin 1	7.8481	0
A_32_P196142	A_32_P196142	A_32_P196142	Unknown	7.7835	0
A_24_P142118	NM_003246	THBS1	Homo sapiens thrombospondin 1 (THBS1), mRNA [NM_003246]	7.7337	0
A_24_P943597	NM_007350	PHLDA1	Homo sapiens pleckstrin homology-like domain, family A, member 1 (PHLDA1), mRNA [NM_007350]	7.6385	4.4186e-19
A_24_P929003	S70348	ITGB3	Integrin, beta 3 (platelet glycoprotein IIIa, antigen CD61)	7.588	0
A_32_P123629	THC2783730	THC2783730	Q96KD8_HUMAN (Q96KD8) Squamous cell carcinoma-related protein-1, partial (38%) [THC2783730]	7.5567	0
A_23_P39898	NM_005795	CALCRL	Homo sapiens calcitonin receptor-like (CALCRL), mRNA [NM_005795]	7.5314	0
A_24_P45446	NM_052941	GBP4	Homo sapiens guanylate binding protein 4 (GBP4), mRNA [NM_052941]	7.3533	3.8212e-29
A_24_P355816	NM_018370	FLJ11259	Homo sapiens hypothetical protein FLJ11259 (FLJ11259), mRNA [NM_018370]	7.294	0
A_24_P450493	THC2514262	THC2514262	Q6DQW2_MANSE (Q6DQW2) CAPA, partial (7%) [THC2514262]	7.2087	0
A_23_P256107	NM_006665	HPSE	Homo sapiens heparanase (HPSE), mRNA [NM_006665]	7.1904	0
A_24_P797678	BC004857	ZC3H7B	Homo sapiens zinc finger CCCH-type containing 7B, mRNA (cDNA clone IMAGE:3690478), partial cds.	7.1694	4.8134e-12
A_24_P135769	NM_198315	LOH11CR2A	Loss of heterozygosity, 11, chromosomal region 2, gene A	7.1017	1.0302e-40
A_23_P255952	NM_004999	MYO6	Homo sapiens myosin VI (MYO6), mRNA [NM_004999]	7.0828	2.9687e-14
A_23_P1759	NM_153206	AMICA1	Homo sapiens adhesion molecule, interacts with CXADR antigen 1 (AMICA1), mRNA [NM_153206]	6.9915	7.0431e-10
A_23_P114968	NM_020440	PTGFRN	Homo sapiens prostaglandin F2 receptor negative regulator (PTGFRN), mRNA [NM_020440]	6.9913	1.2931e-19
A_24_P157926	NM_006290	TNFAIP3	Homo sapiens tumor necrosis factor, alpha-induced protein 3 (TNFAIP3), mRNA [NM_006290]	6.945	0
A_23_P67952	S49953	MYCNOS	N-cym=DNA-binding transcriptional activator homolog {oncogene} [human, Kelly neuroblastoma cell line, mRNA, 778 nt]. [S49953]	6.9203	5.0442e-27
A_32_P171200	BU607658	BU607658	CDNA: FLJ22256 fis, clone HRC02860	6.9183	2.0432e-10
A_23_P215913	NM_203339	CLU	Clusterin	6.9047	0
A_24_P919538	U94902	CD44	CD44 molecule (Indian blood group)	6.7845	1.121e-44
A_24_P142305	NM_000517	HBA2	Hemoglobin, alpha 1	6.755	2.0992e-35
A_24_P152188	NM_198859	PRICKLE2	Homo sapiens prickle-like 2 (Drosophila) (PRICKLE2), mRNA [NM_198859]	6.7131	1.4514e-14
A_24_P185186	NM_174920	LOC201191	Homo sapiens hypothetical protein LOC201191 (LOC201191), mRNA [NM_174920]	6.7032	1.8806e-21
A_23_P336612	NM_173528	C15orf26	Homo sapiens chromosome 15 open reading frame 26 (C15orf26), mRNA [NM_173528]	6.6831	0
A_23_P30115	NM_000586	IL2	Homo sapiens interleukin 2 (IL2), mRNA [NM_000586]	6.6819	2.3843e-17
A_23_P169909	NM_004717	DGKI	Homo sapiens diacylglycerol kinase, iota (DGKI), mRNA [NM_004717]	6.6006	3.9091e-19
A_23_P210330	ENST00000238875	HSPC159	galectin-related protein (HSPC159), mRNA [Source:RefSeq_dna;Acc:NM_014181] [ENST00000238875]	6.597	5.185e-10
A_23_P206212	NM_003246	THBS1	Homo sapiens thrombospondin 1 (THBS1), mRNA [NM_003246]	6.5731	0
A_32_P76526	CA431756	EMS1	Cortactin	6.5719	0
A_23_P154522	NM_020744	MTA3	KIAA1266 protein	6.5607	0.0003
A_24_P645914	ENST00000379748	EFNA5	Ephrin-A5 precursor (EPH-related receptor tyrosine kinase ligand 7) (LERK-7) (AL-1). [Source:Uniprot/SWISSPROT;Acc:P52803] [ENST00000379748]	6.5494	1.5522e-08
A_23_P318881	NM_170601	SIAE	cytosolic sialic acid 9-O-acetylesterase homolog	6.5358	0
A_23_P391906	BC044246	KIAA1913	KIAA1913 protein	6.449	0
A_23_P501831	NM_032385	C5orf4	Homo sapiens chromosome 5 open reading frame 4 (C5orf4), mRNA [NM_032385]	6.4249	3.5855e-19
A_23_P84018	NM_000943	PPIC	Homo sapiens peptidylprolyl isomerase C (cyclophilin C) (PPIC), mRNA [NM_000943]	6.3759	0
A_23_P99163	NM_018370	FLJ11259	Homo sapiens hypothetical protein FLJ11259 (FLJ11259), mRNA [NM_018370]	6.2707	0
A_32_P98291	ENST00000361972	SFMBT2	Scm-like with four MBT domains protein 2. [Source:Uniprot/SWISSPROT;Acc:Q5VUG0] [ENST00000361972]	6.2084	0
A_23_P168306	NM_003931	WASF1	Homo sapiens WAS protein family, member 1 (WASF1), mRNA [NM_003931]	6.1984	0
A_23_P28898	NM_000933	PLCB4	Phospholipase C, beta 4	6.1308	1.2216e-36
A_32_P183656	A_32_P183656	A_32_P183656	Unknown	6.1275	9.6552e-20
A_24_P307759	NM_015180	SYNE2	Homo sapiens spectrin repeat containing, nuclear envelope 2 (SYNE2), transcript variant 1, mRNA [NM_015180]	6.1194	1.9985e-11
A_23_P81898	NM_006398	UBD	Homo sapiens ubiquitin D (UBD), mRNA [NM_006398]	6.0441	0
A_32_P40288	NM_052913	KIAA1913	Homo sapiens KIAA1913 (KIAA1913), mRNA [NM_052913]	5.9739	0
A_24_P927569	AW294929	AW294929	Transcribed locus, weakly similar to XP_517655.1 PREDICTED: similar to KIAA0825 protein [Pan troglodytes]	5.9666	0
A_23_P145984	NM_012338	TM4SF12	Homo sapiens transmembrane 4 superfamily member 12 (TM4SF12), mRNA [NM_012338]	5.9384	1.7278e-10
A_23_P216920	NM_014397	NEK6	Homo sapiens NIMA (never in mitosis gene a)-related kinase 6 (NEK6), mRNA [NM_014397]	5.9233	0
A_32_P35486	THC2679528	THC2679528	Unknown	5.9127	1.5507e-13
A_23_P363255	NM_025214	SE57-1	Homo sapiens CTCL tumor antigen se57-1 (SE57-1), mRNA [NM_025214]	5.9098	7.2299e-10
A_23_P103511	ENST00000367932	ENST00000367932	Homo sapiens cDNA FLJ43132 fis, clone CTONG3005813. [AK125122]	5.8533	3.0636e-29
A_23_P103496	NM_052941	GBP4	Homo sapiens guanylate binding protein 4 (GBP4), mRNA [NM_052941]	5.8486	7.4303e-05
A_24_P148750	NM_004844	SH3BP5	Homo sapiens SH3-domain binding protein 5 (BTK-associated) (SH3BP5), mRNA [NM_004844]	5.8227	3.7812e-23
A_23_P327022	NM_199072	HIC	Homo sapiens I-mfa domain-containing protein (HIC), mRNA [NM_199072]	5.8213	3.9454e-27
A_23_P152926	J02940	GP1BA	Human platelet glycoprotein Ib alpha chain mRNA, complete cds.	5.7913	0
A_32_P154956	A_32_P154956	A_32_P154956	Unknown	5.7623	3.0272e-16
A_23_P135948	THC2736113	THC2736113	E41LA_HUMAN (Q9HCS5) Band 4.1-like protein 4A (NBL4 protein), partial (31%) [THC2736113]	5.7	2.6901e-28
A_23_P3651	NM_005332	HBZ	Hemoglobin, zeta	5.657	0
A_23_P9135	NM_033655	CNTNAP3	Homo sapiens contactin associated protein-like 3 (CNTNAP3), mRNA [NM_033655]	5.6307	1.6157e-30
A_32_P72067	AK130576	ARHGAP24	hypothetical protein DKFZp564B1162	5.6246	2.0166e-11
A_23_P18649	CR610468	FAT4	hypothetical protein FLJ23056	5.6177	0
A_24_P381455	NM_018370	FLJ11259	Homo sapiens hypothetical protein FLJ11259 (FLJ11259), mRNA [NM_018370]	5.542	0
A_32_P117322	AV707592	AV707592	Transcribed locus	5.4899	6.0087e-13
A_23_P119478	NM_005755	EBI3	Homo sapiens Epstein-Barr virus induced gene 3 (EBI3), mRNA [NM_005755]	5.4784	4.4084e-14
A_23_P255884	NM_198252	GSN	Homo sapiens gelsolin (amyloidosis, Finnish type) (GSN), transcript variant 2, mRNA [NM_198252]	5.4493	0
A_32_P21222	DQ786194	DQ786194	Homo sapiens clone HLS_IMAGE_119768 mRNA sequence. [DQ786194]	5.44	1.6001e-06
A_23_P48414	NM_003914	CCNA1	Homo sapiens cyclin A1 (CCNA1), mRNA [NM_003914]	5.4382	3.3979e-14
A_32_P179523	DT220604	DT220604	KB-EST0005688 BPS7 Homo sapiens cDNA, mRNA sequence [DT220604]	5.3394	5.1661e-10
A_32_P226356	THC2679528	THC2679528	Unknown	5.3259	5.4796e-07
A_23_P202823	NM_005231	EMS1	Cortactin	5.2854	1.0185e-14
A_23_P128887	NM_182914	SYNE2	synaptic nuclei expressed gene 2	5.2752	1.922e-08
A_24_P652609	AK054645	CNTNAP3	cell recognition molecule CASPR3	5.2682	6.1767e-25
A_23_P102364	NM_019850	NGEF	Homo sapiens neuronal guanine nucleotide exchange factor (NGEF), mRNA [NM_019850]	5.2092	0
A_32_P114020	THC2727290	THC2727290	T32824 EST54797 Human Brain Homo sapiens cDNA 3' end similar to None., mRNA sequence [T32824]	5.1891	3.837e-20
A_32_P215003	BC044628	BC044628	Homo sapiens mRNA similar to collagen, type XVII, alpha 1 (cDNA clone IMAGE:5431129). [BC044628]	5.1244	6.4821e-13
A_24_P24263	NM_001011515	PDLIM5	LIM protein (similar to rat protein kinase C-binding enigma)	5.0902	1.4013e-45
A_23_P422724	NM_000943	PPIC	Homo sapiens peptidylprolyl isomerase C (cyclophilin C) (PPIC), mRNA [NM_000943]	5.0657	0
A_32_P108367	THC2664371	THC2664371	ALU5_HUMAN (P39192) Alu subfamily SC sequence contamination warning entry, partial (7%) [THC2664371]	5.0481	1.0819e-08
A_23_P94319	NM_014867	KIAA0711	Homo sapiens KIAA0711 gene product (KIAA0711), mRNA [NM_014867]	5.0377	1.4292e-07
A_32_P48256	DB381305	DB381305	Transcribed locus	5.0022	2.0773e-12
A_23_P205553	NM_182914	SYNE2	synaptic nuclei expressed gene 2	4.9959	4.4216e-08
A_23_P25994	NM_001008530	PRSC1	Legumain	4.9853	3.3697e-18
A_24_P918032	NM_001045545	WHDC1L1	Homo sapiens WAS protein homology region 2 domain containing 1-like 1 (WHDC1L1), mRNA [NM_001045545]	4.9568	1.4556e-38
A_23_P350689	NM_173570	ZDHHC23	Homo sapiens zinc finger, DHHC domain containing 23 (ZDHHC23), mRNA [NM_173570]	4.9156	6.7497e-09
A_32_P173662	NM_003296	CRISP2	Homo sapiens cysteine-rich secretory protein 2 (CRISP2), mRNA [NM_003296]	4.9149	1.1437e-08
A_23_P51487	NM_018284	GBP3	Homo sapiens guanylate binding protein 3 (GBP3), mRNA [NM_018284]	4.8749	0
A_23_P140277	NM_015180	SYNE2	Homo sapiens spectrin repeat containing, nuclear envelope 2 (SYNE2), transcript variant 1, mRNA [NM_015180]	4.8408	1.1171e-09
A_23_P253395	NM_006377	UNC13B	Homo sapiens unc-13 homolog B (C. elegans) (UNC13B), mRNA [NM_006377]	4.8344	7.6757e-27
A_23_P150457	NM_006691	XLKD1	Homo sapiens extracellular link domain containing 1 (XLKD1), mRNA [NM_006691]	4.8335	3.0015e-08
A_24_P298409	NM_002117	HLA-C	Major histocompatibility complex, class I, B	4.7906	0
A_24_P283225	NM_004999	MYO6	Homo sapiens myosin VI (MYO6), mRNA [NM_004999]	4.7805	3.11e-12
A_23_P134454	NM_001753	CAV1	Homo sapiens caveolin 1, caveolae protein, 22kDa (CAV1), mRNA [NM_001753]	4.773	0
A_24_P333372	ENST00000360041	ENST00000360041	T-cell receptor beta chain C region. [Source:Uniprot/SWISSPROT;Acc:P01850] [ENST00000360041]	4.7616	9.2849e-08
A_23_P411431	ENST00000282366	MTA3	Metastasis-associated protein MTA3. [Source:Uniprot/SWISSPROT;Acc:Q9BTC8] [ENST00000282366]	4.7592	1.1979e-06
A_23_P73345	NM_198159	MITF	Homo sapiens microphthalmia-associated transcription factor (MITF), transcript variant 1, mRNA [NM_198159]	4.7514	1.6777e-11
A_23_P76450	NM_007350	PHLDA1	Homo sapiens pleckstrin homology-like domain, family A, member 1 (PHLDA1), mRNA [NM_007350]	4.7181	9.7273e-05
A_23_P423012	ENST00000361200	DUSP27	Novel protein. [Source:Uniprot/SPTREMBL;Acc:Q5VZP5] [ENST00000361200]	4.7058	2.5658e-34
A_23_P52888	NM_001584	C11orf8	Homo sapiens chromosome 11 open reading frame 8 (C11orf8), mRNA [NM_001584]	4.653	4.7997e-08
A_23_P146066	NM_003114	SPAG1	Sperm associated antigen 1	4.6529	3.6988e-08
A_32_P43878	THC2676139	THC2676139	Unknown	4.6318	4.9326e-08
A_24_P180243	NM_053039	UGT2B28	UDP glucuronosyltransferase 2 family, polypeptide B28	4.5865	3.5057e-14
A_32_P117185	XM_001133381	LOC730259	PREDICTED: Homo sapiens hypothetical protein LOC730259 (LOC730259), mRNA [XM_001133381]	4.5505	0
A_23_P61945	NM_198159	MITF	Homo sapiens microphthalmia-associated transcription factor (MITF), transcript variant 1, mRNA [NM_198159]	4.541	9.3152e-22
A_24_P68908	BX640843	LOC344887	MRNA; cDNA DKFZp686B14224 (from clone DKFZp686B14224)	4.5345	0
A_23_P1461	NM_001008211	OPTN	tumor necrosis factor alpha-inducible cellular protein containing leucine zipper domains; Huntingtin interacting protein L; transcrption factor IIIA-interacting protein	4.4982	4.9876e-10
A_32_P198845	THC2651047	THC2651047	Unknown	4.4903	8.0928e-06
A_23_P421843	ENST00000285206	ENST00000285206	Sterile alpha motif domain-containing protein 14. [Source:Uniprot/SWISSPROT;Acc:Q8IZD0] [ENST00000285206]	4.4849	2.8782e-16
A_24_P54900	NM_032622	LNX	Homo sapiens ligand of numb-protein X (LNX), mRNA [NM_032622]	4.4464	2.0093e-05
A_32_P58601	AF086468	AF086468	Full length insert cDNA clone ZD86H05	4.4309	0
A_23_P74309	NM_014697	CAPON	Homo sapiens C-terminal PDZ domain ligand of neuronal nitric oxide synthase (CAPON), mRNA [NM_014697]	4.3935	3.3899e-09
A_32_P208350	NM_153046	TDRD9	Tudor domain containing 9	4.3871	6.6087e-09
A_24_P139604	NM_198930	PYHIN1	Pyrin and HIN domain family, member 1	4.3739	7.0605e-10
A_32_P11673	A_32_P11673	A_32_P11673	Unknown	4.3672	2.0612e-15
A_23_P18684	NM_004362	CLGN	Homo sapiens calmegin (CLGN), mRNA [NM_004362]	4.3601	1.2627e-08
A_23_P309599	AK026760	C20orf119	Translocase of outer mitochondrial membrane 34	4.3429	3.2504e-05
A_23_P360354	NM_152548	FLJ25333	Homo sapiens hypothetical protein FLJ25333 (FLJ25333), mRNA [NM_152548]	4.341	5.8881e-17
A_32_P701268	NM_053002	MED12L	Homo sapiens mediator of RNA polymerase II transcription, subunit 12 homolog (yeast)-like (MED12L), mRNA [NM_053002]	4.3267	5.2504e-07
A_23_P36882	NM_006183	NTS	Homo sapiens neurotensin (NTS), mRNA [NM_006183]	4.3224	0
A_23_P250156	NM_006548	IGF2BP2	IGF-II mRNA-binding protein 2	4.3206	3.4777e-15
A_23_P17695	NM_018964	SLC37A1	Homo sapiens solute carrier family 37 (glycerol-3-phosphate transporter), member 1 (SLC37A1), mRNA [NM_018964]	4.3198	1.916e-39
A_32_P4199	NM_173557	RNF152	Homo sapiens ring finger protein 152 (RNF152), mRNA [NM_173557]	4.3157	1.6625e-05
A_24_P152649	AK092522	AK092522	CDNA FLJ35203 fis, clone PLACE6018441, moderately similar to Mus musculus peroxisomal long chain acyl-CoA thioesterase Ib (Pte1b) gene	4.3054	4.4196e-23
A_23_P39735	NM_003855	IL18R1	Homo sapiens interleukin 18 receptor 1 (IL18R1), mRNA [NM_003855]	4.2775	1.1975e-08
A_32_P231617	NM_014220	TM4SF1	Homo sapiens transmembrane 4 superfamily member 1 (TM4SF1), mRNA [NM_014220]	4.2765	9.0599e-09
A_23_P69941	AK002097	FLJ11235	Homo sapiens cDNA FLJ11235 fis, clone PLACE1008488. [AK002097]	4.2571	1.1743e-08
A_24_P16702	NM_152793	Ells1	Homo sapiens hypothetical protein Ells1 (Ells1), mRNA [NM_152793]	4.2571	9.2295e-07
A_32_P124728	THC2645398	THC2645398	Unknown	4.2318	0
A_24_P184803	NM_004086	COCH	Homo sapiens coagulation factor C homolog, cochlin (Limulus polyphemus) (COCH), mRNA [NM_004086]	4.2316	9.8322e-06
A_32_P87013	NM_000584	IL8	Homo sapiens interleukin 8 (IL8), mRNA [NM_000584]	4.221	1.8408e-21
A_24_P187218	NM_020403	PCDH9	Protocadherin 9	4.2086	0
A_24_P257579	NM_022140	EPB41L4A	Homo sapiens erythrocyte membrane protein band 4.1 like 4A (EPB41L4A), mRNA [NM_022140]	4.2037	2.9659e-25
A_32_P44047	BX415272	BX415272	Transcribed locus	4.2027	1.8157e-24
A_24_P604851	AK023892	DAAM1	KIAA0666 protein	4.2013	4.5875e-17
A_23_P217763	ENST00000380635	TMSB4X	Thymosin beta-4 (T beta 4) (Fx) [Contains: Hematopoietic system regulatory peptide (Seraspenide)]. [Source:Uniprot/SWISSPROT;Acc:P62328] [ENST00000380635]	4.193	0
A_23_P111724	NM_138290	RPIB9	Homo sapiens Rap2-binding protein 9 (RPIB9), mRNA [NM_138290]	4.1832	0
A_24_P472473	THC2744021	THC2744021	Unknown	4.1737	2.8457e-05
A_24_P59327	AF280547	NRP1	Neuropilin 1	4.171	9.3474e-08
A_23_P171143	NM_003270	TM4SF6	Homo sapiens transmembrane 4 superfamily member 6 (TM4SF6), mRNA [NM_003270]	4.1594	2.4822e-08
A_24_P479510	ENST00000361080	SLC44A1	Choline transporter-like protein 1 (Solute carrier family 44 member 1) (CD92 antigen) (CDw92). [Source:Uniprot/SWISSPROT;Acc:Q8WWI5] [ENST00000361080]	4.1428	5.7703e-22
A_24_P50890	NM_002855	PVRL1	Poliovirus receptor-related 1 (herpesvirus entry mediator C; nectin)	4.1315	0
A_24_P348806	NM_175058	PLEKHA7	Homo sapiens pleckstrin homology domain containing, family A member 2 (PLEKHA7), mRNA [NM_175058]	4.1209	4.1754e-15
A_24_P83262	NM_003270	TM4SF6	Homo sapiens transmembrane 4 superfamily member 6 (TM4SF6), mRNA [NM_003270]	4.1148	1.0534e-07
A_23_P132468	NM_003615	SLC4A7	Homo sapiens solute carrier family 4, sodium bicarbonate cotransporter, member 7 (SLC4A7), mRNA [NM_003615]	4.1055	0
A_23_P41645	NM_012081	ELL2	Homo sapiens elongation factor, RNA polymerase II, 2 (ELL2), mRNA [NM_012081]	4.0736	0
A_24_P60887	NM_001146	ANGPT1	Homo sapiens angiopoietin 1 (ANGPT1), transcript variant 1, mRNA [NM_001146]	4.0697	0
A_23_P300033	NM_006206	PDGFRA	Homo sapiens platelet-derived growth factor receptor, alpha polypeptide (PDGFRA), mRNA [NM_006206]	4.0681	3.6729e-05
A_24_P406754	NM_032211	LOXL4	Homo sapiens lysyl oxidase-like 4 (LOXL4), mRNA [NM_032211]	4.0512	7.6982e-07
A_23_P1691	NM_002421	MMP1	Matrix metallopeptidase 1 (interstitial collagenase)	4.0495	5.3123e-08
A_23_P253484	NM_016228	AADAT	L-kynurenine/alpha-aminoadipate aminotransferase	4.043	1.3965e-06
A_32_P193262	BG115931	BG115931	Transcribed locus	4.0381	2.9314e-08
A_32_P120330	THC2669096	THC2669096	Unknown	4.0264	1.5644e-06
A_23_P251011	ENST00000379969	ELL2	RNA polymerase II elongation factor ELL2. [Source:Uniprot/SWISSPROT;Acc:O00472] [ENST00000379969]	4.0234	9.3328e-38
A_23_P212105	NM_001351	DAZL	Homo sapiens deleted in azoospermia-like (DAZL), mRNA [NM_001351]	4.0188	9.7057e-11
A_23_P49610	NM_032895	MGC14376	hypothetical protein MGC14376	4.018	0
A_23_P24870	NM_000610	CD44	CD44 molecule (Indian blood group)	3.9969	2.16e-12
A_24_P85619	AF363068	C18orf17	Chromosome 18 open reading frame 17	3.9931	8.9359e-14
A_23_P317729	NM_152860	SP7	Homo sapiens Sp7 transcription factor (SP7), mRNA [NM_152860]	3.9874	1.7622e-08
A_24_P772488	AB046770	PLXNA4A	KIAA1550 protein	3.9586	3.8467e-14
A_24_P409971	NM_144573	NEXN	Homo sapiens nexilin (F actin binding protein) (NEXN), mRNA [NM_144573]	3.9393	3.2188e-06
A_23_P52207	NM_012342	BAMBI	Homo sapiens BMP and activin membrane-bound inhibitor homolog (Xenopus laevis) (BAMBI), mRNA [NM_012342]	3.9254	1.4013e-45
A_23_P422204	NM_016076	PNAS-4	Homo sapiens CGI-146 protein (PNAS-4), mRNA [NM_016076]	3.9156	0
A_24_P549927	A_24_P549927	A_24_P549927	Unknown	3.9134	0
A_23_P61919	NM_004080	DGKB	Homo sapiens diacylglycerol kinase, beta 90kDa (DGKB), transcript variant 1, mRNA [NM_004080]	3.8913	3.0322e-23
A_32_P117453	BC044628	BC044628	Homo sapiens mRNA similar to collagen, type XVII, alpha 1 (cDNA clone IMAGE:5431129). [BC044628]	3.888	2.0118e-07
A_23_P342000	NM_144770	RBM11	Homo sapiens RNA binding motif protein 11 (RBM11), mRNA [NM_144770]	3.857	1.7391e-11
A_24_P119535	BC013097	C9orf80	HSPC043 protein	3.8509	1.3937e-08
A_24_P23546	NM_198956	SP8	Homo sapiens Sp8 transcription factor (SP8), transcript variant 2, mRNA [NM_198956]	3.8392	0
A_23_P325887	NM_017752	FLJ20298	Homo sapiens FLJ20298 protein (FLJ20298), transcript variant 1, mRNA [NM_017752]	3.8347	2.7183e-06
A_23_P215900	NM_016240	SCARA3	Homo sapiens scavenger receptor class A, member 3 (SCARA3), transcript variant 1, mRNA [NM_016240]	3.8268	3.8368e-29
A_24_P90216	NM_018490	LGR4	Homo sapiens leucine-rich repeat-containing G protein-coupled receptor 4 (LGR4), mRNA [NM_018490]	3.8003	2.5923e-07
A_23_P426663	NM_198159	MITF	Homo sapiens microphthalmia-associated transcription factor (MITF), transcript variant 1, mRNA [NM_198159]	3.7953	4.978e-07
A_32_P153388	NM_016315	GULP1	Homo sapiens GULP, engulfment adaptor PTB domain containing 1 (GULP1), mRNA [NM_016315]	3.7919	2.2134e-19
A_23_P85453	NM_016382	CD244	Homo sapiens CD244 natural killer cell receptor 2B4 (CD244), mRNA [NM_016382]	3.7838	0
A_32_P44394	NM_004833	AIM2	Homo sapiens absent in melanoma 2 (AIM2), mRNA [NM_004833]	3.782	1.717e-30
A_24_P917668	THC2712084	THC2712084	Q12928_HUMAN (Q12928) Thrombospondin-p50 (Fragment), partial (77%) [THC2712084]	3.7624	1.2797e-06
A_32_P168756	AA714039	C18orf17	Chromosome 18 open reading frame 17	3.7514	1.3195e-08
A_23_P219197	NM_134427	RGS3	Regulator of G-protein signalling 3	3.7355	0
A_23_P374689	NM_000817	GAD1	Homo sapiens glutamate decarboxylase 1 (brain, 67kDa) (GAD1), transcript variant GAD67, mRNA [NM_000817]	3.7266	4.3975e-36
A_24_P193295	NM_198686	RAB15	RAB15, member RAS onocogene family	3.7093	7.4711e-32
A_23_P121926	NM_005410	SEPP1	Selenoprotein P, plasma, 1	3.7021	2.5273e-06
A_32_P122128	BC028204	LOC646241	Hypothetical protein LOC646241	3.7013	0
A_24_P370702	NM_018284	GBP3	Homo sapiens guanylate binding protein 3 (GBP3), mRNA [NM_018284]	3.6906	2.3269e-29
A_32_P140139	NM_000129	F13A1	Homo sapiens coagulation factor XIII, A1 polypeptide (F13A1), mRNA [NM_000129]	3.6905	4.533e-05
A_24_P12397	NM_018965	TREM2	Homo sapiens triggering receptor expressed on myeloid cells 2 (TREM2), mRNA [NM_018965]	3.6904	1.681e-11
A_23_P30122	NM_000586	IL2	Homo sapiens interleukin 2 (IL2), mRNA [NM_000586]	3.6676	2.3682e-19
A_23_P140290	NM_021136	RTN1	Homo sapiens reticulon 1 (RTN1), transcript variant 1, mRNA [NM_021136]	3.6672	0
A_23_P125107	NM_005514	HLA-B	Major histocompatibility complex, class I, B	3.6496	1.8102e-18
A_23_P8196	NM_002395	ME1	Homo sapiens malic enzyme 1, NADP(+)-dependent, cytosolic (ME1), mRNA [NM_002395]	3.6413	1.951e-21
A_23_P136724	BX640843	LOC344887	MRNA; cDNA DKFZp686B14224 (from clone DKFZp686B14224)	3.6411	9.1302e-24
A_23_P406122	BC106086	C20orf194	lethal (3) malignant brain tumor l(3)mbt protein (Drosophila) homolog	3.6397	1.843e-08
A_24_P927798	BX437418	BX437418	MRNA; cDNA DKFZp434L201 (from clone DKFZp434L201)	3.6379	1.3745e-06
A_24_P456407	AK025234	SPTLC2	Serine palmitoyltransferase, long chain base subunit 2	3.6304	1.4701e-09
A_23_P401098	NM_153211	C18orf17	Homo sapiens chromosome 18 open reading frame 17 (C18orf17), mRNA [NM_153211]	3.6128	4.3354e-11
A_23_P113716	BC002463	HLA-C	Major histocompatibility complex, class I, B	3.6089	0
A_24_P397903	AK094296	C8orf70	CGI-62 protein	3.6073	3.465e-12
A_32_P180111	THC2660307	THC2660307	Unknown	3.5911	7.4416e-18
A_32_P215002	BC044628	BC044628	Homo sapiens mRNA similar to collagen, type XVII, alpha 1 (cDNA clone IMAGE:5431129). [BC044628]	3.5885	2.426e-14
A_23_P255444	NM_014395	DAPP1	Homo sapiens dual adaptor of phosphotyrosine and 3-phosphoinositides (DAPP1), mRNA [NM_014395]	3.5856	1.037e-08
A_24_P184799	NM_004086	COCH	Homo sapiens coagulation factor C homolog, cochlin (Limulus polyphemus) (COCH), mRNA [NM_004086]	3.5671	3.326e-05
A_23_P251002	A_23_P251002	A_23_P251002	Unknown	3.5652	2.494e-15
A_24_P391574	NM_174902	LOC143458	Homo sapiens hypothetical protein LOC143458 (LOC143458), mRNA [NM_174902]	3.5647	2.1377e-07
A_23_P26457	NM_000517	HBA2	Hemoglobin, alpha 1	3.5615	7.4269e-44
A_32_P69368	NM_002166	ID2	Homo sapiens inhibitor of DNA binding 2, dominant negative helix-loop-helix protein (ID2), mRNA [NM_002166]	3.5577	6.487e-13
A_24_P925040	NM_001233	CAV2	Caveolin 2	3.529	1.5094e-18
A_23_P86390	NM_003873	NRP1	Homo sapiens neuropilin 1 (NRP1), mRNA [NM_003873]	3.5237	1.4158e-15
A_24_P177236	NM_182527	CABP7	Homo sapiens calcium binding protein 7 (CABP7), mRNA [NM_182527]	3.5213	1.6408e-35
A_24_P213134	AF318321	SLC16A3	Solute carrier family 16 (monocarboxylic acid transporters), member 3	3.5174	0
A_32_P235358	AK124173	LOC644241	Hypothetical protein LOC644240	3.5132	0.0006
A_32_P110485	THC2691824	THC2691824	Q4STM1_TETNG (Q4STM1) Chromosome undetermined SCAF14146, whole genome shotgun sequence, partial (9%) [THC2691824]	3.4986	6.2195e-05
A_32_P146394	AI537201	TGFBR1	Transforming growth factor, beta receptor I (activin A receptor type II-like kinase, 53kDa)	3.4941	0
A_32_P111919	THC2497288	THC2497288	Unknown	3.4941	2.4908e-06
A_23_P161837	NM_130385	MRVI1	Homo sapiens murine retrovirus integration site 1 homolog (MRVI1), transcript variant 2, mRNA [NM_130385]	3.4899	3.1486e-05
A_24_P101771	A_24_P101771	A_24_P101771	Unknown	3.4818	1.5625e-29
A_24_P183150	NM_002090	CXCL3	Homo sapiens chemokine (C-X-C motif) ligand 3 (CXCL3), mRNA [NM_002090]	3.4772	0
A_23_P74290	NM_052942	GBP5	Homo sapiens guanylate binding protein 5 (GBP5), mRNA [NM_052942]	3.4743	2.1179e-07
A_24_P136838	NP500659	NP500659	GB|AL834399.1|CAD39061.1 hypothetical protein [Homo sapiens] [NP500659]	3.4736	3.796e-05
A_23_P58506	ENST00000379969	ELL2	RNA polymerase II elongation factor ELL2. [Source:Uniprot/SWISSPROT;Acc:O00472] [ENST00000379969]	3.4723	1.4164e-39
A_23_P143173	NM_032214	SLA2	Src-like adapter protein-2	3.4319	0
A_24_P34155	ENST00000358356	ENST00000358356	Runt-related transcription factor 1 (Core-binding factor, alpha 2 subunit) (CBF-alpha 2) (Acute myeloid leukemia 1 protein) (Oncogene AML-1) (Polyomavirus enhancer-binding protein 2 alpha B subunit) (PEBP2-alpha B) (PEA2-alpha B) (SL3-3 enhancer...	3.4312	0
A_23_P133606	NM_001046	SLC12A2	Homo sapiens solute carrier family 12 (sodium/potassium/chloride transporters), member 2 (SLC12A2), mRNA [NM_001046]	3.4288	6.0181e-10
A_24_P300610	BC007917	DCC1	hypothetical protein MGC14407	3.4183	1.9677e-10
A_24_P158161	NM_003114	SPAG1	Sperm associated antigen 1	3.4175	1.286e-08
A_32_P169847	THC2636507	THC2636507	Unknown	3.4097	6.069e-05
A_23_P14515	NM_152331	PTE2B	Homo sapiens peroxisomal acyl-CoA thioesterase 2B (PTE2B), mRNA [NM_152331]	3.4089	4.5653e-07
A_23_P43412	NM_018437	HEMGN	Homo sapiens hemogen (HEMGN), transcript variant 1, mRNA [NM_018437]	3.3961	0
A_24_P934135	AK092791	AK092791	Homo sapiens cDNA FLJ35472 fis, clone SMINT2007062. [AK092791]	3.3956	5.4534e-19
A_24_P253003	NM_004626	WNT11	Homo sapiens wingless-type MMTV integration site family, member 11 (WNT11), mRNA [NM_004626]	3.3875	6.211e-17
A_24_P188246	AF118081	PRO1900	PRO1900 protein	3.3783	0.0001
A_24_P942538	NM_178831	GATS	Homo sapiens opposite strand transcription unit to STAG3 (GATS), mRNA [NM_178831]	3.3745	0.0003
A_23_P24457	NM_020929	NGL-1	Homo sapiens netrin-G1 ligand (NGL-1), mRNA [NM_020929]	3.3674	0
A_23_P259071	NM_001657	AREG	Homo sapiens amphiregulin (schwannoma-derived growth factor) (AREG), mRNA [NM_001657]	3.3638	8.2703e-13
A_23_P399201	NM_183049	TMSL3	Homo sapiens thymosin-like 3 (TMSL3), mRNA [NM_183049]	3.3636	0
A_32_P209778	AA507111	ZNF532	hypothetical protein FLJ10697	3.3502	1.3414e-05
A_24_P918706	THC2534144	THC2534144	Q25F20_MACFA (Q25F20) Brain cDNA, clone: QmoA-10668, partial (98%) [THC2534144]	3.3476	0
A_23_P308603	NM_005417	SRC	Homo sapiens v-src sarcoma (Schmidt-Ruppin A-2) viral oncogene homolog (avian) (SRC), transcript variant 1, mRNA [NM_005417]	3.326	0
A_23_P219117	NM_001978	EPB49	Homo sapiens erythrocyte membrane protein band 4.9 (dematin) (EPB49), mRNA [NM_001978]	3.32	4.11e-12
A_23_P20532	AK024257	CNTNAP3	cell recognition molecule CASPR3	3.3092	5.1637e-30
A_32_P114087	BX109999	BX109999	Transcribed locus	3.2886	6.8168e-09
A_32_P147658	THC2672583	THC2672583	MMSIX2 {Mus musculus} (exp=-1; wgp=0; cg=0), partial (5%) [THC2672583]	3.2854	3.5566e-07
A_24_P418044	BC062324	HLA-A	Major histocompatibility complex, class I, A	3.2853	0
A_24_P605233	THC2620595	THC2620595	Unknown	3.2799	0.0002
A_23_P69617	NM_003728	UNC5C	Homo sapiens unc-5 homolog C (C. elegans) (UNC5C), mRNA [NM_003728]	3.2768	0.0001
A_23_P147423	NM_182920	ADAMTS9	Homo sapiens a disintegrin-like and metalloprotease (reprolysin type) with thrombospondin type 1 motif, 9 (ADAMTS9), transcript variant 1, mRNA [NM_182920]	3.2767	1.3355e-07
A_23_P37856	NM_000558	HBA1	Hemoglobin, alpha 1	3.2727	0
A_23_P357504	A_23_P357504	A_23_P357504	Unknown	3.269	0.0008
A_23_P83007	NM_203403	C9orf150	Chromosome 9 open reading frame 150	3.2645	6.4458e-13
A_23_P393163	NM_152381	CMYA3	Cardiomyopathy associated 3	3.2534	2.6202e-25
A_32_P7602	THC2563522	THC2563522	HSU03861 {Homo sapiens} (exp=-1; wgp=0; cg=0), partial (24%) [THC2563522]	3.2494	4.9535e-10
A_23_P327643	AK002200	SMC4L1	SMC4 structural maintenance of chromosomes 4-like 1 (yeast)	3.2491	0.0004
A_23_P108743	NM_152381	CMYA3	Cardiomyopathy associated 3	3.249	0
A_24_P263767	ENST00000376793	ENST00000376793	MHC class I HLA-J antigen (Fragment). [Source:Uniprot/SPTREMBL;Acc:Q30175] [ENST00000376793]	3.242	0
A_24_P582241	THC2553482	THC2553482	Q29926_HUMAN (Q29926) HLA-A protein (Fragment), partial (54%) [THC2553482]	3.2224	4.4325e-13
A_32_P77831	ENST00000381158	RAB3C	Ras-related protein Rab-3C. [Source:Uniprot/SWISSPROT;Acc:Q96E17] [ENST00000381158]	3.2205	0
A_24_P530977	A_24_P530977	A_24_P530977	Unknown	3.2198	0
A_24_P174641	NM_006457	PDLIM5	Homo sapiens PDZ and LIM domain 5 (PDLIM5), mRNA [NM_006457]	3.2119	0
A_23_P29551	NM_018306	TMEM40	Homo sapiens transmembrane protein 40 (TMEM40), mRNA [NM_018306]	3.1992	3.0407e-34
A_24_P703642	XM_001133381	LOC730259	PREDICTED: Homo sapiens hypothetical protein LOC730259 (LOC730259), mRNA [XM_001133381]	3.1958	0
A_23_P422144	NM_153690	FAM43A	Homo sapiens family with sequence similarity 43, member A (FAM43A), mRNA [NM_153690]	3.1939	4.8415e-37
A_24_P303199	NM_019087	ARFRP2	Homo sapiens ADP-ribosylation factor related protein 2 (ARFRP2), mRNA [NM_019087]	3.1923	7.8155e-39
A_32_P70983	AK021689	AK021689	Clone IMAGE:26186, mRNA sequence	3.1824	1.9466e-39
A_23_P17837	NM_145343	APOL1	Apolipoprotein L, 1	3.182	1.1729e-06
A_23_P26583	NM_032206	NOD27	Homo sapiens nucleotide-binding oligomerization domains 27 (NOD27), mRNA [NM_032206]	3.1741	0
A_32_P19797	BX115897	BX115897	CDNA FLJ37747 fis, clone BRHIP2022986	3.167	0
A_32_P111844	THC2698352	THC2698352	Unknown	3.16	8.9854e-05
A_23_P130974	NM_025249	KIAA1683	KIAA1683 protein	3.1516	2.2507e-17
A_32_P405902	AY040090	C21orf15	Homo sapiens C21orf15 protein (C21orf15) mRNA, partial cds.	3.1497	8.6311e-09
A_23_P14734	NM_015920	RPS27L	Homo sapiens ribosomal protein S27-like (RPS27L), mRNA [NM_015920]	3.1459	7.992e-11
A_23_P251104	NM_000232	SGCB	Homo sapiens sarcoglycan, beta (43kDa dystrophin-associated glycoprotein) (SGCB), mRNA [NM_000232]	3.1402	4.988e-13
A_23_P411806	NM_080546	CDW92	Homo sapiens CDW92 antigen (CDW92), mRNA [NM_080546]	3.1325	1.4047e-15
A_32_P25357	NM_004933	CDH15	Homo sapiens cadherin 15, M-cadherin (myotubule) (CDH15), mRNA [NM_004933]	3.0988	7.6718e-14
A_24_P8371	BC041772	LOC124976	Hypothetical protein LOC124976	3.0987	5.5452e-27
A_32_P55438	A_32_P55438	A_32_P55438	Unknown	3.0979	0.0002
A_23_P327156	AK094893	LOC645431	Hypothetical protein LOC645431	3.0965	0
A_23_P45338	ENST00000343571	ENST00000343571	EF-hand domain-containing family member C2. [Source:Uniprot/SWISSPROT;Acc:Q5JST6] [ENST00000343571]	3.0921	2.546e-34
A_23_P216630	NM_080546	CDW92	Homo sapiens CDW92 antigen (CDW92), mRNA [NM_080546]	3.0901	2.211e-10
A_23_P95917	BC008457	HLA-B	Major histocompatibility complex, class I, B	3.09	0
A_24_P388433	NM_002718	PPP2R3A	Homo sapiens protein phosphatase 2 (formerly 2A), regulatory subunit B'', alpha (PPP2R3A), transcript variant 1, mRNA [NM_002718]	3.0898	0
A_23_P115785	NM_145235	FANK1	Homo sapiens fibronectin type 3 and ankyrin repeat domains 1 (FANK1), mRNA [NM_145235]	3.0895	0.0002
A_32_P154484	THC2499898	THC2499898	ALU1_HUMAN (P39188) Alu subfamily J sequence contamination warning entry, partial (13%) [THC2499898]	3.0839	0
A_32_P195902	THC2657745	THC2657745	Unknown	3.0727	3.6168e-11
A_23_P217049	NM_014286	FREQ	Homo sapiens frequenin homolog (Drosophila) (FREQ), mRNA [NM_014286]	3.0725	0.0001
A_24_P916927	BC022297	DGKE	Diacylglycerol kinase, epsilon 64kDa	3.0715	3.2627e-05
A_32_P218812	AK090670	DPP6	Dipeptidyl-peptidase 6	3.0673	0.0004
A_23_P350295	ENST00000383620	ENST00000383620	major histocompatibility complex, class I, H (pseudogene) (HLA-H) on chromosome 6 [Source:RefSeq_dna;Acc:NR_001434] [ENST00000383620]	3.0602	1.013e-36
A_32_P155052	BC032684	C18orf17	Chromosome 18 open reading frame 17	3.0504	2.2215e-05
A_32_P61708	A_32_P61708	A_32_P61708	Unknown	3.0484	0.0002
A_24_P143189	NM_183049	TMSL3	Homo sapiens thymosin-like 3 (TMSL3), mRNA [NM_183049]	3.0462	0
A_24_P928052	NM_003873	NRP1	Homo sapiens neuropilin 1 (NRP1), mRNA [NM_003873]	3.0437	1.6816e-43
A_23_P42375	NM_006834	RAB32	Homo sapiens RAB32, member RAS oncogene family (RAB32), mRNA [NM_006834]	3.0396	9.0229e-07
A_24_P177553	NR_003125	LOC85391	Homo sapiens RNA, small nucleolar (LOC85391) on chromosome 11 [NR_003125]	3.0317	0
A_23_P203558	NM_000518	HBB	Homo sapiens hemoglobin, beta (HBB), mRNA [NM_000518]	3.0263	2.8952e-06
A_23_P148568	NM_017809	NXF2	Nuclear RNA export factor 2	3.0252	5.4114e-07
A_23_P314024	NM_018950	HLA-F	Homo sapiens major histocompatibility complex, class I, F (HLA-F), mRNA [NM_018950]	3.0222	3.9603e-36
A_23_P82379	NM_000722	CACNA2D1	Homo sapiens calcium channel, voltage-dependent, alpha 2/delta subunit 1 (CACNA2D1), mRNA [NM_000722]	3.0189	0
A_24_P311926	NM_002127	HLA-G	HLA-G histocompatibility antigen, class I, G	3.015	0
A_23_P27784	NM_016363	GP6	Homo sapiens glycoprotein VI (platelet) (GP6), mRNA [NM_016363]	3.0147	1.3687e-07
A_23_P74701	NM_152890	COL24A1	Homo sapiens collagen, type XXIV, alpha 1 (COL24A1), mRNA [NM_152890]	3.0049	6.2708e-42
A_24_P192914	NM_153206	AMICA1	Homo sapiens adhesion molecule, interacts with CXADR antigen 1 (AMICA1), mRNA [NM_153206]	3.0017	5.2958e-23
A_23_P402892	NM_032206	NOD27	Homo sapiens nucleotide-binding oligomerization domains 27 (NOD27), mRNA [NM_032206]	2.9993	1.7294e-23
A_32_P38445	THC2651534	THC2651534	Unknown	2.9974	2.1044e-05
A_24_P147927	NM_025184	EFHC2	Homo sapiens EF-hand domain (C-terminal) containing 2 (EFHC2), mRNA [NM_025184]	2.9961	0
A_24_P925737	ENST00000367932	ENST00000367932	Homo sapiens cDNA FLJ43132 fis, clone CTONG3005813. [AK125122]	2.9954	5.9609e-07
A_32_P234459	NR_001434	HLA-H	Homo sapiens major histocompatibility complex, class I, H (pseudogene) (HLA-H) on chromosome 6.	2.9913	0
A_32_P877	BM999343	RAB31	RAB31, member RAS oncogene family	2.991	1.6562e-06
A_32_P143980	AA464246	HLA-B	Major histocompatibility complex, class I, B	2.986	1.8037e-06
A_32_P197585	AI719574	AI719574	Transcribed locus	2.986	0.0005
A_23_P143143	NM_002166	ID2	Homo sapiens inhibitor of DNA binding 2, dominant negative helix-loop-helix protein (ID2), mRNA [NM_002166]	2.9767	5.2529e-14
A_32_P25437	NM_001046	SLC12A2	Homo sapiens solute carrier family 12 (sodium/potassium/chloride transporters), member 2 (SLC12A2), mRNA [NM_001046]	2.9766	5.908e-07
A_23_P213893	NM_032446	MEGF10	Homo sapiens MEGF10 protein (MEGF10), mRNA [NM_032446]	2.9717	0.0002
A_23_P396765	NM_173582	PGM2L1	Homo sapiens phosphoglucomutase 2-like 1 (PGM2L1), mRNA [NM_173582]	2.9626	4.5065e-15
A_23_P141688	NM_006868	RAB31	Homo sapiens RAB31, member RAS oncogene family (RAB31), mRNA [NM_006868]	2.962	3.52e-13
A_23_P216023	NM_001146	ANGPT1	Homo sapiens angiopoietin 1 (ANGPT1), transcript variant 1, mRNA [NM_001146]	2.9584	0
A_32_P14610	NM_006457	PDLIM5	Homo sapiens PDZ and LIM domain 5 (PDLIM5), mRNA [NM_006457]	2.9534	0
A_23_P125109	A_23_P125109	A_23_P125109	Unknown	2.9528	1.6598e-22
A_32_P174374	AW002417	AYTL2	hypothetical protein FLJ12443	2.952	4.2983e-07
A_24_P241183	NM_013269	OCIL	Homo sapiens lectin-like NK cell receptor (OCIL), transcript variant 1, mRNA [NM_013269]	2.9502	3.0869e-36
A_23_P200685	NM_017898	FLJ20605	Homo sapiens hypothetical protein FLJ20605 (FLJ20605), mRNA [NM_017898]	2.9501	5.381e-07
A_32_P167212	A_32_P167212	A_32_P167212	Unknown	2.9487	0.0002
A_24_P799858	BM768581	BM768581	Transcribed locus, weakly similar to XP_496299.1 PREDICTED: hypothetical protein LOC148206 [Homo sapiens]	2.9255	2.3206e-42
A_24_P374513	ENST00000334647	ENST00000334647	Thymosin-like 4. [Source:Uniprot/SPTREMBL;Acc:Q5T4B6] [ENST00000334647]	2.9171	0
A_24_P257416	NM_002089	CXCL2	Homo sapiens chemokine (C-X-C motif) ligand 2 (CXCL2), mRNA [NM_002089]	2.9142	0
A_23_P33947	NM_025184	EFHC2	Homo sapiens EF-hand domain (C-terminal) containing 2 (EFHC2), mRNA [NM_025184]	2.911	0
A_24_P706340	L10374	L10374	Human (clone CTG-A4) mRNA sequence. [L10374]	2.907	2.1647e-14
A_23_P390148	NM_014636	RALGPS1	Homo sapiens Ral GEF with PH domain and SH3 binding motif 1 (RALGPS1), mRNA [NM_014636]	2.9035	1.6464e-06
A_32_P180385	THC2536579	THC2536579	Unknown	2.9028	4.359e-19
A_32_P122703	NM_173582	PGM2L1	Homo sapiens phosphoglucomutase 2-like 1 (PGM2L1), mRNA [NM_173582]	2.8935	1.3635e-19
A_23_P897	NM_023938	SARG	Homo sapiens specifically androgen-regulated protein (SARG), mRNA [NM_023938]	2.8884	4.4559e-31
A_32_P197340	ENST00000375280	LOC285141	full-length cDNA clone CS0DI052YH08 of Placenta Cot 25-normalized of Homo sapiens (human). [CR596204]	2.8783	5.8424e-28
A_23_P70539	CR598918	HLA-B	Major histocompatibility complex, class I, B	2.8742	1.4013e-45
A_23_P210176	NM_000210	ITGA6	Homo sapiens integrin, alpha 6 (ITGA6), mRNA [NM_000210]	2.8738	6.0409e-07
A_23_P379649	NM_001003940	BMF	Bcl-2 modifying factor	2.8733	0
A_24_P270829	NM_000173	GP1BA	Homo sapiens glycoprotein Ib (platelet), alpha polypeptide (GP1BA), mRNA [NM_000173]	2.8607	2.179e-21
A_24_P936272	ENST00000383518	ENST00000383518	HLA class I histocompatibility antigen, Cw-5 alpha chain precursor (MHC class I antigen Cw*5). [Source:Uniprot/SWISSPROT;Acc:Q9TNN7] [ENST00000383518]	2.8499	8.8961e-39
A_23_P431252	NM_032505	TA-KRP	Homo sapiens T-cell activation kelch repeat protein (TA-KRP), mRNA [NM_032505]	2.8473	0
A_23_P70534	NM_001003693	C6orf21	Chromosome 6 open reading frame 21	2.8408	1.174e-06
A_23_P44734	NM_032557	USP38	Homo sapiens ubiquitin specific protease 38 (USP38), mRNA [NM_032557]	2.8375	0
A_23_P315364	NM_002089	CXCL2	Homo sapiens chemokine (C-X-C motif) ligand 2 (CXCL2), mRNA [NM_002089]	2.8373	0
A_24_P316059	XR_019199	LOC441768	PREDICTED: Homo sapiens similar to RAB31, member RAS oncogene family (LOC441768), mRNA [XR_019199]	2.8369	1.4999e-15
A_23_P351204	NM_172109	KCNQ2	Potassium voltage-gated channel, KQT-like subfamily, member 2	2.8317	1.6606e-25
A_24_P799680	A_24_P799680	A_24_P799680	Unknown	2.8246	2.8065e-24
A_24_P703462	THC2558098	THC2558098	Q9CY34_MOUSE (Q9CY34) 13 days embryo liver cDNA, RIKEN full-length enriched library, clone:2510010F15 product:NEDD8-conjugating enzyme NCE2 (Ubiquitin-conjugating enzyme E2) (Ubiquitin-protein ligase) (Ubiquitin carrier protein) homolog (NE , partial...	2.8196	0
A_23_P170761	NM_006457	PDLIM5	Homo sapiens PDZ and LIM domain 5 (PDLIM5), mRNA [NM_006457]	2.814	5.8727e-37
A_24_P169634	NR_002724	MBL1P1	Homo sapiens mannose-binding lectin (protein A) 1, pseudogene 1 (MBL1P1) on chromosome 10.	2.8129	0.0005
A_24_P236799	NM_006868	RAB31	Homo sapiens RAB31, member RAS oncogene family (RAB31), mRNA [NM_006868]	2.8127	2.0162e-11
A_23_P356616	NM_145804	ABTB2	Homo sapiens ankyrin repeat and BTB (POZ) domain containing 2 (ABTB2), mRNA [NM_145804]	2.811	3.1162e-15
A_32_P178746	THC2657989	THC2657989	ALU2_HUMAN (P39189) Alu subfamily SB sequence contamination warning entry, partial (27%) [THC2657989]	2.7947	0
A_23_P87346	NM_000519	HBD	Homo sapiens hemoglobin, delta (HBD), mRNA [NM_000519]	2.7943	0
A_24_P611114	AK000995	LOC643376	Similar to Kelch-like protein 2	2.7781	5.1163e-06
A_23_P408353	NM_002116	HLA-A	Major histocompatibility complex, class I, A	2.7775	0
A_24_P669443	THC2520630	THC2520630	Unknown	2.768	1.1109e-34
A_32_P104300	BE703537	C5orf22	hypothetical protein FLJ11193	2.7671	1.0072e-06
A_23_P35114	NM_016274	CKIP-1	Homo sapiens CK2 interacting protein 1; HQ0024c protein (CKIP-1), mRNA [NM_016274]	2.7667	5.3806e-11
A_23_P88099	AK092739	MCF2L	Homo sapiens cDNA FLJ35420 fis, clone SMINT2001183.	2.7651	0
A_24_P201381	NM_152429	C10orf13	Homo sapiens chromosome 10 open reading frame 13 (C10orf13), mRNA [NM_152429]	2.7638	1.8454e-35
A_23_P106103	NM_004857	AKAP5	Homo sapiens A kinase (PRKA) anchor protein 5 (AKAP5), mRNA [NM_004857]	2.7623	8.8877e-05
A_23_P381431	NM_030769	NPL	Homo sapiens N-acetylneuraminate pyruvate lyase (dihydrodipicolinate synthase) (NPL), mRNA [NM_030769]	2.7578	0
A_23_P217621	NM_024885	TAF7L	Homo sapiens TAF7-like RNA polymerase II, TATA box binding protein (TBP)-associated factor, 50kDa (TAF7L), mRNA [NM_024885]	2.754	0.0003
A_23_P18493	NM_080685	PTPN13	Homo sapiens protein tyrosine phosphatase, non-receptor type 13 (APO-1/CD95 (Fas)-associated phosphatase) (PTPN13), transcript variant 4, mRNA [NM_080685]	2.7532	7.5744e-34
A_23_P146512	NM_016548	GOLPH2	Golgi phosphoprotein 2	2.751	5.6351e-05
A_32_P199429	THC2665663	THC2665663	Unknown	2.7502	1.2082e-21
A_23_P44794	NM_138453	RAB3C	Homo sapiens RAB3C, member RAS oncogene family (RAB3C), mRNA [NM_138453]	2.7495	1.7438e-12
A_24_P179244	AK092594	TPM1	Tropomyosin 1 (alpha)	2.747	3.9506e-07
A_23_P31443	NM_014590	ERVWE1	Homo sapiens endogenous retroviral family W, env(C7), member 1 (syncytin) (ERVWE1), mRNA.	2.7365	1.1087e-06
A_32_P11058	THC2646969	THC2646969	ALU1_HUMAN (P39188) Alu subfamily J sequence contamination warning entry, partial (17%) [THC2646969]	2.7333	5.6052e-45
A_24_P161933	CR608347	HLA-B	Major histocompatibility complex, class I, B	2.7296	6.6688e-25
A_24_P319711	NM_000817	GAD1	Homo sapiens glutamate decarboxylase 1 (brain, 67kDa) (GAD1), transcript variant GAD67, mRNA [NM_000817]	2.726	8.1079e-42
A_24_P122337	NM_080737	SYTL4	Homo sapiens synaptotagmin-like 4 (granuphilin-a) (SYTL4), mRNA [NM_080737]	2.7251	1.2445e-16
A_23_P256047	NM_022096	ANKRD5	hypothetical protein FLJ21669	2.7204	5.0447e-44
A_32_P56249	THC2670291	THC2670291	UBP30_HUMAN (Q70CQ3) Ubiquitin carboxyl-terminal hydrolase 30 (Ubiquitin thioesterase 30) (Ubiquitin-specific-processing protease 30) (Deubiquitinating enzyme 30) , partial (5%) [THC2670291]	2.7057	0.0002
A_23_P6034	NM_030773	TUBB1	Homo sapiens tubulin, beta 1 (TUBB1), mRNA [NM_030773]	2.7039	5.6052e-45
A_24_P105747	NM_001039569	AP1S3	Adaptor-related protein complex 1, sigma 3 subunit	2.7013	1.0326e-05
A_23_P338113	NP101106	NP101106	GB|AL022723.4|CAB46615.1 dJ377H14.3 (PUTATIVE novel MHC class 1 protein) [NP101106]	2.6949	1.1062e-23
A_32_P91042	CR610374	PSMB7	Proteasome (prosome, macropain) subunit, beta type, 7	2.6908	0
A_24_P912382	ENST00000376802	LOC649853	HLA class I histocompatibility antigen, alpha chain G precursor (HLA G antigen). [Source:Uniprot/SWISSPROT;Acc:P17693] [ENST00000376802]	2.6906	0
A_23_P44724	NM_001321	CSRP2	Homo sapiens cysteine and glycine-rich protein 2 (CSRP2), mRNA [NM_001321]	2.69	6.851e-09
A_24_P335048	NM_018017	C10orf118	Homo sapiens chromosome 10 open reading frame 118 (C10orf118), mRNA [NM_018017]	2.6867	4.7757e-08
A_24_P189533	ENST00000278505	ENDOD1	Endonuclease domain-containing 1 protein precursor (EC 3.1.30.-). [Source:Uniprot/SWISSPROT;Acc:O94919] [ENST00000278505]	2.684	6.4579e-24
A_24_P376483	NM_002116	HLA-A	Major histocompatibility complex, class I, A	2.6834	2.3146e-33
A_24_P917783	X90978	RUNX1	Runt-related transcription factor 1 (acute myeloid leukemia 1; aml1 oncogene)	2.6808	3.1085e-36
A_23_P335239	NM_207123	GAB1	Homo sapiens GRB2-associated binding protein 1 (GAB1), transcript variant 1, mRNA [NM_207123]	2.677	2.4657e-31
A_32_P226941	THC2689491	THC2689491	Unknown	2.6767	4.4474e-06
A_24_P42373	AK096256	LOC645454	Hypothetical protein LOC645454	2.6763	7.3009e-23
A_23_P371215	NM_012092	ICOS	Homo sapiens inducible T-cell co-stimulator (ICOS), mRNA [NM_012092]	2.6725	9.935e-06
A_23_P201445	NM_016076	PNAS-4	Homo sapiens CGI-146 protein (PNAS-4), mRNA [NM_016076]	2.6713	0
A_23_P7882	BC022217	C6orf85	hypothetical protein FLJ22174	2.6686	3.443e-42
A_32_P168812	AK094525	AK094525	CDNA FLJ37206 fis, clone BRALZ2007545	2.659	0.0002
A_24_P226267	NM_000806	GABRA1	Homo sapiens gamma-aminobutyric acid (GABA) A receptor, alpha 1 (GABRA1), mRNA [NM_000806]	2.6584	0
A_32_P47019	THC2656116	THC2656116	Unknown	2.6566	3.3896e-15
A_24_P368575	NM_003615	SLC4A7	Homo sapiens solute carrier family 4, sodium bicarbonate cotransporter, member 7 (SLC4A7), mRNA [NM_003615]	2.6513	0
A_24_P363408	NM_012259	HEY2	Homo sapiens hairy/enhancer-of-split related with YRPW motif 2 (HEY2), mRNA [NM_012259]	2.6493	0.0002
A_23_P88347	NM_006832	PLEKHC1	Homo sapiens pleckstrin homology domain containing, family C (with FERM domain) member 1 (PLEKHC1), mRNA [NM_006832]	2.6484	9.9538e-06
A_24_P643601	AF150379	AF150379	Transcribed locus	2.6466	2.1921e-09
A_23_P133739	NM_148959	EXOC2	hypothetical protein FLJ11026	2.6441	0
A_32_P113380	THC2677659	THC2677659	Unknown	2.6435	2.6401e-13
A_24_P109766	AK094893	LOC645431	Hypothetical protein LOC645431	2.64	5.7806e-08
A_24_P308079	NM_152381	CMYA3	Cardiomyopathy associated 3	2.6382	0.0003
A_23_P66137	NM_014587	SOX8	SRY (sex determining region Y)-box 8	2.6301	1.6236e-20
A_23_P501722	NM_139022	PHEMX	Homo sapiens pan-hematopoietic expression (PHEMX), transcript variant 1, mRNA [NM_139022]	2.6277	0
A_32_P161836	THC2588392	THC2588392	1ABW_A Chain A, Deoxy Rhb1.1 (Recombinant Hemoglobin). {synthetic construct} (exp=-1; wgp=-1; cg=-1), partial (18%) [THC2588392]	2.6268	0.0005
A_23_P104624	ENST00000278505	ENDOD1	Endonuclease domain-containing 1 protein precursor (EC 3.1.30.-). [Source:Uniprot/SWISSPROT;Acc:O94919] [ENST00000278505]	2.6221	4.3828e-16
A_23_P48535	NM_001030055	ARHGAP5	Rho GTPase activating protein 5	2.6203	0
A_32_P225355	NM_182485	CPEB2	Cytoplasmic polyadenylation element binding protein 2	2.6193	4.732e-31
A_23_P148541	NM_139250	CTAG1	Cancer/testis antigen 1B	2.6167	0.0004
A_24_P75190	NM_000519	HBD	Homo sapiens hemoglobin, delta (HBD), mRNA [NM_000519]	2.614	5.5071e-38
A_23_P210763	NM_000214	JAG1	Homo sapiens jagged 1 (Alagille syndrome) (JAG1), mRNA [NM_000214]	2.6081	7.976e-20
A_24_P722068	THC2540767	THC2540767	Q6DES3_XENTR (Q6DES3) LOC447963 protein (Fragment), partial (11%) [THC2540767]	2.608	6.5777e-05
A_23_P7313	NM_001040058	SPP1	Homo sapiens secreted phosphoprotein 1 (osteopontin, bone sialoprotein I, early T-lymphocyte activation 1) (SPP1), transcript variant 1, mRNA [NM_001040058]	2.608	1.7196e-12
A_23_P95790	NM_017625	ITLN1	Homo sapiens intelectin 1 (galactofuranose binding) (ITLN1), mRNA [NM_017625]	2.6079	2.5033e-07
A_32_P27135	CR613436	PCDH9	Protocadherin 9	2.6073	1.9619e-11
A_24_P102293	NM_015567	SLITRK5	KIAA0918 protein	2.6013	2.1263e-25
A_32_P137920	NM_001010892	RSHL3	Radial spokehead-like 3	2.6003	9.9543e-07
A_23_P212854	NM_002100	GYPB	Glycophorin B (MNS blood group)	2.5974	1.0047e-17
A_23_P1904	NM_000139	MS4A2	Homo sapiens membrane-spanning 4-domains, subfamily A, member 2 (Fc fragment of IgE, high affinity I, receptor for; beta polypeptide) (MS4A2), mRNA [NM_000139]	2.5972	0
A_23_P360777	NM_013960	NRG1	Neuregulin 1	2.5916	3.8248e-05
A_24_P813730	A_24_P813730	A_24_P813730	Unknown	2.5909	0.0001
A_24_P113674	NM_005514	HLA-B	Major histocompatibility complex, class I, B	2.5852	2.1609e-26
A_23_P46315	NM_198459	DENND2C	DENN/MADD domain containing 2C	2.5851	0.0008
A_23_P19142	NM_004137	KCNMB1	Homo sapiens potassium large conductance calcium-activated channel, subfamily M, beta member 1 (KCNMB1), mRNA [NM_004137]	2.5821	2.4257e-08
A_32_P22355	THC2650011	THC2650011	Unknown	2.5806	1.1979e-15
A_24_P176079	NM_006646	WASF3	Homo sapiens WAS protein family, member 3 (WASF3), mRNA [NM_006646]	2.5781	6.8603e-07
A_23_P116195	BQ706262	BQ706262	Transcribed locus	2.5773	1.0568e-39
A_23_P404162	NM_014707	HDAC9	histone deacetylase 7B	2.575	6.4537e-08
A_32_P222695	NM_001001669	FLJ41603	FLJ41603 protein	2.5726	3.2997e-14
A_32_P164916	AL833005	LOC728965	MRNA; cDNA DKFZp666D074 (from clone DKFZp666D074)	2.572	1.3651e-06
A_23_P365086	NM_022096	ANKRD5	hypothetical protein FLJ21669	2.5704	2.6827e-09
A_32_P157228	NM_015446	ELYS	Homo sapiens ELYS transcription factor-like protein TMBS62 (ELYS), mRNA [NM_015446]	2.5674	5.1248e-20
A_23_P88106	AK092739	MCF2L	Homo sapiens cDNA FLJ35420 fis, clone SMINT2001183.	2.5657	8.3897e-20
A_32_P152437	BC033829	AKAP12	A kinase (PRKA) anchor protein (gravin) 12	2.5646	1.5599e-05
A_32_P68443	BE714307	BE714307	PM4-HT0723-010600-001-h11 HT0723 Homo sapiens cDNA, mRNA sequence.	2.5642	3.0412e-13
A_32_P71310	AK093532	HSD17B12	steroid dehydrogenase homolog	2.5641	3.2297e-11
A_32_P889903	AF086288	AF086288	Homo sapiens full length insert cDNA clone ZD48A05 [AF086288]	2.5625	0.0002
A_23_P106617	NM_021197	WFDC1	Homo sapiens WAP four-disulfide core domain 1 (WFDC1), mRNA [NM_021197]	2.5624	3.4113e-13
A_24_P84370	AK024470	TSPAN9	tetraspan transmembrane 4 super family	2.5519	6.7696e-15
A_23_P72668	NM_004657	SDPR	Homo sapiens serum deprivation response (phosphatidylserine binding protein) (SDPR), mRNA [NM_004657]	2.5482	3.0638e-37
A_32_P58437	THC2656116	THC2656116	Unknown	2.5474	1.2672e-19
A_23_P123943	NM_004612	TGFBR1	Homo sapiens transforming growth factor, beta receptor I (activin A receptor type II-like kinase, 53kDa) (TGFBR1), mRNA [NM_004612]	2.5426	3.4658e-41
A_24_P769096	AK024938	EEF1G	Eukaryotic translation elongation factor 1 gamma	2.5406	0.0005
A_24_P769529	NM_001004317	LIN28B	Lin-28 homolog B (C. elegans)	2.5405	9.0621e-41
A_23_P19095	NM_014035	SNX24	Homo sapiens sorting nexing 24 (SNX24), mRNA [NM_014035]	2.5374	1.909e-18
A_32_P118010	THC2657593	THC2657593	ALU1_HUMAN (P39188) Alu subfamily J sequence contamination warning entry, partial (7%) [THC2657593]	2.5344	4.9755e-05
A_32_P158053	BE708118	BE708118	Transcribed locus	2.5337	0.0008
A_24_P931428	AK021980	AK021980	CDNA FLJ37747 fis, clone BRHIP2022986	2.5318	8.3138e-21
A_23_P125067	NM_000806	GABRA1	Homo sapiens gamma-aminobutyric acid (GABA) A receptor, alpha 1 (GABRA1), mRNA [NM_000806]	2.5304	0
A_24_P374516	NM_021109	TMSB4X	Thymosin, beta 4, X-linked	2.5275	9.2208e-09
A_23_P348749	NM_145025	C6orf199	Homo sapiens chromosome 6 open reading frame 199 (C6orf199), mRNA [NM_145025]	2.5185	1.1975e-25
A_23_P422809	NM_005734	HIPK3	Homo sapiens homeodomain interacting protein kinase 3 (HIPK3), mRNA [NM_005734]	2.5174	8.3955e-14
A_24_P410678	NM_002227	JAK1	Homo sapiens Janus kinase 1 (a protein tyrosine kinase) (JAK1), mRNA [NM_002227]	2.5167	3.108e-36
A_23_P41455	NM_003305	TRPC3	Homo sapiens transient receptor potential cation channel, subfamily C, member 3 (TRPC3), mRNA [NM_003305]	2.5152	1.3181e-40
A_23_P88439	NM_152332	MTAC2D1	Homo sapiens membrane targeting (tandem) C2 domain containing 1 (MTAC2D1), mRNA [NM_152332]	2.5081	0.0003
A_24_P740692	AK027173	RNF24	Ring finger protein 24	2.5043	1.1613e-13
A_24_P860781	AK092921	HLA-A	Major histocompatibility complex, class I, A	2.5013	7.3428e-43
A_23_P309779	NM_018177	N4BP2	Homo sapiens Nedd4 binding protein 2 (N4BP2), mRNA [NM_018177]	2.5007	4.515e-29
A_23_P62901	NM_006763	BTG2	Homo sapiens BTG family, member 2 (BTG2), mRNA [NM_006763]	2.4992	3.914e-05
A_23_P371729	NM_005266	GJA5	Homo sapiens gap junction protein, alpha 5, 40kDa (connexin 40) (GJA5), transcript variant A, mRNA [NM_005266]	2.4933	1.214e-11
A_32_P107821	AB075516	NPIP	Nuclear pore complex interacting protein	2.4931	2.6254e-07
A_32_P223777	ENST00000381298	ENST00000381298	Interleukin-6 receptor subunit beta precursor (IL-6R-beta) (Interleukin-6 signal transducer) (Membrane glycoprotein 130) (gp130) (Oncostatin-M receptor alpha subunit) (CD130 antigen) (CDw130). [Source:Uniprot/SWISSPROT;Acc:P40189] [ENST00000381298]	2.4928	0
A_23_P209578	NM_013445	GAD1	Glutamate decarboxylase 1 (brain, 67kDa)	2.4919	0
A_23_P68846	NM_032608	MYO18B	Homo sapiens myosin XVIIIB (MYO18B), mRNA [NM_032608]	2.4887	1.2182e-19
A_23_P29124	NM_002688	2011-09-05	Homo sapiens peanut-like 1 (Drosophila) (PNUTL1), mRNA [NM_002688]	2.4856	2.7722e-18
A_24_P393644	NM_002100	GYPB	Glycophorin B (MNS blood group)	2.4798	1.6762e-16
A_23_P354805	NM_007249	KLF12	Homo sapiens Kruppel-like factor 12 (KLF12), transcript variant 1, mRNA [NM_007249]	2.4793	6.3451e-19
A_23_P204689	NM_001004419	CLEC2D	lectin-like NK cell receptor	2.4736	7.1609e-23
A_24_P456452	AK074562	QKI	homolog of mouse quaking QKI (KH domain RNA binding protein)	2.4724	1.7523e-19
A_24_P252895	NM_139024	PHEMX	Tetraspanin 32	2.4702	1.5477e-28
A_23_P212482	NM_173653	SLC9A9	Homo sapiens solute carrier family 9 (sodium/hydrogen exchanger), isoform 9 (SLC9A9), mRNA [NM_173653]	2.4687	3.627e-16
A_32_P69166	NM_182603	FLJ37874	Homo sapiens hypothetical protein FLJ37874 (FLJ37874), mRNA [NM_182603]	2.4685	3.1062e-31
A_23_P376488	NM_000594	TNF	Homo sapiens tumor necrosis factor (TNF superfamily, member 2) (TNF), mRNA [NM_000594]	2.4684	1.0681e-06
A_24_P105332	NM_016382	CD244	Homo sapiens CD244 natural killer cell receptor 2B4 (CD244), mRNA [NM_016382]	2.4681	3.455e-36
A_24_P340390	NM_182485	CPEB2	Cytoplasmic polyadenylation element binding protein 2	2.468	3.5435e-05
A_24_P376070	AF463496	LHFP	Lipoma HMGIC fusion partner	2.4662	9.5029e-11
A_24_P716249	A_24_P716249	A_24_P716249	Unknown	2.4644	4.5157e-17
A_23_P317465	NM_016530	RAB8B	Homo sapiens RAB8B, member RAS oncogene family (RAB8B), mRNA [NM_016530]	2.4636	7.8697e-25
A_32_P119744	BC039550	LOC344595	Hypothetical LOC344595	2.4614	3.4141e-31
A_32_P16323	ENST00000355077	ENST00000355077	protein expressed in prostate, ovary, testis, and placenta 14 [Source:RefSeq_peptide;Acc:NP_001005356] [ENST00000355077]	2.4602	7.5668e-05
A_23_P384024	NM_178335	C3orf6	Homo sapiens chromosome 3 open reading frame 6 (C3orf6), transcript variant 2, mRNA [NM_178335]	2.4596	4.7529e-08
A_24_P830025	AB209689	farnesyltransferase, CAAX box, alpha variant	Homo sapiens mRNA for farnesyltransferase, CAAX box, alpha variant protein.	2.4586	1.6529e-11
A_24_P912818	XM_001130092	LOC729377	PREDICTED: Homo sapiens hypothetical protein LOC729377 (LOC729377), mRNA [XM_001130092]	2.4572	1.5319e-35
A_23_P257871	NM_001343	DAB2	Homo sapiens disabled homolog 2, mitogen-responsive phosphoprotein (Drosophila) (DAB2), mRNA [NM_001343]	2.4545	0
A_24_P922005	THC2649581	THC2649581	BU537617 AGENCOURT_10224860 NIH_MGC_126 Homo sapiens cDNA clone IMAGE:6567892 5', mRNA sequence [BU537617]	2.4505	1.5319e-38
A_23_P428139	NM_004093	EFNB2	Homo sapiens ephrin-B2 (EFNB2), mRNA [NM_004093]	2.4449	4.74e-27
A_23_P311010	NM_005840	SPRY3	Sprouty homolog 3 (Drosophila)	2.4448	3.6286e-28
A_24_P842899	THC2586873	THC2586873	Unknown	2.4427	2.6511e-28
A_23_P111311	NM_144497	AKAP12	A kinase (PRKA) anchor protein (gravin) 12	2.4384	4.5066e-05
A_32_P181297	NR_002330	ST7OT1	Homo sapiens ST7 overlapping transcript 1 (antisense non-coding RNA) (ST7OT1) on chromosome 7.	2.4347	0
A_24_P297302	A_24_P297302	A_24_P297302	Unknown	2.4344	0
A_24_P30194	NM_012420	IFIT5	Homo sapiens interferon-induced protein with tetratricopeptide repeats 5 (IFIT5), mRNA [NM_012420]	2.4339	2.3437e-05
A_23_P36100	NM_170768	ZFP91	Homo sapiens zinc finger protein 91 homolog (mouse) (ZFP91), transcript variant 2, mRNA [NM_170768]	2.4287	4.6327e-10
A_24_P228550	NM_030773	TUBB1	Homo sapiens tubulin, beta 1 (TUBB1), mRNA [NM_030773]	2.4287	0
A_24_P509189	THC2727475	THC2727475	Unknown	2.4268	0.0001
A_23_P202978	NM_033292	CASP1	Caspase 1, apoptosis-related cysteine peptidase (interleukin 1, beta, convertase)	2.4265	7.985e-11
A_23_P48728	NM_052873	MGC16028	Homo sapiens MGC16028 similar to RIKEN cDNA 1700019E19 gene (MGC16028), mRNA [NM_052873]	2.4217	4.1578e-06
A_23_P93348	NM_002341	LTB	Lymphotoxin beta (TNF superfamily, member 3)	2.4208	3.294e-08
A_23_P145264	NM_018950	HLA-F	Homo sapiens major histocompatibility complex, class I, F (HLA-F), mRNA [NM_018950]	2.4173	1.4619e-27
A_32_P142521	A_32_P142521	A_32_P142521	Unknown	2.4158	0.0003
A_24_P51777	NM_178335	C3orf6	Homo sapiens chromosome 3 open reading frame 6 (C3orf6), transcript variant 2, mRNA [NM_178335]	2.4142	2.1496e-07
A_24_P281580	NM_178831	GATS	Homo sapiens opposite strand transcription unit to STAG3 (GATS), mRNA [NM_178831]	2.4141	0
A_23_P21548	NM_024605	ARHGAP10	Homo sapiens Rho GTPase activating protein 10 (ARHGAP10), mRNA [NM_024605]	2.4123	0
A_24_P357572	NM_182603	FLJ37874	Homo sapiens hypothetical protein FLJ37874 (FLJ37874), mRNA [NM_182603]	2.4119	9.013e-22
A_32_P180920	NM_175623	RAB3IP	RAB3A interacting protein (rabin3)	2.4117	0
A_24_P326082	NM_005516	HLA-E	Homo sapiens major histocompatibility complex, class I, E (HLA-E), mRNA [NM_005516]	2.4046	6.264e-27
A_23_P29499	NM_001904	CTNNB1	Homo sapiens catenin (cadherin-associated protein), beta 1, 88kDa (CTNNB1), mRNA [NM_001904]	2.4023	4.9102e-40
A_23_P71946	NM_017688	BSPRY	Homo sapiens B-box and SPRY domain containing (BSPRY), mRNA [NM_017688]	2.4022	1.5408e-11
A_23_P211504	NM_016657	KDELR3	KDEL (Lys-Asp-Glu-Leu) endoplasmic reticulum protein retention receptor 3	2.4005	2.1524e-15
A_23_P211028	ENST00000284894	NCAM2	Neural cell adhesion molecule 2 precursor (N-CAM 2). [Source:Uniprot/SWISSPROT;Acc:O15394] [ENST00000284894]	2.398	3.4095e-28
A_23_P158925	NM_145290	GPR125	G protein-coupled receptor 125	2.3964	0
A_23_P18505	NM_207123	GAB1	Homo sapiens GRB2-associated binding protein 1 (GAB1), transcript variant 1, mRNA [NM_207123]	2.3932	8.4848e-40
A_24_P186204	NM_182503	DEADC1	Homo sapiens deaminase domain containing 1 (DEADC1), mRNA [NM_182503]	2.3884	1.1664e-34
A_23_P28598	NM_004405	DLX2	Homo sapiens distal-less homeo box 2 (DLX2), mRNA [NM_004405]	2.3875	0.0002
A_24_P135322	NM_001024629	NRP1	Neuropilin 1	2.3828	2.2931e-28
A_23_P161706	THC2703042	THC2703042	AF247167 AD031 {Homo sapiens} (exp=-1; wgp=0; cg=0), partial (95%) [THC2703042]	2.3783	6.7596e-22
A_23_P37535	NM_016530	RAB8B	Homo sapiens RAB8B, member RAS oncogene family (RAB8B), mRNA [NM_016530]	2.37	4.678e-28
A_23_P73220	NM_018351	FGD6	Homo sapiens FYVE, RhoGEF and PH domain containing 6 (FGD6), mRNA [NM_018351]	2.3684	1.8025e-27
A_23_P150325	NM_032021	AD031	Homo sapiens AD031 protein (AD031), mRNA [NM_032021]	2.3645	1.7289e-14
A_24_P944154	AL832717	MCTP2	hypothetical protein FLJ11175	2.3624	0
A_23_P308305	ENST00000317571	ENST00000317571	CDNA FLJ90394 fis, clone NT2RP2005632. (Fragment). [Source:Uniprot/SPTREMBL;Acc:Q8NCA1] [ENST00000317571]	2.3604	9.846e-13
A_23_P435601	NM_175052	SIAT8D	ST8 alpha-N-acetyl-neuraminide alpha-2,8-sialyltransferase 4	2.3596	8.2948e-06
A_24_P918507	AF237700	RGPD2	RANBP2-like and GRIP domain containing 2	2.3587	0.0002
A_23_P9662	NM_005897	IPP	Homo sapiens intracisternal A particle-promoted polypeptide (IPP), mRNA [NM_005897]	2.3586	1.6547e-34
A_23_P59005	NM_000593	TAP1	Homo sapiens transporter 1, ATP-binding cassette, sub-family B (MDR/TAP) (TAP1), mRNA [NM_000593]	2.3564	1.0632e-38
A_23_P27381	NM_005786	SDCCAG33	Homo sapiens serologically defined colon cancer antigen 33 (SDCCAG33), mRNA [NM_005786]	2.3531	8.4078e-44
A_32_P146635	CR603982	CR603982	MRNA; cDNA DKFZp313B1017 (from clone DKFZp313B1017)	2.3522	0
A_23_P111000	NM_002800	PSMB9	Proteasome (prosome, macropain) subunit, beta type, 9 (large multifunctional peptidase 2)	2.3499	1.8275e-20
A_24_P251764	NM_002090	CXCL3	Homo sapiens chemokine (C-X-C motif) ligand 3 (CXCL3), mRNA [NM_002090]	2.3483	4.4842e-44
A_24_P51786	NM_174908	CCDC50	Coiled-coil domain containing 50	2.3478	8.7042e-08
A_24_P59607	ENST00000379192	C17orf51	C17orf51 protein (Fragment). [Source:Uniprot/SPTREMBL;Acc:Q96FP1] [ENST00000379192]	2.3463	2.3302e-41
A_23_P104804	NM_006006	ZBTB16	Homo sapiens zinc finger and BTB domain containing 16 (ZBTB16), mRNA [NM_006006]	2.3384	0
A_24_P743486	AA278755	CEP27	hypothetical protein FLJ10460	2.338	1.305e-12
A_32_P46214	NM_173653	SLC9A9	Homo sapiens solute carrier family 9 (sodium/hydrogen exchanger), isoform 9 (SLC9A9), mRNA [NM_173653]	2.3371	0
A_32_P128857	AK000939	PGM5P2	Phosphoglucomutase 5 pseudogene 2	2.335	8.5488e-19
A_23_P99802	NM_013231	FLRT2	Homo sapiens fibronectin leucine rich transmembrane protein 2 (FLRT2), mRNA [NM_013231]	2.3345	1.7429e-31
A_23_P167941	NM_018965	TREM2	Homo sapiens triggering receptor expressed on myeloid cells 2 (TREM2), mRNA [NM_018965]	2.3335	2.5071e-05
A_32_P191262	NM_001097	ACR	Homo sapiens acrosin (ACR), mRNA [NM_001097]	2.3313	4.5514e-10
A_24_P910733	NM_178335	C3orf6	Homo sapiens chromosome 3 open reading frame 6 (C3orf6), transcript variant 2, mRNA [NM_178335]	2.331	3.2781e-08
A_32_P172141	NM_016952	CDON	Homo sapiens cell adhesion molecule-related/down-regulated by oncogenes (CDON), mRNA [NM_016952]	2.327	1.9034e-08
A_23_P123071	NM_001233	CAV2	Caveolin 2	2.3259	1.6566e-19
A_23_P140654	THC2609891	THC2609891	Unknown	2.3237	0
A_23_P151133	NM_006675	NET-5	Homo sapiens transmembrane 4 superfamily member tetraspan NET-5 (NET-5), mRNA [NM_006675]	2.3236	2.5047e-16
A_32_P12202	BX648919	FAM9C	Family with sequence similarity 9, member C	2.3235	6.5155e-06
A_23_P382654	NM_022091	ASCC3	dJ467N11.1 protein	2.3227	8.8213e-41
A_23_P372848	NM_002558	P2RX1	Homo sapiens purinergic receptor P2X, ligand-gated ion channel, 1 (P2RX1), mRNA [NM_002558]	2.3197	1.2353e-17
A_32_P84049	THC2624002	THC2624002	Q9BXR7_HUMAN (Q9BXR7) Interleukin 10 (Fragment), partial (93%) [THC2730601]	2.3191	2.2492e-24
A_24_P219094	CR936651	SIPA1L1	KIAA0440 protein	2.3189	4.5282e-32
A_23_P423974	NM_148959	EXOC2	hypothetical protein FLJ11026	2.3155	1.2455e-32
A_23_P209678	NM_002664	PLEK	Homo sapiens pleckstrin (PLEK), mRNA [NM_002664]	2.3152	3.0132e-33
A_24_P778607	AK090897	GPATC2	hypothetical protein FLJ10252	2.3147	3.7903e-38
A_24_P218905	NM_006675	NET-5	Homo sapiens transmembrane 4 superfamily member tetraspan NET-5 (NET-5), mRNA [NM_006675]	2.3078	0
A_24_P848379	THC2652686	THC2652686	Unknown	2.3072	0
A_32_P100439	NM_152793	Ells1	Homo sapiens hypothetical protein Ells1 (Ells1), mRNA [NM_152793]	2.3062	1.4101e-30
A_23_P30736	NM_002120	HLA-DOB	Major histocompatibility complex, class II, DO beta	2.306	7.8225e-09
A_23_P502470	NM_002184	IL6ST	Interleukin 6 signal transducer (gp130, oncostatin M receptor)	2.3057	2.3786e-28
A_32_P199923	CD653123	DICER1	helicase-moi	2.3046	0.0004
A_23_P138717	NM_001005339	RGS10	Regulator of G-protein signalling 10	2.3034	5.9111e-15
A_23_P210554	NM_006038	SPATA2	Homo sapiens spermatogenesis associated 2 (SPATA2), mRNA [NM_006038]	2.2926	2.4475e-33
A_32_P177595	A_32_P177595	A_32_P177595	Unknown	2.2903	2.2069e-09
A_24_P363278	NM_005906	MAK	Homo sapiens male germ cell-associated kinase (MAK), mRNA [NM_005906]	2.29	2.7279e-06
A_24_P53051	NM_171846	MRPL56	Lactamase, beta	2.2871	5.9852e-25
A_24_P767725	XR_017120	LOC646090	PREDICTED: Homo sapiens similar to rhophilin-like protein (LOC646090), mRNA [XR_017120]	2.2846	0.0001
A_23_P303851	NM_176886	TAS2R45	Taste receptor, type 2, member 45	2.2828	6.7472e-13
A_24_P76512	AK054626	FLJ30064	Hypothetical protein LOC644975	2.2827	1.9231e-12
A_23_P40734	NM_001097	ACR	Homo sapiens acrosin (ACR), mRNA [NM_001097]	2.2827	5.9316e-19
A_23_P109193	NM_022080	NAPB	N-ethylmaleimide-sensitive factor attachment protein, beta	2.2811	3.4936e-12
A_32_P187160	A_32_P187160	A_32_P187160	Unknown	2.2756	3.2203e-07
A_23_P110253	NM_000222	KIT	Homo sapiens v-kit Hardy-Zuckerman 4 feline sarcoma viral oncogene homolog (KIT), mRNA [NM_000222]	2.2747	0
A_23_P397671	NM_000651	CR1	Homo sapiens complement component (3b [NM_000651]	2.2718	0
A_24_P829261	NR_002819	MALAT1	Homo sapiens metastasis associated lung adenocarcinoma transcript 1 (non-coding RNA) (MALAT1) on chromosome 11.	2.2663	7.4763e-38
A_24_P179407	NM_018351	FGD6	Homo sapiens FYVE, RhoGEF and PH domain containing 6 (FGD6), mRNA [NM_018351]	2.2662	3.2011e-39
A_32_P109683	NM_001015038	PAGE5	P antigen family, member 5 (prostate associated)	2.2655	5.4238e-10
A_23_P301925	ENST00000361624	COX1	Cytochrome c oxidase subunit 1 (EC 1.9.3.1) (Cytochrome c oxidase polypeptide I). [Source:Uniprot/SWISSPROT;Acc:P00395] [ENST00000361624]	2.2643	1.8741e-06
A_24_P239531	NM_014733	ZFYVE16	Homo sapiens zinc finger, FYVE domain containing 16 (ZFYVE16), mRNA [NM_014733]	2.2639	2.2407e-25
A_32_P157385	AK124175	HSUP1	Similar to RPE-spondin	2.2609	1.7465e-26
A_24_P15154	NM_005241	EVI1	Homo sapiens ecotropic viral integration site 1 (EVI1), mRNA [NM_005241]	2.2579	1.5586e-23
A_24_P299565	AF118079	PRO1854	PRO1854 protein	2.2564	1.1992e-07
A_32_P125185	CB853424	CB853424	Transcribed locus	2.2559	6.8389e-13
A_32_P151570	A_32_P151570	A_32_P151570	Unknown	2.2544	2.6294e-12
A_23_P147839	NM_004439	EPHA5	EPH receptor A5	2.2458	1.5042e-06
A_32_P224566	NM_001004317	LIN28B	Lin-28 homolog B (C. elegans)	2.2458	0
A_24_P918527	M74720	TCF4	Transcription factor 4	2.2451	3.1829e-21
A_32_P145639	AK057116	AK057116	Homo sapiens cDNA FLJ32554 fis, clone SPLEN1000106.	2.2448	5.2169e-25
A_23_P161352	NM_014241	PTPLA	Homo sapiens protein tyrosine phosphatase-like (proline instead of catalytic arginine), member a (PTPLA), mRNA [NM_014241]	2.2414	8.5576e-15
A_32_P77421	THC2656116	THC2656116	Unknown	2.2393	1.1263e-10
A_24_P225878	NM_022342	KIF9	Kinesin family member 9	2.2375	1.0185e-06
A_23_P114118	NM_006089	SCML2	Homo sapiens sex comb on midleg-like 2 (Drosophila) (SCML2), mRNA [NM_006089]	2.2335	4.4321e-30
A_24_P924816	NM_052885	SLC2A13	Homo sapiens solute carrier family 2 (facilitated glucose transporter), member 13 (SLC2A13), mRNA [NM_052885]	2.2333	4.9976e-15
A_24_P334248	NM_014996	PLCL3	Homo sapiens phospholipase C-like 3 (PLCL3), mRNA [NM_014996]	2.2237	3.3771e-40
A_24_P251534	NM_001008392	CTDSPL	HYA22 protein	2.223	1.3027e-38
A_32_P23810	THC2543854	THC2543854	ALU4_HUMAN (P39191) Alu subfamily SB2 sequence contamination warning entry, partial (40%) [THC2543854]	2.2189	2.6614e-06
A_24_P529168	BC040320	C13orf25	Chromosome 13 open reading frame 25	2.218	3.2546e-36
A_23_P338495	NM_001002265	2011-03-08	Membrane-associated ring finger (C3HC4) 8	2.2143	7.4475e-15
A_23_P319050	ENST00000339914	ENST00000339914	Zinc finger protein 493. [Source:Uniprot/SWISSPROT;Acc:Q6ZR52] [ENST00000339914]	2.2115	3.2302e-22
A_32_P136033	AK090477	SIPA1L1	KIAA0440 protein	2.2093	3.0716e-15
A_24_P782102	A_24_P782102	A_24_P782102	Unknown	2.2056	2.6382e-14
A_24_P873659	NR_002819	MALAT1	Homo sapiens metastasis associated lung adenocarcinoma transcript 1 (non-coding RNA) (MALAT1) on chromosome 11.	2.2028	3.0617e-15
A_23_P126917	NM_001542	IGSF3	Homo sapiens immunoglobulin superfamily, member 3 (IGSF3), transcript variant 1, mRNA [NM_001542]	2.2025	2.5289e-05
A_24_P93624	NM_175623	RAB3IP	RAB3A interacting protein (rabin3)	2.1988	1.6149e-09
A_24_P246361	NM_006633	IQGAP2	Homo sapiens IQ motif containing GTPase activating protein 2 (IQGAP2), mRNA [NM_006633]	2.1886	0
A_32_P75399	THC2551774	THC2551774	HUMSEF21A SEF2-1A protein {Homo sapiens} (exp=-1; wgp=0; cg=0), partial (5%) [THC2551774]	2.188	1.5865e-31
A_23_P202104	NM_005729	PPIF	Homo sapiens peptidylprolyl isomerase F (cyclophilin F) (PPIF), nuclear gene encoding mitochondrial protein, mRNA [NM_005729]	2.1864	0
A_24_P95723	D50915	KIAA0125	KIAA0125 gene product	2.1819	3.5998e-30
A_23_P313938	AY358854	PPIF	Homo sapiens clone DNA142995 PPIF (UNQ6502) mRNA, complete cds.	2.1818	1.3365e-07
A_32_P17163	ENST00000368149	ENST00000368149	Rho-GTPase-activating protein 18 (MacGAP). [Source:Uniprot/SWISSPROT;Acc:Q8N392] [ENST00000368149]	2.1814	2.6815e-16
A_23_P361448	NM_144665	SESN3	Homo sapiens sestrin 3 (SESN3), mRNA [NM_144665]	2.179	1.8618e-25
A_24_P457442	THC2613423	THC2613423	Q91G39_IRV6 (Q91G39) 066L, partial (25%) [THC2613423]	2.1757	6.4074e-05
A_23_P75850	BX538342	GVIN1	GTPase, very large interferon inducible 1	2.1702	2.0662e-38
A_32_P163594	A_32_P163594	A_32_P163594	Unknown	2.1688	0
A_23_P205519	NM_022060	ABHD4	Homo sapiens abhydrolase domain containing 4 (ABHD4), mRNA [NM_022060]	2.1679	4.6688e-27
A_24_P347447	NM_014992	DAAM1	Homo sapiens dishevelled associated activator of morphogenesis 1 (DAAM1), mRNA [NM_014992]	2.1645	7.7536e-38
A_23_P88069	NM_005780	LHFP	Homo sapiens lipoma HMGIC fusion partner (LHFP), mRNA [NM_005780]	2.1645	4.4505e-41
A_23_P128174	NM_175623	RAB3IP	RAB3A interacting protein (rabin3)	2.1642	0
A_23_P416305	ENST00000356931	ENST00000356931	MGC10850 protein. [Source:Uniprot/SPTREMBL;Acc:Q96C21] [ENST00000356931]	2.1623	3.5366e-12
A_24_P483145	AK000939	PGM5P2	Phosphoglucomutase 5 pseudogene 2	2.161	1.1985e-06
A_23_P22744	NM_130467	PAGE-5	Homo sapiens PAGE-5 protein (PAGE-5), mRNA [NM_130467]	2.1609	4.7787e-10
A_24_P416961	NM_001670	ARVCF	Homo sapiens armadillo repeat gene deletes in velocardiofacial syndrome (ARVCF), mRNA [NM_001670]	2.1608	2.547e-13
A_32_P214107	THC2671876	THC2671876	ALU7_HUMAN (P39194) Alu subfamily SQ sequence contamination warning entry, partial (4%) [THC2671876]	2.1567	3.0862e-11
A_24_P920398	NM_017554	PARP14	KIAA1268 protein	2.156	1.9558e-23
A_23_P49686	AF090926	CLTC	PRO0456 protein	2.1553	2.1743e-10
A_32_P185361	AL109784	DYRK1A	Dual-specificity tyrosine-(Y)-phosphorylation regulated kinase 1A	2.1539	6.1391e-08
A_24_P236235	NM_013231	FLRT2	Homo sapiens fibronectin leucine rich transmembrane protein 2 (FLRT2), mRNA [NM_013231]	2.1534	0
A_32_P104478	AK026881	AK026881	CDNA: FLJ23228 fis, clone CAE06654	2.1526	1.8521e-32
A_24_P933503	NM_015026	KIAA1040	Homo sapiens KIAA1040 protein (KIAA1040), mRNA [NM_015026]	2.1525	3.229e-19
A_23_P30848	NM_005516	HLA-E	Homo sapiens major histocompatibility complex, class I, E (HLA-E), mRNA [NM_005516]	2.1509	3.4759e-36
A_23_P52806	NM_012104	BACE	Beta-site APP-cleaving enzyme 1	2.1495	8.0483e-06
A_24_P936319	BC030115	BC030115	CDNA clone IMAGE:4801326	2.1492	2.3484e-36
A_24_P916979	A_24_P916979	A_24_P916979	Unknown	2.1476	1.3467e-05
A_24_P355944	NM_004093	EFNB2	Homo sapiens ephrin-B2 (EFNB2), mRNA [NM_004093]	2.1449	1.1441e-10
A_23_P378588	NM_178815	ARL8	Homo sapiens ADP-ribosylation factor-like 8 (ARL8), mRNA [NM_178815]	2.1446	0
A_23_P30972	NM_022091	ASCC3	dJ467N11.1 protein	2.1444	0
A_23_P1170	NM_174890	ANUBL1	Homo sapiens AN1, ubiquitin-like, homolog (Xenopus laevis) (ANUBL1), mRNA [NM_174890]	2.1436	5.5741e-15
A_23_P376591	NM_206808	CLYBL	Citrate lyase beta like	2.1432	2.8021e-31
A_24_P913855	A_24_P913855	A_24_P913855	Unknown	2.1424	2.3321e-21
A_24_P325107	NM_020940	KIAA1600	Homo sapiens KIAA1600 (KIAA1600), mRNA [NM_020940]	2.1382	9.5254e-22
A_23_P211806	NM_017724	LRRFIP2	Homo sapiens leucine rich repeat (in FLII) interacting protein 2 (LRRFIP2), mRNA [NM_017724]	2.1368	7.8122e-38
A_23_P75848	BX538342	GVIN1	GTPase, very large interferon inducible 1	2.1332	1.314e-07
A_24_P913016	ENST00000368778	ENST00000368778	Uroporphyrinogen-III synthase (EC 4.2.1.75) (UROS) (Uroporphyrinogen- III cosynthetase) (Hydroxymethylbilane hydrolyase [cyclizing]) (UROIIIS). [Source:Uniprot/SWISSPROT;Acc:P10746] [ENST00000368778]	2.1296	7.1212e-23
A_24_P119002	NM_015475	FAM98A	DKFZP564F0522 protein	2.1233	0
A_32_P874394	AK024304	AK024304	Full length insert cDNA clone ZD53C10	2.1229	0.0002
A_23_P417753	NM_002547	OPHN1	Homo sapiens oligophrenin 1 (OPHN1), mRNA [NM_002547]	2.1199	7.0458e-31
A_24_P698128	THC2689155	THC2689155	Unknown	2.1178	6.8701e-13
A_23_P144317	A_23_P144317	A_23_P144317	Unknown	2.1167	2.7679e-05
A_32_P164917	AL833005	LOC728965	MRNA; cDNA DKFZp666D074 (from clone DKFZp666D074)	2.1151	4.7804e-16
A_24_P308109	NM_015030	FRYL	Homo sapiens FRY-like (FRYL), mRNA [NM_015030]	2.1145	1.5064e-16
A_23_P205778	NM_016194	GNB5	Homo sapiens guanine nucleotide binding protein (G protein), beta 5 (GNB5), transcript variant 2, mRNA [NM_016194]	2.1135	6.7772e-10
A_23_P208674	NM_175063	LOC284361	Hematopoietic signal peptide-containing	2.1134	1.2679e-07
A_32_P198791	THC2557762	THC2557762	ALU2_HUMAN (P39189) Alu subfamily SB sequence contamination warning entry, partial (8%) [THC2557762]	2.1123	1.2968e-17
A_24_P168574	ENST00000371081	ENST00000371081	Guanine nucleotide-binding protein G(s) subunit alpha isoforms XLas (Adenylate cyclase-stimulating G alpha protein) (Extra large alphas protein) (XLalphas). [Source:Uniprot/SWISSPROT;Acc:Q5JWF2] [ENST00000371081]	2.1081	4.4151e-31
A_23_P155185	ENST00000256031	ATP13A3	Probable cation-transporting ATPase 13A3 (EC 3.6.3.-) (ATPase family homolog up-regulated in senescence cells 1). [Source:Uniprot/SWISSPROT;Acc:Q9H7F0] [ENST00000256031]	2.1072	2.476e-19
A_32_P138409	THC2623234	THC2623234	Unknown	2.1063	2.1801e-38
A_23_P343977	AK125510	C1orf104	Homo sapiens cDNA FLJ43522 fis, clone PLACE5000260.	2.1024	2.2547e-05
A_24_P930963	CR616309	CR616309	Full-length cDNA clone CS0DF015YK23 of Fetal brain of Homo sapiens (human)	2.1019	2.3141e-06
A_24_P930507	ENST00000377607	ENST00000377607	Ataxin-2 (Spinocerebellar ataxia type 2 protein) (Trinucleotide repeat-containing gene 13 protein). [Source:Uniprot/SWISSPROT;Acc:Q99700] [ENST00000377607]	2.0964	2.7059e-13
A_24_P109375	NM_198853	TRIM73	Tripartite motif-containing 73	2.0944	2.3119e-08
A_32_P790284	NM_031303	KATNAL2	Homo sapiens similar to RIKEN cDNA 4933439B08 gene (MGC33211), mRNA [NM_031303]	2.0922	2.2274e-05
A_32_P193822	NM_014827	KIAA0663	Homo sapiens KIAA0663 gene product (KIAA0663), mRNA [NM_014827]	2.092	2.1393e-25
A_23_P163402	NM_000499	CYP1A1	Homo sapiens cytochrome P450, family 1, subfamily A, polypeptide 1 (CYP1A1), mRNA [NM_000499]	2.0918	2.3314e-07
A_23_P212073	NM_207296	MBNL	Muscleblind-like (Drosophila)	2.0916	1.0245e-23
A_24_P65098	BC005335	TMEM87A	DKFZP564G2022 protein	2.0914	9.4227e-36
A_24_P349092	NM_005779	LHFPL2	Homo sapiens lipoma HMGIC fusion partner-like 2 (LHFPL2), mRNA [NM_005779]	2.0908	0.0006
A_24_P709844	A_24_P709844	A_24_P709844	Unknown	2.0887	8.5992e-20
A_23_P377141	NM_015186	CHAC	Vacuolar protein sorting 13 homolog A (S. cerevisiae)	2.0881	3.4725e-40
A_23_P335695	AK023854	OBSL1	KIAA0657 protein	2.0876	2.7906e-37
A_24_P927976	AL512748	KATNAL2	hypothetical protein DKFZp667C165	2.0875	0.0007
A_24_P65658	ENST00000221315	ZNF432	Zinc finger protein 432. [Source:Uniprot/SWISSPROT;Acc:O94892] [ENST00000221315]	2.086	1.6419e-05
A_32_P30339	THC2539492	THC2539492	CT091_HUMAN (Q5T1J6) Protein C20orf91, partial (66%) [THC2539492]	2.0857	5.5705e-05
A_23_P317654	NM_001356	DDX3	DEAD (Asp-Glu-Ala-Asp) box polypeptide 3, X-linked	2.0833	1.4848e-35
A_23_P16944	NM_001006946	SDC1	Syndecan 1	2.0825	2.9094e-13
A_23_P358857	NM_201269	ZNF644	Homo sapiens zinc finger protein 644 (ZNF644), transcript variant 1, mRNA [NM_201269]	2.08	8.7156e-36
A_32_P98914	AW389821	MEIS1	Meis1, myeloid ecotropic viral integration site 1 homolog (mouse)	2.0794	3.2627e-17
A_32_P160115	AF070565	AF070565	Clone 24425 mRNA sequence	2.0762	3.2447e-13
A_23_P364167	AB033055	ODF2L	KIAA1229 protein	2.0755	0.0004
A_32_P69987	THC2548567	THC2548567	Unknown	2.0755	0
A_23_P28595	NM_004405	DLX2	Homo sapiens distal-less homeo box 2 (DLX2), mRNA [NM_004405]	2.0746	0.0002
A_23_P357985	NM_001037866	RGPD7	Homo sapiens RANBP2-like and GRIP domain containing 7 (RGPD7), mRNA [NM_001037866]	2.0733	6.1658e-17
A_23_P412515	NM_012129	CLDN12	Homo sapiens claudin 12 (CLDN12), mRNA [NM_012129]	2.0729	1.2099e-11
A_23_P18123	NM_014932	NLGN1	Homo sapiens neuroligin 1 (NLGN1), mRNA [NM_014932]	2.072	6.1964e-38
A_24_P359091	AK094938	AK094938	MRNA; cDNA DKFZp686P0734 (from clone DKFZp686P0734)	2.0694	6.0822e-05
A_32_P57453	A_32_P57453	A_32_P57453	Unknown	2.0688	3.3169e-23
A_24_P648880	NR_002211	MEIS4	Homo sapiens Meis1, myeloid ecotropic viral integration site 1 homolog 4 (mouse) (MEIS4) on chromosome 17.	2.0659	6.4622e-37
A_24_P488510	A_24_P488510	A_24_P488510	Unknown	2.0641	1.2632e-05
A_23_P213038	BX648355	GSTCD	hypothetical protein FLJ13273	2.0604	4.2789e-21
A_24_P922838	AI570381	DDHD2	KIAA0725 protein	2.0591	1.064e-11
A_23_P370707	A_23_P370707	A_23_P370707	Unknown	2.0561	1.0301e-22
A_23_P212715	NM_170662	CBLB	Homo sapiens Cas-Br-M (murine) ecotropic retroviral transforming sequence b (CBLB), mRNA [NM_170662]	2.0552	1.0311e-05
A_24_P161018	NM_017554	PARP14	KIAA1268 protein	2.051	9.1117e-09
A_32_P222496	D89937	D89937	Homo sapiens mRNA for follistatin-related protein (FRP), complete cds.	2.0506	1.012e-06
A_24_P325046	ENST00000322831	ENST00000322831	Zinc finger CCHC domain-containing protein 7. [Source:Uniprot/SWISSPROT;Acc:Q8N3Z6] [ENST00000322831]	2.0492	1.2637e-22
A_32_P222961	NM_001012968	RP11-93B10.1	Hypothetical protein LOC139886	2.0458	7.6201e-22
A_23_P6293	NM_018961	UBASH3A	Homo sapiens ubiquitin associated and SH3 domain containing, A (UBASH3A), transcript variant 1, mRNA [NM_018961]	2.0442	2.8863e-27
A_23_P373126	BC035647	HLA-A	Major histocompatibility complex, class I, A	2.0437	4.5897e-35
A_32_P174832	THC2762599	THC2762599	BI523298 603175578T1 NIH_MGC_121 Homo sapiens cDNA clone IMAGE:5239842 3', mRNA sequence [BI523298]	2.0429	6.6278e-05
A_24_P194688	NM_181723	EFHA2	Homo sapiens EF hand domain family, member A2 (EFHA2), mRNA [NM_181723]	2.041	0
A_32_P172716	CD633154	CD633154	Transcribed locus	2.041	0.0005
A_24_P942694	NM_018017	C10orf118	Homo sapiens chromosome 10 open reading frame 118 (C10orf118), mRNA [NM_018017]	2.0409	2.335e-31
A_24_P366967	NM_017737	FNBP1L	Homo sapiens formin binding protein 1-like (FNBP1L), mRNA [NM_017737]	2.04	2.4166e-13
A_23_P27332	NM_003199	TCF4	Homo sapiens transcription factor 4 (TCF4), mRNA [NM_003199]	2.0389	4.048e-22
A_24_P570454	THC2655703	THC2655703	ALU1_HUMAN (P39188) Alu subfamily J sequence contamination warning entry, partial (16%) [THC2655703]	2.038	1.4675e-11
A_23_P29723	NM_001012410	SGOL1	Shugoshin-like 1 (S. pombe)	2.0357	5.5609e-15
A_24_P598516	AK021595	CBFA2T2	Core-binding factor, runt domain, alpha subunit 2; translocated to, 2	2.0356	4.6378e-14
A_23_P216889	NM_001012421	ANKRD20A2	Ankyrin repeat domain 20 family, member A2	2.0331	4.4982e-23
A_24_P69439	NM_030780	MFTC	Homo sapiens mitochondrial folate transporter [NM_030780]	2.0319	1.0926e-23
A_23_P166147	AL096727	RP13-401N8.2	Hypothetical gene supported by BC042812	2.0319	5.7506e-05
A_32_P12327	XM_931798	LOC643783	Hypothetical protein LOC643783	2.0292	2.0858e-39
A_23_P337917	NM_177444	PPFIBP1	PTPRF interacting protein, binding protein 1 (liprin beta 1)	2.0289	8.2606e-16
A_23_P392384	NM_001002260	C9orf58	hypothetical protein FLJ12783	2.028	0.0007
A_23_P163455	NM_002373	MAP1A	Homo sapiens microtubule-associated protein 1A (MAP1A), mRNA [NM_002373]	2.0274	2.5625e-27
A_23_P156443	NM_002269	KPNA5	Homo sapiens karyopherin alpha 5 (importin alpha 6) (KPNA5), mRNA [NM_002269]	2.0261	2.2226e-23
A_24_P393372	AK098354	AK098354	CDNA FLJ25488 fis, clone CBR00232	2.0253	8.102e-28
A_24_P538557	AK026802	MERTK	C-mer proto-oncogene tyrosine kinase	2.0247	1.0282e-08
A_23_P29830	NM_170662	CBLB	Homo sapiens Cas-Br-M (murine) ecotropic retroviral transforming sequence b (CBLB), mRNA [NM_170662]	2.0246	9.8398e-07
A_23_P41159	NM_174907	PPP4R2	Homo sapiens protein phosphatase 4, regulatory subunit 2 (PPP4R2), mRNA [NM_174907]	2.0235	1.2368e-36
A_23_P140434	NM_018728	MYO5C	Homo sapiens myosin VC (MYO5C), mRNA [NM_018728]	2.0214	4.4278e-09
A_23_P170280	NM_020453	ATP10D	Homo sapiens ATPase, Class V, type 10D (ATP10D), mRNA [NM_020453]	2.0189	1.0155e-07
A_23_P158933	NM_145290	GPR125	G protein-coupled receptor 125	2.0187	0
A_24_P252223	NM_021945	C6orf85	hypothetical protein FLJ22174	2.0163	0
A_32_P78783	ENST00000306502	ZNF778	CDNA FLJ31875 fis, clone NT2RP7002450, weakly similar to ZINC FINGER PROTEIN 84. [Source:Uniprot/SPTREMBL;Acc:Q96MU6] [ENST00000306502]	2.0133	8.954e-22
A_23_P313728	NM_015475	FAM98A	DKFZP564F0522 protein	2.0132	6.0331e-24
A_32_P224498	THC2537367	THC2537367	AL564305 AL564305 Homo sapiens FETAL LIVER Homo sapiens cDNA clone CS0DM004YC01 3-PRIME, mRNA sequence [AL564305]	2.0127	1.3121e-05
A_32_P228775	NM_174907	PPP4R2	Homo sapiens protein phosphatase 4, regulatory subunit 2 (PPP4R2), mRNA [NM_174907]	2.0106	0
A_32_P191735	CK820941	CK820941	Transcribed locus	2.0098	0
A_23_P41304	NM_002102	GYPE	Glycophorin B (MNS blood group)	2.0094	1.3053e-06
A_24_P937135	DQ335469	KIAA1109	hypothetical protein FLJ21404	2.0085	4.455e-23
A_24_P659113	NM_152523	FLJ40432	Homo sapiens hypothetical protein FLJ40432 (FLJ40432), mRNA [NM_152523]	2.0072	0
A_24_P33197	NM_001078170	RGPD2	Homo sapiens RANBP2-like and GRIP domain containing 2 (RGPD2), mRNA [NM_001078170]	2.007	2.0894e-29
A_23_P65812	NM_005585	SMAD6	Homo sapiens SMAD, mothers against DPP homolog 6 (Drosophila) (SMAD6), mRNA [NM_005585]	2.0062	1.8849e-16
A_32_P17525	THC2664860	THC2664860	Q9SI74_ARATH (Q9SI74) F23N19.12, partial (5%) [THC2664860]	2.0059	1.1092e-39
A_23_P419277	ENST00000374390	ENST00000374390	cellular modulator of immune recognition isoform 7 [Source:RefSeq_peptide;Acc:NP_001002266] [ENST00000374390]	2.0051	2.2045e-11
A_23_P99275	NM_002258	KLRB1	Homo sapiens killer cell lectin-like receptor subfamily B, member 1 (KLRB1), mRNA [NM_002258]	2.0038	1.8771e-06
A_32_P43034	BX100437	BX100437	Transcribed locus	2.0036	6.4535e-05
A_23_P212025	AK094201	ZBTB38	Zinc finger and BTB domain containing 38	2.0013	7.6205e-25
A_23_P54116	NM_014992	DAAM1	Homo sapiens dishevelled associated activator of morphogenesis 1 (DAAM1), mRNA [NM_014992]	2.0001	0
A_23_P78108	NM_005165	ALDOC	Homo sapiens aldolase C, fructose-bisphosphate (ALDOC), mRNA [NM_005165]	-2.0006	6.436e-32
A_23_P120899	NM_000395	CSF2RB	Homo sapiens colony stimulating factor 2 receptor, beta, low-affinity (granulocyte-macrophage) (CSF2RB), mRNA [NM_000395]	-2.0019	6.3329e-29
A_32_P18838	BC051742	BC051742	CDNA clone IMAGE:4826633	-2.0023	1.8577e-07
A_24_P55391	BC082970	HIP1	Huntingtin interacting protein 1	-2.0025	2.1796e-25
A_24_P354496	NM_153008	FLJ30277	Homo sapiens hypothetical protein FLJ30277 (FLJ30277), mRNA [NM_153008]	-2.0027	9.4372e-26
A_23_P8513	NM_013322	SNX10	Homo sapiens sorting nexin 10 (SNX10), mRNA [NM_013322]	-2.0061	1.2168e-18
A_23_P120594	NM_032501	ACAS2L	Homo sapiens acetyl-Coenzyme A synthetase 2 (AMP forming)-like (ACAS2L), nuclear gene encoding mitochondrial protein, mRNA [NM_032501]	-2.0099	7.5744e-06
A_23_P257497	ENST00000367073	ENST00000367073	U92818 unnamed HERV-H protein {Homo sapiens} (exp=-1; wgp=0; cg=0), partial (23%) [THC2647796]	-2.0104	1.3231e-06
A_24_P306063	NM_020819	KIAA1411	Homo sapiens KIAA1411 (KIAA1411), mRNA [NM_020819]	-2.0108	4.1863e-07
A_23_P214111	NM_022113	KIF13A	Homo sapiens kinesin family member 13A (KIF13A), mRNA [NM_022113]	-2.0108	0
A_32_P30891	BC052945	BC052945	Homo sapiens cDNA clone IMAGE:5268504, partial cds [BC052945]	-2.0161	2.3001e-20
A_32_P202246	NM_015011	RP11-54H7.1	KIAA0865 protein	-2.0162	7.8591e-21
A_23_P427023	NM_130759	GIMAP1	Homo sapiens GTPase, IMAP family member 1 (GIMAP1), mRNA [NM_130759]	-2.0163	4.1958e-39
A_23_P55281	NM_004502	HOXB7	Homo sapiens homeo box B7 (HOXB7), mRNA [NM_004502]	-2.0173	8.2144e-21
A_32_P11969	THC2694800	THC2694800	Q8IVR2_HUMAN (Q8IVR2) APOLD1 protein (Fragment), partial (18%) [THC2694800]	-2.0181	3.7947e-14
A_23_P5051	BC063426	NCLN	hypothetical protein from EUROIMAGE 2021883	-2.0181	8.2007e-36
A_24_P937306	ENST00000380291	ENST00000380291	AP-1 complex subunit sigma-2 (Adapter-related protein complex 1 sigma- 1B subunit) (Sigma-adaptin 1B) (Adaptor protein complex AP-1 sigma-1B subunit) (Golgi adaptor HA1/AP1 adaptin sigma-1B subunit) (Clathrin assembly protein complex 1 sigma-1B small...	-2.0192	1.0461e-20
A_23_P161507	NM_004923	MTL5	Homo sapiens metallothionein-like 5, testis-specific (tesmin) (MTL5), mRNA [NM_004923]	-2.0212	4.5247e-25
A_32_P207903	THC2660448	THC2660448	Unknown	-2.0236	2.0426e-05
A_23_P78782	NM_001217	CA11	Homo sapiens carbonic anhydrase XI (CA11), mRNA [NM_001217]	-2.0245	1.1593e-14
A_23_P148609	NM_021796	PLAC1	Homo sapiens placenta-specific 1 (PLAC1), mRNA [NM_021796]	-2.0253	3.2894e-05
A_24_P408047	NM_020904	PLEKHA4	Homo sapiens pleckstrin homology domain containing, family A (phosphoinositide binding specific) member 4 (PLEKHA4), mRNA [NM_020904]	-2.0261	5.3626e-38
A_32_P166693	BQ184357	BQ184357	Transcribed locus	-2.0266	0.0007
A_23_P46604	NM_020448	DJ462O23.2	Homo sapiens hypothetical protein dJ462O23.2 (DJ462O23.2), mRNA [NM_020448]	-2.0285	0
A_32_P203728	THC2631297	THC2631297	Unknown	-2.0287	3.8477e-29
A_23_P88194	NM_003616	SIP1	Homo sapiens survival of motor neuron protein interacting protein 1 (SIP1), transcript variant alpha, mRNA [NM_003616]	-2.0291	1.4013e-45
A_32_P4934	THC2640099	THC2640099	Unknown	-2.0299	2.3966e-26
A_23_P69310	NM_003965	CCRL2	Chemokine (C-C motif) receptor-like 2	-2.032	9.4268e-29
A_23_P501232	NM_003636	KCNAB2	Potassium voltage-gated channel, shaker-related subfamily, beta member 2	-2.0325	5.9053e-16
A_23_P158596	NM_001040196	AGTRAP	Homo sapiens angiotensin II receptor-associated protein (AGTRAP), transcript variant 4, mRNA [NM_001040196]	-2.0353	2.6486e-09
A_23_P155257	NM_032682	FOXP1	Homo sapiens forkhead box P1 (FOXP1), mRNA [NM_032682]	-2.0358	3.4463e-16
A_23_P68106	NM_021103	TMSB10	Thymosin, beta 10	-2.0362	0
A_32_P486693	AK093229	AK093229	CDNA FLJ35910 fis, clone TESTI2009987	-2.0363	0.0003
A_23_P106761	NM_007074	CORO1A	Homo sapiens coronin, actin binding protein, 1A (CORO1A), mRNA [NM_007074]	-2.0364	1.6721e-34
A_23_P84230	NM_032109	OTP	Homo sapiens orthopedia homolog (Drosophila) (OTP), mRNA [NM_032109]	-2.0381	1.7698e-07
A_23_P114670	NM_014448	ARHGEF16	Homo sapiens Rho guanine exchange factor (GEF) 16 (ARHGEF16), mRNA [NM_014448]	-2.0384	3.2442e-37
A_23_P201497	NM_182663	RASSF5	hypothetical protein MGC10823	-2.039	4.2182e-21
A_32_P157465	AK091904	AK091904	CDNA FLJ34585 fis, clone KIDNE2008758	-2.0393	2.85e-24
A_24_P185689	NM_032501	ACAS2L	Homo sapiens acetyl-Coenzyme A synthetase 2 (AMP forming)-like (ACAS2L), nuclear gene encoding mitochondrial protein, mRNA [NM_032501]	-2.0395	1.1053e-06
A_23_P36888	NM_138371	MGC16044	Homo sapiens hypothetical protein MGC16044 (MGC16044), mRNA [NM_138371]	-2.0397	6.1313e-05
A_32_P227921	THC2660361	THC2660361	Unknown	-2.0397	1.5864e-07
A_23_P88228	NM_138790	C14orf175	Homo sapiens chromosome 14 open reading frame 175 (C14orf175), mRNA [NM_138790]	-2.0399	8.2155e-08
A_32_P116391	THC2651172	THC2651172	ADRHEXON pre-VI {Murine adenovirus 1} (exp=-1; wgp=0; cg=0), partial (21%) [THC2651172]	-2.0409	2.5493e-19
A_23_P375165	NM_207459	FLJ35767	Homo sapiens FLJ35767 protein (FLJ35767), mRNA [NM_207459]	-2.0448	2.6304e-09
A_23_P101246	BC016993	LOC147645	Hypothetical protein LOC147645	-2.045	9.7786e-09
A_24_P826348	NM_198581	ZC3H6	Zinc finger CCCH-type containing 6	-2.0451	6.4721e-13
A_23_P310094	AL833294	SYNPO2	Synaptopodin 2	-2.0452	7.4327e-05
A_24_P401830	AK057725	MATN1	Matrilin 1, cartilage matrix protein	-2.0452	5.4468e-13
A_23_P210690	NM_021158	TRIB3	Homo sapiens tribbles homolog 3 (Drosophila) (TRIB3), mRNA [NM_021158]	-2.0475	6.0986e-40
A_23_P301051	ENST00000244221	KIAA1155	PREDICTED: Homo sapiens KIAA1155 protein, transcript variant 1 (KIAA1155), mRNA [XM_376062]	-2.0494	1.2105e-11
A_23_P31810	NM_005195	CEBPD	CCAAT/enhancer binding protein (C/EBP), delta	-2.0508	2.3641e-30
A_23_P107432	AK093253	FLJ35934	FLJ35934 protein	-2.0513	1.1543e-10
A_32_P12372	THC2673554	THC2673554	ALU1_HUMAN (P39188) Alu subfamily J sequence contamination warning entry, partial (7%) [THC2673554]	-2.0514	0.0003
A_23_P80040	NM_006404	PROCR	Homo sapiens protein C receptor, endothelial (EPCR) (PROCR), mRNA [NM_006404]	-2.0521	2.7031e-10
A_24_P176374	NM_030928	CDT1	Homo sapiens DNA replication factor (CDT1), mRNA [NM_030928]	-2.0526	4.6401e-38
A_23_P164284	NM_001307	CLDN7	Homo sapiens claudin 7 (CLDN7), mRNA [NM_001307]	-2.0579	2.0311e-06
A_23_P380939	NM_001720	BMP8B	Homo sapiens bone morphogenetic protein 8b (osteogenic protein 2) (BMP8B), mRNA [NM_001720]	-2.0585	3.385e-05
A_24_P307498	NM_198493	FLJ45235	Homo sapiens FLJ45235 protein (FLJ45235), mRNA [NM_198493]	-2.0592	1.4786e-08
A_24_P110601	A_24_P110601	A_24_P110601	Unknown	-2.0599	9.0029e-13
A_23_P86089	NM_022834	VWA1	hypothetical protein FLJ22215	-2.0607	2.8148e-22
A_23_P259103	NM_022090	LOC63920	Homo sapiens transposon-derived Buster3 transposase-like (LOC63920), mRNA [NM_022090]	-2.0642	0
A_24_P935893	NM_017709	FAM46C	Homo sapiens family with sequence similarity 46, member C (FAM46C), mRNA [NM_017709]	-2.0643	0
A_24_P305038	NM_152466	FLJ25168	Homo sapiens hypothetical protein FLJ25168 (FLJ25168), mRNA [NM_152466]	-2.0646	1.2645e-15
A_24_P145019	AK095554	SCOC	short coiled-coil protein	-2.0655	2.758e-17
A_23_P141342	NM_199282	ARHGAP27	Rho GTPase activating protein 27	-2.0662	2.6069e-07
A_23_P34546	NM_006642	SDCCAG8	Homo sapiens serologically defined colon cancer antigen 8 (SDCCAG8), mRNA [NM_006642]	-2.0688	4.0657e-26
A_23_P113311	NM_017732	ARIH2	hypothetical protein FLJ20262	-2.0741	4.697e-20
A_23_P36745	NM_000690	ALDH2	Homo sapiens aldehyde dehydrogenase 2 family (mitochondrial) (ALDH2), nuclear gene encoding mitochondrial protein, mRNA [NM_000690]	-2.0768	2.8946e-29
A_24_P135856	NM_016124	RHD	Rh blood group, D antigen	-2.0768	1.0742e-13
A_23_P348323	NM_007144	PCGF2	Homo sapiens ring finger protein 110 (RNF110), mRNA [NM_007144]	-2.0797	1.7949e-05
A_24_P171268	NM_182663	RASSF5	hypothetical protein MGC10823	-2.0805	6.8287e-17
A_32_P64570	NM_153186	ANKRD15	KIAA0172 protein	-2.083	8.71e-10
A_24_P205105	BC005241	MRE11A	MRE11 meiotic recombination 11 homolog A (S. cerevisiae)	-2.0849	2.8026e-45
A_23_P150789	NM_007173	PRSS23	Homo sapiens protease, serine, 23 (PRSS23), mRNA [NM_007173]	-2.0881	0.0002
A_23_P165360	NM_001040445	ASB1	Homo sapiens ankyrin repeat and SOCS box-containing 1 (ASB1), mRNA [NM_001040445]	-2.0888	7.1687e-38
A_24_P475349	NM_016577	RAB6B	Homo sapiens RAB6B, member RAS oncogene family (RAB6B), mRNA [NM_016577]	-2.0947	1.0882e-24
A_23_P258531	NM_002637	PHKA1	Homo sapiens phosphorylase kinase, alpha 1 (muscle) (PHKA1), mRNA [NM_002637]	-2.0977	2.0029e-19
A_23_P6596	NM_005524	HES1	Homo sapiens hairy and enhancer of split 1, (Drosophila) (HES1), mRNA [NM_005524]	-2.1013	1.7585e-20
A_23_P15995	NM_003830	SIGLEC5	Homo sapiens sialic acid binding Ig-like lectin 5 (SIGLEC5), mRNA [NM_003830]	-2.1022	0.0004
A_24_P478556	BC030102	BC030102	CDNA clone IMAGE:4796690	-2.1042	1.2089e-21
A_23_P213508	NM_000439	PCSK1	Homo sapiens proprotein convertase subtilisin [NM_000439]	-2.1046	7.7477e-13
A_23_P70398	NM_001025370	VEGF	Vascular endothelial growth factor	-2.1068	0
A_23_P320242	NM_152748	FLJ31340	Homo sapiens hypothetical protein FLJ31340 (FLJ31340), mRNA [NM_152748]	-2.1088	5.4932e-37
A_32_P43959	THC2648584	THC2648584	Unknown	-2.1105	4.0923e-28
A_24_P764690	CR611323	CR611323	full-length cDNA clone CS0DN002YO09 of Adult brain of Homo sapiens (human). [CR611323]	-2.1114	0.0004
A_23_P72096	NM_000575	IL1A	Homo sapiens interleukin 1, alpha (IL1A), mRNA [NM_000575]	-2.1124	3.0416e-33
A_23_P115998	NM_003120	SPI1	Homo sapiens spleen focus forming virus (SFFV) proviral integration oncogene spi1 (SPI1), mRNA [NM_003120]	-2.116	0
A_23_P500130	NM_153186	ANKRD15	KIAA0172 protein	-2.1171	1.4164e-09
A_23_P34548	NM_006642	SDCCAG8	Homo sapiens serologically defined colon cancer antigen 8 (SDCCAG8), mRNA [NM_006642]	-2.1176	3.0088e-25
A_23_P425880	NM_007118	TRIO	Homo sapiens triple functional domain (PTPRF interacting) (TRIO), mRNA [NM_007118]	-2.1183	0
A_32_P36905	THC2744969	THC2744969	Unknown	-2.1209	8.0703e-05
A_23_P255111	THC2545097	THC2545097	IBP7_HUMAN (Q16270) Insulin-like growth factor-binding protein 7 precursor (IGFBP-7) (IBP-7) (IGF-binding protein 7) (MAC25 protein) (Prostacyclin-stimulating factor) (PGI2-stimulating factor) (IGFBP-rP1), partial (58%) [THC2545097]	-2.1226	0.0001
A_24_P453970	THC2677783	THC2677783	Unknown	-2.1244	0.0003
A_32_P54128	THC2657493	THC2657493	Unknown	-2.1281	0.0001
A_23_P127948	NM_001124	ADM	Homo sapiens adrenomedullin (ADM), mRNA [NM_001124]	-2.1283	1.8559e-21
A_23_P363399	NM_030674	SLC38A1	Homo sapiens solute carrier family 38, member 1 (SLC38A1), mRNA [NM_030674]	-2.1288	1.3258e-11
A_32_P217500	NM_001040441	ZBTB8	Homo sapiens zinc finger and BTB domain containing 8 (ZBTB8), mRNA [NM_001040441]	-2.1299	4.5821e-10
A_24_P294842	NM_000332	ATXN1	Homo sapiens ataxin 1 (ATXN1), mRNA [NM_000332]	-2.1306	1.6278e-05
A_24_P618928	CR602022	CR602022	CDNA clone IMAGE:5268696	-2.1309	3.0914e-15
A_32_P194372	AK129547	AK129547	CDNA FLJ26036 fis, clone PRS00145	-2.1323	2.0069e-05
A_32_P82293	A_32_P82293	A_32_P82293	Unknown	-2.1327	6.5721e-05
A_23_P35082	NM_031459	SESN2	Homo sapiens sestrin 2 (SESN2), mRNA [NM_031459]	-2.1364	6.2596e-09
A_23_P72737	NM_003641	IFITM1	Homo sapiens interferon induced transmembrane protein 1 (9-27) (IFITM1), mRNA [NM_003641]	-2.1366	4.6087e-06
A_24_P928473	AK092832	TMEM116	Transmembrane protein 116	-2.1375	7.4274e-08
A_23_P59869	BC038207	AZGP1	Alpha-2-glycoprotein 1, zinc	-2.141	1.3189e-19
A_32_P331700	A_32_P331700	A_32_P331700	Unknown	-2.1435	3.2161e-31
A_24_P281264	A_24_P281264	A_24_P281264	Unknown	-2.1495	2.4166e-23
A_23_P31896	NM_003033	SIAT4A	ST3 beta-galactoside alpha-2,3-sialyltransferase 1	-2.1496	0
A_24_P85511	ENST00000376087	ANKRD26	Ankyrin repeat domain-containing protein 26. [Source:Uniprot/SWISSPROT;Acc:Q9UPS8] [ENST00000376087]	-2.1503	2.4709e-39
A_23_P21640	NM_001005273	CHD3	Chromodomain helicase DNA binding protein 3	-2.1509	1.5183e-08
A_24_P367602	NR_002834	DUSP5P	Homo sapiens dual specificity phosphatase 5 pseudogene (DUSP5P) on chromosome 1.	-2.1553	0.0001
A_24_P166311	NM_022090	LOC63920	Homo sapiens transposon-derived Buster3 transposase-like (LOC63920), mRNA [NM_022090]	-2.1567	9.1724e-25
A_32_P71744	BG695979	BG695979	Transcribed locus	-2.1593	2.6057e-09
A_23_P51187	NM_002744	PRKCZ	Homo sapiens protein kinase C, zeta (PRKCZ), mRNA [NM_002744]	-2.1597	0.0003
A_23_P258862	NM_145341	PDCD4	Homo sapiens programmed cell death 4 (neoplastic transformation inhibitor) (PDCD4), transcript variant 2, mRNA [NM_145341]	-2.1601	7.5544e-42
A_23_P20035	NM_138445	GPR146	G protein-coupled receptor 146	-2.1603	0
A_24_P80532	NM_004354	CCNG2	Homo sapiens cyclin G2 (CCNG2), mRNA [NM_004354]	-2.1622	5.755e-17
A_23_P22444	NM_002621	PFC	Homo sapiens properdin P factor, complement (PFC), mRNA [NM_002621]	-2.1639	0
A_24_P98109	NM_013322	SNX10	Homo sapiens sorting nexin 10 (SNX10), mRNA [NM_013322]	-2.1644	7.9927e-18
A_32_P78809	AF075063	AF075063	Full length insert cDNA YP99D02	-2.1649	0.0008
A_23_P9932	NM_145341	PDCD4	Homo sapiens programmed cell death 4 (neoplastic transformation inhibitor) (PDCD4), transcript variant 2, mRNA [NM_145341]	-2.1666	1.9372e-30
A_23_P40866	NM_015642	ZBTB20	Homo sapiens zinc finger and BTB domain containing 20 (ZBTB20), mRNA [NM_015642]	-2.1672	1.8067e-20
A_23_P352365	NM_001040441	ZBTB8	Homo sapiens zinc finger and BTB domain containing 8 (ZBTB8), mRNA [NM_001040441]	-2.1673	5.4954e-15
A_23_P16469	NM_001005377	PLAUR	Plasminogen activator, urokinase receptor	-2.1679	1.4609e-06
A_24_P343233	NM_002124	HLA-DRB1	Major histocompatibility complex, class II, DR beta 1	-2.1679	2.8813e-33
A_23_P401626	NM_174919	LOC201175	Hypothetical protein LOC201175	-2.1695	7.8619e-30
A_24_P411561	NM_032782	HAVCR2	Homo sapiens hepatitis A virus cellular receptor 2 (HAVCR2), mRNA [NM_032782]	-2.1721	1.4634e-38
A_23_P10356	NM_021777	ADAM28	ADAM metallopeptidase domain 28	-2.1725	2.0575e-22
A_23_P146551	NM_024761	MOBKL2B	Homo sapiens MOB1, Mps One Binder kinase activator-like 2B (yeast) (MOBKL2B), mRNA [NM_024761]	-2.1744	9.0111e-07
A_23_P61960	NM_145230	ATP6V0E2L	ATPase, H+ transporting V0 subunit E2-like (rat)	-2.1744	1.6602e-21
A_23_P214281	NM_133367	C6orf33	Homo sapiens chromosome 6 open reading frame 33 (C6orf33), mRNA [NM_133367]	-2.1753	9.2916e-16
A_24_P258846	NM_172390	NFATC1	Nuclear factor of activated T-cells, cytoplasmic, calcineurin-dependent 1	-2.1756	1.3658e-16
A_23_P376449	XR_016155	LOC642413	PREDICTED: Homo sapiens similar to Cathepsin L precursor (Major excreted protein) (MEP) (LOC642413), mRNA [XR_016155]	-2.1806	5.3943e-24
A_23_P37205	NM_201535	NDRG2	NDRG family member 2	-2.1839	8.4613e-24
A_32_P189034	THC2535223	THC2535223	BC000698 keratin 18 {Homo sapiens} (exp=-1; wgp=0; cg=0), partial (19%) [THC2535223]	-2.185	4.7099e-20
A_24_P253100	NM_001002811	PDE4DIP	Phosphodiesterase 4D interacting protein (myomegalin)	-2.1853	1.2357e-25
A_23_P99285	NM_006143	GPR19	Homo sapiens G protein-coupled receptor 19 (GPR19), mRNA [NM_006143]	-2.1863	5.5841e-13
A_32_P183609	NM_001040445	ASB1	Homo sapiens ankyrin repeat and SOCS box-containing 1 (ASB1), mRNA [NM_001040445]	-2.1878	3.1015e-25
A_23_P218086	AB032995	TPCN1	Homo sapiens mRNA for KIAA1169 protein, partial cds. [AB032995]	-2.1906	0
A_24_P732106	THC2635964	THC2635964	Q4WTS6_ASPFU (Q4WTS6) Peptidyl-tRNA hydrolase, partial (6%) [THC2635964]	-2.1911	7.4004e-15
A_24_P97405	NM_003965	CCRL2	Chemokine (C-C motif) receptor-like 2	-2.1913	0
A_23_P144807	AF440762	2011-09-08	KIAA0202 protein	-2.1917	2.7542e-09
A_24_P418816	NM_015696	GPX7	Homo sapiens glutathione peroxidase 7 (GPX7), mRNA [NM_015696]	-2.1921	4.3915e-06
A_23_P212159	NM_024923	NUP210	Homo sapiens nucleoporin 210kDa (NUP210), mRNA [NM_024923]	-2.1935	4.6899e-37
A_24_P230938	BC022054	C10orf83	Chromosome 10 open reading frame 83	-2.1936	0
A_32_P12703	THC2697162	THC2697162	Unknown	-2.195	2.5856e-23
A_24_P374634	AK002152	STAU2	Homo sapiens cDNA FLJ11290 fis, clone PLACE1009622, weakly similar to MATERNAL EFFECT PROTEIN STAUFEN. [AK002152]	-2.1951	3.3561e-09
A_23_P160720	NM_018664	SNFT	Homo sapiens Jun dimerization protein p21SNFT (SNFT), mRNA [NM_018664]	-2.1953	0
A_24_P56363	NM_030925	CAB39L	Homo sapiens calcium binding protein 39-like (CAB39L), mRNA [NM_030925]	-2.1955	1.5701e-06
A_24_P773012	THC2586092	THC2586092	COR1A_HUMAN (P31146) Coronin-1A (Coronin-like protein p57) (Coronin-like protein A) (CLIPINA) (Tryptophan aspartate-containing coat protein) (TACO), partial (70%) [THC2586092]	-2.1955	1.8971e-26
A_24_P300021	NM_006884	SHOX2	Short stature homeobox 2	-2.1979	1.195e-05
A_24_P295791	NM_032564	DGAT2	Homo sapiens diacylglycerol O-acyltransferase homolog 2 (mouse) (DGAT2), mRNA [NM_032564]	-2.1995	4.4965e-08
A_23_P148422	NM_004845	PCYT1B	Homo sapiens phosphate cytidylyltransferase 1, choline, beta isoform (PCYT1B), mRNA [NM_004845]	-2.1999	1.1816e-07
A_23_P126540	NM_020683	AD026	Homo sapiens AD026 protein (AD026), mRNA [NM_020683]	-2.2022	3.5514e-06
A_23_P73150	NM_031421	DKFZP434H0115	Homo sapiens hypothetical protein DKFZp434H0115 (DKFZP434H0115), mRNA [NM_031421]	-2.205	0
A_24_P165864	NM_014879	GPR105	Purinergic receptor P2Y, G-protein coupled, 14	-2.2089	1.5622e-29
A_24_P453819	BC067907	MSN	Moesin	-2.2136	2.7522e-42
A_24_P131718	NM_016577	RAB6B	Homo sapiens RAB6B, member RAS oncogene family (RAB6B), mRNA [NM_016577]	-2.2169	2.7857e-34
A_24_P98047	NM_018593	SLC16A10	Homo sapiens solute carrier family 16 (monocarboxylic acid transporters), member 10 (SLC16A10), mRNA [NM_018593]	-2.2179	4.6955e-11
A_23_P500300	NM_033229	TRIM15	Tripartite motif-containing 15	-2.2235	5.5393e-30
A_24_P337000	NM_020458	TTC7A	KIAA1140 protein	-2.2252	0
A_32_P166272	THC2650457	THC2650457	ALU6_HUMAN (P39193) Alu subfamily SP sequence contamination warning entry, partial (12%) [THC2650457]	-2.2298	4.2655e-07
A_24_P25437	BC016338	FLJ33860	Hypothetical protein FLJ33860	-2.2298	1.5567e-15
A_32_P231415	AF132203	PRO1933	PRO1933	-2.2395	0
A_24_P697685	AJ697972	FAM62C	chr3 synaptotagmin	-2.2403	2.575e-05
A_23_P302634	NM_173591	FLJ90579	Homo sapiens hypothetical protein FLJ90579 (FLJ90579), mRNA [NM_173591]	-2.241	0.0004
A_23_P106145	NM_014584	ERO1L	Homo sapiens ERO1-like (S. cerevisiae) (ERO1L), mRNA [NM_014584]	-2.246	1.0774e-12
A_24_P334640	NM_133367	C6orf33	Homo sapiens chromosome 6 open reading frame 33 (C6orf33), mRNA [NM_133367]	-2.251	1.0241e-10
A_23_P49338	NM_016639	TNFRSF12A	type I transmembrane protein Fn14	-2.2511	3.8322e-20
A_23_P101407	NM_000064	C3	Homo sapiens complement component 3 (C3), mRNA [NM_000064]	-2.2512	9.8629e-05
A_23_P92334	NM_024943	FLJ23235	Homo sapiens hypothetical protein FLJ23235 (FLJ23235), mRNA [NM_024943]	-2.2521	1.0164e-34
A_32_P108436	NM_001040441	ZBTB8	Homo sapiens zinc finger and BTB domain containing 8 (ZBTB8), mRNA [NM_001040441]	-2.2532	1.6559e-24
A_24_P88690	NM_000578	SLC11A1	Homo sapiens solute carrier family 11 (proton-coupled divalent metal ion transporters), member 1 (SLC11A1), mRNA [NM_000578]	-2.2538	3.3886e-08
A_23_P323751	NM_030919	C20orf129	Homo sapiens chromosome 20 open reading frame 129 (C20orf129), mRNA [NM_030919]	-2.2539	4.744e-21
A_24_P127159	M69012	LOC493754	RAB guanine nucleotide exchange factor (GEF) 1 pseudogene	-2.2592	5.221e-06
A_23_P371824	NM_020127	TUFT1	Homo sapiens tuftelin 1 (TUFT1), mRNA [NM_020127]	-2.2647	0.0003
A_32_P74752	AK130456	AK130456	CDNA FLJ26946 fis, clone RCT08108	-2.2662	1.2516e-21
A_24_P30923	NM_003498	SNN	Homo sapiens stannin (SNN), mRNA [NM_003498]	-2.2678	4.0416e-15
A_32_P45780	THC2622569	THC2622569	Q9M1T1_ARATH (Q9M1T1) Sugar-phosphate isomerase-like protein, partial (5%) [THC2622569]	-2.27	0
A_23_P335452	NM_153367	C10orf56	Homo sapiens chromosome 10 open reading frame 56 (C10orf56), mRNA [NM_153367]	-2.2716	1.2955e-08
A_24_P410498	AK093607	WDFY4	KIAA1607 protein	-2.2718	1.7321e-23
A_24_P390784	NM_001005291	SREBF1	Sterol regulatory element binding transcription factor 1	-2.2784	8.3286e-26
A_24_P413920	NM_145175	NSE1	Homo sapiens NSE1 (NSE1), mRNA [NM_145175]	-2.2805	5.1247e-17
A_32_P69333	BX956036	BX956036	Transcribed locus, strongly similar to XP_373489.1 PREDICTED: hypothetical protein XP_373489 [Homo sapiens]	-2.2825	1.5834e-13
A_23_P34676	NM_198053	CD3Z	Homo sapiens CD3Z antigen, zeta polypeptide (TiT3 complex) (CD3Z), transcript variant 1, mRNA [NM_198053]	-2.283	1.9822e-21
A_23_P106806	NM_031948	MPN	Homo sapiens pancreasin (MPN), mRNA [NM_031948]	-2.2875	3.874e-05
A_23_P431346	NM_175887	LOC222171	Homo sapiens hypothetical protein LOC222171 (LOC222171), mRNA [NM_175887]	-2.2884	2.6272e-05
A_23_P257743	NM_003028	SHB	Homo sapiens SHB (Src homology 2 domain containing) adaptor protein B (SHB), mRNA [NM_003028]	-2.2901	0.0003
A_32_P126485	BC047032	PDE4DIP	Phosphodiesterase 4D interacting protein (myomegalin)	-2.2908	5.8802e-15
A_24_P923676	X15674	pTR5 mRNA	PTR5 mRNA for repetitive sequence	-2.294	2.3463e-18
A_24_P271323	NM_030777	SLC2A10	Homo sapiens solute carrier family 2 (facilitated glucose transporter), member 10 (SLC2A10), mRNA [NM_030777]	-2.2964	6.5074e-35
A_32_P23872	A_32_P23872	A_32_P23872	Unknown	-2.2973	5.573e-24
A_32_P125103	AA902595	IQGAP1	IQ motif containing GTPase activating protein 1	-2.2974	7.0155e-05
A_24_P923370	NM_032782	HAVCR2	Homo sapiens hepatitis A virus cellular receptor 2 (HAVCR2), mRNA [NM_032782]	-2.3019	5.4524e-37
A_23_P165219	NM_032152	PRAM-1	Homo sapiens PRAM-1 protein (PRAM-1), mRNA [NM_032152]	-2.3022	1.1965e-37
A_23_P145841	NM_015464	SOSTDC1	Homo sapiens sclerostin domain containing 1 (SOSTDC1), mRNA [NM_015464]	-2.3047	1.3188e-12
A_24_P407311	NM_014584	ERO1L	Homo sapiens ERO1-like (S. cerevisiae) (ERO1L), mRNA [NM_014584]	-2.3057	0
A_23_P46390	NM_032872	SYTL1	Homo sapiens synaptotagmin-like 1 (SYTL1), mRNA [NM_032872]	-2.3067	5.4275e-35
A_23_P40880	NM_178868	CKLFSF8	Homo sapiens chemokine-like factor super family 8 (CKLFSF8), mRNA [NM_178868]	-2.3073	1.0831e-07
A_24_P11462	NM_052998	ODC-p	Homo sapiens ornithine decarboxylase-like (ODC-p), mRNA [NM_052998]	-2.3075	0.0007
A_24_P759496	AK096685	FAM107B	hypothetical protein MGC11034	-2.3081	8.4444e-18
A_23_P138655	NM_057157	CYP26A1	Homo sapiens cytochrome P450, family 26, subfamily A, polypeptide 1 (CYP26A1), transcript variant 2, mRNA [NM_057157]	-2.3089	3.3346e-10
A_23_P168211	NM_030796	DKFZP564K0822	Homo sapiens hypothetical protein DKFZp564K0822 (DKFZP564K0822), mRNA [NM_030796]	-2.3115	2.1999e-21
A_23_P38876	NM_005357	LIPE	Homo sapiens lipase, hormone-sensitive (LIPE), mRNA [NM_005357]	-2.3132	1.4785e-07
A_32_P167076	AK092257	CAPN14	Calpain 14	-2.3141	3.8714e-07
A_32_P134056	AK055497	DOCK4	Homo sapiens cDNA FLJ30935 fis, clone FEBRA2007176.	-2.3148	0.0002
A_23_P410965	NM_020888	KIAA1522	KIAA1522 protein	-2.3158	7.7584e-13
A_24_P479793	THC2707492	THC2707492	Unknown	-2.3169	4.32e-20
A_23_P252556	NM_001704	BAI3	Homo sapiens brain-specific angiogenesis inhibitor 3 (BAI3), mRNA [NM_001704]	-2.318	6.1539e-09
A_23_P79518	NM_000576	IL1B	Homo sapiens interleukin 1, beta (IL1B), mRNA [NM_000576]	-2.3181	1.7439e-18
A_24_P838448	AK022865	FLJ22536	Hypothetical locus LOC401237	-2.319	5.508e-30
A_23_P204879	NM_030925	CAB39L	Homo sapiens calcium binding protein 39-like (CAB39L), mRNA [NM_030925]	-2.3193	0
A_23_P48570	NM_182908	DHRS2	Homo sapiens dehydrogenase/reductase (SDR family) member 2 (DHRS2), transcript variant 1, mRNA [NM_182908]	-2.3202	5.5035e-18
A_23_P72770	NM_032147	USP44	Homo sapiens ubiquitin specific protease 44 (USP44), mRNA [NM_032147]	-2.3281	1.4516e-05
A_32_P117464	NM_178496	LOC151963	Homo sapiens similar to BcDNA:GH11415 gene product (LOC151963), mRNA [NM_178496]	-2.3293	9.0731e-21
A_23_P308763	NM_005766	FARP1	Homo sapiens FERM, RhoGEF (ARHGEF) and pleckstrin domain protein 1 (chondrocyte-derived) (FARP1), transcript variant 1, mRNA [NM_005766]	-2.3296	0
A_24_P373562	NM_018404	CENTA2	Homo sapiens centaurin, alpha 2 (CENTA2), mRNA [NM_018404]	-2.3304	4.0522e-10
A_23_P39525	NM_024785	FLJ22746	Homo sapiens hypothetical protein FLJ22746 (FLJ22746), mRNA [NM_024785]	-2.3312	1.8497e-36
A_23_P254688	NM_023943	MGC3040	Homo sapiens hypothetical protein MGC3040 (MGC3040), mRNA [NM_023943]	-2.3325	1.1003e-09
A_23_P167509	NM_001037332	CYFIP2	cytoplasmic FMRP interacting protein 2	-2.3341	1.7886e-06
A_24_P208345	NM_033102	PCANAP6	Homo sapiens prostate cancer associated protein 6 (PCANAP6), mRNA [NM_033102]	-2.3367	8.3125e-10
A_24_P324886	NM_014705	DOCK4	Homo sapiens dedicator of cytokinesis 4 (DOCK4), mRNA [NM_014705]	-2.3375	1.7847e-10
A_24_P410363	NM_022051	EGLN1	Homo sapiens egl nine homolog 1 (C. elegans) (EGLN1), mRNA [NM_022051]	-2.3424	2.392e-42
A_23_P36345	NM_006645	STARD10	Homo sapiens START domain containing 10 (STARD10), mRNA [NM_006645]	-2.3424	0
A_23_P207037	NM_007261	CMRF-35H	Homo sapiens leukocyte membrane antigen (CMRF-35H), mRNA [NM_007261]	-2.344	2.0634e-24
A_23_P131255	NM_015535	DNAPTP6	Homo sapiens DNA polymerase-transactivated protein 6 (DNAPTP6), mRNA [NM_015535]	-2.346	1.2337e-14
A_24_P743802	AJ420454	LOC286334	Hypothetical protein LOC286334	-2.3482	4.9549e-05
A_32_P148075	AK092349	AK092349	CDNA FLJ35030 fis, clone OCBBF2015931	-2.3524	0.0009
A_32_P127019	THC2701088	THC2701088	Unknown	-2.3525	6.7789e-11
A_23_P40240	NM_001336	CTSZ	Homo sapiens cathepsin Z (CTSZ), mRNA [NM_001336]	-2.3533	1.0771e-16
A_23_P332374	NM_007147	ZNF175	Homo sapiens zinc finger protein 175 (ZNF175), mRNA [NM_007147]	-2.3551	1.7763e-18
A_32_P50275	AK095453	CD59	CD59 molecule, complement regulatory protein	-2.3566	9.9848e-05
A_23_P76015	NM_014786	ARHGEF17	Homo sapiens Rho guanine nucleotide exchange factor (GEF) 17 (ARHGEF17), mRNA [NM_014786]	-2.3571	0.0001
A_24_P297182	NM_004121	GGTLA1	Homo sapiens gamma-glutamyltransferase-like activity 1 (GGTLA1), mRNA [NM_004121]	-2.3587	1.0914e-10
A_24_P916266	BC007778	ZNF175	Zinc finger protein 175	-2.361	2.6928e-11
A_23_P78053	NM_030802	LOC81558	Homo sapiens C [NM_030802]	-2.3613	0
A_32_P112331	AK026225	PLD1	Phospholipase D1, phosphatidylcholine-specific	-2.3613	2.7964e-05
A_24_P309645	NM_017901	TPCN1	Homo sapiens two pore segment channel 1 (TPCN1), mRNA [NM_017901]	-2.3621	2.8856e-08
A_32_P39669	THC2519054	THC2519054	Q5W0G2_HUMAN (Q5W0G2) Ankyrin repeat domain 18B, partial (11%) [THC2519054]	-2.3638	7.9562e-05
A_24_P935330	AJ002788	PRKCB1	Protein kinase C, beta 1	-2.3659	1.7175e-20
A_23_P160618	NM_003975	SH2D2A	Homo sapiens SH2 domain protein 2A (SH2D2A), mRNA [NM_003975]	-2.367	4.9488e-22
A_23_P31893	NM_003033	SIAT4A	ST3 beta-galactoside alpha-2,3-sialyltransferase 1	-2.3723	3.1886e-23
A_23_P500501	NM_000142	FGFR3	Fibroblast growth factor receptor 3 (achondroplasia, thanatophoric dwarfism)	-2.3729	7.1305e-14
A_23_P30666	NM_014452	TNFRSF21	Homo sapiens tumor necrosis factor receptor superfamily, member 21 (TNFRSF21), mRNA [NM_014452]	-2.3738	4.8674e-11
A_32_P162605	DQ786266	DQ786266	Homo sapiens clone HLS_IMAGE_298862 mRNA sequence. [DQ786266]	-2.3744	0
A_24_P123190	NM_002662	PLD1	Homo sapiens phospholipase D1, phophatidylcholine-specific (PLD1), mRNA [NM_002662]	-2.3796	6.6049e-24
A_23_P501538	NM_153631	HOXA3	Homo sapiens homeo box A3 (HOXA3), transcript variant 2, mRNA [NM_153631]	-2.3811	9.3258e-17
A_32_P327750	XR_019306	LOC401708	PREDICTED: Homo sapiens similar to Glutamine synthetase (Glutamate--ammonia ligase) (GS) (LOC401708), mRNA [XR_019306]	-2.3833	1.2418e-28
A_23_P208340	NM_020428	CTL2	Homo sapiens CTL2 gene (CTL2), mRNA [NM_020428]	-2.3858	3.1398e-10
A_24_P105733	NM_022648	TNS	Homo sapiens tensin (TNS), mRNA [NM_022648]	-2.3862	0.001
A_32_P179396	NM_024867	FLJ23577	Homo sapiens KPL2 protein (FLJ23577), transcript variant 1, mRNA [NM_024867]	-2.387	0.0004
A_24_P61537	NM_001823	CKB	Homo sapiens creatine kinase, brain (CKB), mRNA [NM_001823]	-2.3897	2.0044e-16
A_23_P216708	NM_018339	RFK	Homo sapiens riboflavin kinase (RFK), mRNA [NM_018339]	-2.3909	2.4844e-32
A_23_P5460	NM_017521	FEV	Homo sapiens FEV (ETS oncogene family) (FEV), mRNA [NM_017521]	-2.3909	1.3483e-10
A_24_P12401	NM_001025366	VEGF	Vascular endothelial growth factor	-2.3929	0
A_23_P65278	NM_015678	NBEA	Homo sapiens neurobeachin (NBEA), mRNA [NM_015678]	-2.3943	5.5381e-10
A_24_P62530	NM_021205	RHOU	Homo sapiens ras homolog gene family, member U (RHOU), mRNA [NM_021205]	-2.3964	0.0006
A_32_P217773	NM_032872	SYTL1	Homo sapiens synaptotagmin-like 1 (SYTL1), mRNA [NM_032872]	-2.397	1.0354e-17
A_23_P18903	NM_032782	HAVCR2	Homo sapiens hepatitis A virus cellular receptor 2 (HAVCR2), mRNA [NM_032782]	-2.3979	0
A_32_P132300	AA731356	MS4A6A	Membrane-spanning 4-domains, subfamily A, member 6A	-2.4017	0.0002
A_32_P156628	BQ379494	GLUL	Glutamate-ammonia ligase (glutamine synthetase)	-2.4023	8.2693e-11
A_23_P357104	NM_001155	ANXA6	Annexin A6	-2.4038	2.8521e-16
A_23_P162142	NM_015516	TSK	Homo sapiens likely ortholog of chicken tsukushi (TSK), mRNA [NM_015516]	-2.4058	1.9327e-07
A_32_P201616	A_32_P201616	A_32_P201616	Unknown	-2.407	0
A_23_P45011	NM_030949	PPP1R14C	Homo sapiens protein phosphatase 1, regulatory (inhibitor) subunit 14C (PPP1R14C), mRNA [NM_030949]	-2.413	9.2351e-05
A_23_P353035	NM_001553	IGFBP7	Homo sapiens insulin-like growth factor binding protein 7 (IGFBP7), mRNA [NM_001553]	-2.4164	5.2614e-05
A_23_P389692	NM_020776	KIAA1328	Homo sapiens KIAA1328 protein (KIAA1328), mRNA [NM_020776]	-2.4167	4.1845e-08
A_23_P78608	NM_024898	FAM31C	Homo sapiens family with sequence similarity 31, member C (FAM31C), mRNA [NM_024898]	-2.4197	3.903e-35
A_23_P128919	NM_002306	LGALS3	Lectin, galactoside-binding, soluble, 3 (galectin 3)	-2.4206	1.2415e-05
A_23_P147166	AF516696	CACNA2D3	Calcium channel, voltage-dependent, alpha 2/delta 3 subunit	-2.422	1.3325e-08
A_24_P261567	NM_030792	PP1665	Homo sapiens hypothetical protein PP1665 (PP1665), mRNA [NM_030792]	-2.4247	1.8648e-13
A_24_P277211	NM_000861	HRH1	Histamine receptor H1	-2.4264	1.4013e-45
A_23_P7033	NM_022149	MAGEF1	Homo sapiens melanoma antigen, family F, 1 (MAGEF1), mRNA [NM_022149]	-2.4271	0
A_23_P502314	NM_078481	CD97	CD97 molecule	-2.4306	3.1335e-30
A_24_P324630	AL832942	SBF2	KIAA1766 protein	-2.4323	2.7634e-31
A_24_P408457	NM_000262	NAGA	Homo sapiens N-acetylgalactosaminidase, alpha- (NAGA), mRNA [NM_000262]	-2.4355	3.6294e-43
A_24_P325533	A_24_P325533	A_24_P325533	Unknown	-2.4359	1.4475e-12
A_32_P200947	BC035518	BC035518	Homo sapiens, clone IMAGE:4214654, mRNA	-2.4366	1.8672e-21
A_32_P130788	NM_001010971	SAMD13	Sterile alpha motif domain containing 13	-2.437	0
A_32_P89997	THC2671278	THC2671278	ALU1_HUMAN (P39188) Alu subfamily J sequence contamination warning entry, partial (6%) [THC2671278]	-2.4385	0
A_23_P154962	BC035246	KIAA1666	KIAA1666 protein	-2.4388	2.6151e-20
A_24_P68079	ENST00000301807	LBA1	CDNA FLJ39359 fis, clone PEBLM2004290. (Fragment). [Source:Uniprot/SPTREMBL;Acc:Q8N8K0] [ENST00000301807]	-2.4412	5.6921e-34
A_23_P91859	ENST00000301807	LBA1	CDNA FLJ39359 fis, clone PEBLM2004290. (Fragment). [Source:Uniprot/SPTREMBL;Acc:Q8N8K0] [ENST00000301807]	-2.4432	2.5494e-40
A_23_P28530	NM_017694	FLJ20160	Homo sapiens FLJ20160 protein (FLJ20160), mRNA [NM_017694]	-2.445	1.1781e-09
A_23_P2901	AK000041	C14orf49	hypothetical protein FLJ20034	-2.447	5.1652e-19
A_23_P61140	NM_006480	RGS14	Homo sapiens regulator of G-protein signalling 14 (RGS14), mRNA [NM_006480]	-2.4476	1.0481e-08
A_23_P420281	NM_002738	PRKCB1	Protein kinase C, beta 1	-2.4537	0.0007
A_23_P57658	NM_020386	HRASLS	Homo sapiens HRAS-like suppressor (HRASLS), mRNA [NM_020386]	-2.4539	3.7998e-23
A_24_P256404	AK093202	LOC440570	CDNA FLJ35883 fis, clone TESTI2008929	-2.4542	1.0927e-05
A_32_P102718	AA315353	FLJ45055	Hypothetical protein LOC644128	-2.4556	0
A_23_P300714	NM_005775	SCAM-1	Homo sapiens vinexin beta (SH3-containing adaptor molecule-1) (SCAM-1), mRNA [NM_005775]	-2.4571	9.6391e-37
A_32_P34920	NM_004472	FOXD1	Homo sapiens forkhead box D1 (FOXD1), mRNA [NM_004472]	-2.464	4.7577e-12
A_23_P150057	NM_024756	MMRN2	Homo sapiens multimerin 2 (MMRN2), mRNA [NM_024756]	-2.4657	3.5268e-16
A_23_P155335	NM_002662	PLD1	Homo sapiens phospholipase D1, phophatidylcholine-specific (PLD1), mRNA [NM_002662]	-2.4663	1.1183e-05
A_23_P94800	NM_002961	S100A4	S100 calcium binding protein A4 (calcium protein, calvasculin, metastasin, murine placental homolog)	-2.467	0
A_24_P482104	THC2725128	THC2725128	CD688871 EST5393 human nasopharynx Homo sapiens cDNA, mRNA sequence [CD688871]	-2.4679	8.2809e-16
A_24_P402825	NM_018398	CACNA2D3	Homo sapiens calcium channel, voltage-dependent, alpha 2/delta 3 subunit (CACNA2D3), mRNA [NM_018398]	-2.4759	2.251e-09
A_24_P246626	ENST00000308384	ENST00000308384	similar to HLA class II histocompatibility antigen, DP alpha chain precursor (HLA-SB alpha chain) (MHC class II DP3-alpha) (DP(W3)) (DP(W4)) (LOC642074), mRNA [Source:RefSeq_dna;Acc:XR_018081] [ENST00000308384]	-2.4778	0.0003
A_23_P14559	NM_006871	RIPK3	Homo sapiens receptor-interacting serine-threonine kinase 3 (RIPK3), mRNA [NM_006871]	-2.4802	2.6563e-06
A_24_P410536	AB037728	ZUBR1	KIAA1307 protein	-2.4843	1.6568e-25
A_23_P250564	NM_005400	PRKCE	Homo sapiens protein kinase C, epsilon (PRKCE), mRNA [NM_005400]	-2.4846	2.068e-07
A_24_P364807	BX641069	CAPNS2	hypothetical protein MGC12536	-2.4861	6.5314e-28
A_23_P22682	NM_016608	ARMCX1	Homo sapiens armadillo repeat containing, X-linked 1 (ARMCX1), mRNA [NM_016608]	-2.4864	2.9253e-09
A_23_P211522	NM_145738	SYNGR1	Synaptogyrin 1	-2.4866	3.0831e-05
A_32_P339640	NM_173644	FLJ33860	Homo sapiens hypothetical protein FLJ33860 (FLJ33860), mRNA [NM_173644]	-2.4891	7.2096e-22
A_24_P941353	NM_004845	PCYT1B	Homo sapiens phosphate cytidylyltransferase 1, choline, beta isoform (PCYT1B), mRNA [NM_004845]	-2.4929	4.1355e-31
A_23_P87150	NM_004811	LPXN	Homo sapiens leupaxin (LPXN), mRNA [NM_004811]	-2.4948	0
A_23_P67847	NM_024572	GALNT14	Homo sapiens UDP-N-acetyl-alpha-D-galactosamine:polypeptide N-acetylgalactosaminyltransferase 14 (GalNAc-T14) (GALNT14), mRNA [NM_024572]	-2.4984	4.6034e-27
A_32_P29618	CR617033	CR617033	Full-length cDNA clone CS0DI009YL06 of Placenta Cot 25-normalized of Homo sapiens (human)	-2.4996	0.0006
A_32_P188953	NM_001005732	C21orf34	Chromosome 21 open reading frame 34	-2.4997	2.082e-26
A_23_P73972	NM_015696	GPX7	Homo sapiens glutathione peroxidase 7 (GPX7), mRNA [NM_015696]	-2.5011	3.9646e-08
A_23_P54878	NM_002209	ITGAL	Homo sapiens integrin, alpha L (antigen CD11A (p180), lymphocyte function-associated antigen 1; alpha polypeptide) (ITGAL), mRNA [NM_002209]	-2.5043	1.1246e-10
A_23_P121885	NM_031916	ROPN1L	Homo sapiens ropporin 1-like (ROPN1L), mRNA [NM_031916]	-2.505	0
A_23_P105251	NM_005269	GLI1	Homo sapiens glioma-associated oncogene homolog (zinc finger protein) (GLI), mRNA [NM_005269]	-2.5058	6.7155e-07
A_24_P73599	NM_172217	IL16	Homo sapiens interleukin 16 (lymphocyte chemoattractant factor) (IL16), transcript variant 2, mRNA [NM_172217]	-2.5096	0
A_23_P42306	NM_006120	HLA-DMA	Homo sapiens major histocompatibility complex, class II, DM alpha (HLA-DMA), mRNA [NM_006120]	-2.5154	2.7699e-23
A_23_P51986	NM_181873	MTMR11	cisplatin resistance associated	-2.5168	2.6653e-20
A_23_P120227	NM_030915	LBH	Homo sapiens likely ortholog of mouse limb-bud and heart gene (LBH), mRNA [NM_030915]	-2.5178	8.7997e-05
A_23_P97700	NM_006472	TXNIP	Homo sapiens thioredoxin interacting protein (TXNIP), mRNA [NM_006472]	-2.5204	0
A_24_P212997	XR_019070	LOC343981	PREDICTED: Homo sapiens similar to Glutamine synthetase (Glutamate--ammonia ligase) (GS) (LOC343981), mRNA [XR_019070]	-2.5241	1.7486e-40
A_24_P50245	NM_006120	HLA-DMA	Homo sapiens major histocompatibility complex, class II, DM alpha (HLA-DMA), mRNA [NM_006120]	-2.5249	0
A_23_P149695	BC098428	ATP1A1	ATPase, Na+/K+ transporting, alpha 1 polypeptide	-2.5288	1.4075e-25
A_32_P45297	THC2653459	THC2653459	AC134346 hypothetcial protein {Oryza sativa (japonica cultivar-group)} (exp=0; wgp=1; cg=0), partial (6%) [THC2653459]	-2.5302	4.9849e-05
A_23_P167920	NM_005618	DLL1	Homo sapiens delta-like 1 (Drosophila) (DLL1), mRNA [NM_005618]	-2.5336	1.1305e-05
A_32_P116203	NM_000265	NCF1	Neutrophil cytosolic factor 1, (chronic granulomatous disease, autosomal 1)	-2.5375	6.6652e-07
A_23_P53257	BX647344	AVIL	advillin	-2.5378	6.5066e-10
A_23_P4494	NM_024422	DSC2	Homo sapiens desmocollin 2 (DSC2), transcript variant Dsc2a, mRNA [NM_024422]	-2.5406	2.0753e-30
A_24_P105933	NM_004624	VIPR1	Homo sapiens vasoactive intestinal peptide receptor 1 (VIPR1), mRNA [NM_004624]	-2.5467	5.3292e-11
A_23_P119042	NM_005601	NKG7	Natural killer cell group 7 sequence	-2.55	3.704e-31
A_32_P154911	NM_175887	LOC222171	Homo sapiens hypothetical protein LOC222171 (LOC222171), mRNA [NM_175887]	-2.5585	9.8928e-06
A_24_P22079	NM_002015	FOXO1A	Homo sapiens forkhead box O1A (rhabdomyosarcoma) (FOXO1A), mRNA [NM_002015]	-2.5605	5.8689e-06
A_23_P259621	NM_032464	WBSCR5	Homo sapiens Williams-Beuren syndrome chromosome region 5 (WBSCR5), transcript variant 4, mRNA [NM_032464]	-2.5726	0
A_32_P55840	ENST00000377186	ENST00000377186	BX118328 Soares fetal liver spleen 1NFLS Homo sapiens cDNA clone IMAGp998P02124, mRNA sequence [BX118328]	-2.5746	4.6043e-05
A_23_P500614	NM_001243	TNFRSF8	Homo sapiens tumor necrosis factor receptor superfamily, member 8 (TNFRSF8), transcript variant 1, mRNA [NM_001243]	-2.5772	8.0822e-37
A_23_P149975	NM_031453	C10orf45	Homo sapiens chromosome 10 open reading frame 45 (C10orf45), mRNA [NM_031453]	-2.583	1.1579e-35
A_23_P306211	NM_145175	NSE1	Homo sapiens NSE1 (NSE1), mRNA [NM_145175]	-2.5854	2.6648e-07
A_24_P11142	NM_014656	KIAA0040	Homo sapiens KIAA0040 gene product (KIAA0040), mRNA [NM_014656]	-2.5882	0.0001
A_23_P138635	NM_004052	BNIP3	BCL2/adenovirus E1B 19kDa interacting protein 3	-2.5952	0
A_23_P391198	NM_001002233	RAB11FIP1	hypothetical protein FLJ22622	-2.5955	5.5172e-06
A_23_P343935	NM_022051	EGLN1	Homo sapiens egl nine homolog 1 (C. elegans) (EGLN1), mRNA [NM_022051]	-2.596	0
A_23_P311869	NM_003896	SIAT9	Homo sapiens sialyltransferase 9 (CMP-NeuAc:lactosylceramide alpha-2,3-sialyltransferase; GM3 synthase) (SIAT9), mRNA [NM_003896]	-2.5974	1.9893e-28
A_23_P215479	NM_003388	CYLN2	Neutrophil cytosolic factor 1, (chronic granulomatous disease, autosomal 1)	-2.598	2.4872e-38
A_23_P107351	BC051787	NALP1	Homo sapiens NACHT, leucine rich repeat and PYD (pyrin domain) containing 1, mRNA (cDNA clone MGC:57544 IMAGE:5756099), complete cds. [BC051787]	-2.6002	5.6052e-45
A_23_P23797	NM_133326	ATP6V1G3	Homo sapiens ATPase, H+ transporting, lysosomal 13kDa, V1 subunit G isoform 3 (ATP6V1G3), transcript variant 2, mRNA [NM_133326]	-2.6014	3.7815e-07
A_24_P146575	NM_003028	SHB	Homo sapiens SHB (Src homology 2 domain containing) adaptor protein B (SHB), mRNA [NM_003028]	-2.6017	3.508e-08
A_24_P32085	NM_024761	MOBKL2B	Homo sapiens MOB1, Mps One Binder kinase activator-like 2B (yeast) (MOBKL2B), mRNA [NM_024761]	-2.6051	1.1921e-06
A_23_P25674	NM_001823	CKB	Homo sapiens creatine kinase, brain (CKB), mRNA [NM_001823]	-2.6084	2.6073e-17
A_23_P65629	NM_021161	KCNK10	Homo sapiens potassium channel, subfamily K, member 10 (KCNK10), transcript variant 1, mRNA [NM_021161]	-2.6103	2.2899e-06
A_23_P394064	NM_012232	PTRF	Homo sapiens polymerase I and transcript release factor (PTRF), mRNA [NM_012232]	-2.6131	0.0004
A_23_P47924	NM_002849	PTPRR	Homo sapiens protein tyrosine phosphatase, receptor type, R (PTPRR), transcript variant 1, mRNA [NM_002849]	-2.6156	9.9994e-16
A_24_P237586	NM_181726	Lrp2bp	Homo sapiens low density lipoprotein receptor-related protein binding protein (Lrp2bp), mRNA [NM_181726]	-2.6171	7.567e-44
A_23_P306215	NM_145175	NSE1	Homo sapiens NSE1 (NSE1), mRNA [NM_145175]	-2.6194	1.67e-08
A_23_P100022	NM_014848	SV2B	Homo sapiens synaptic vesicle glycoprotein 2B (SV2B), mRNA [NM_014848]	-2.6212	4.1137e-27
A_23_P118712	ENST00000324677	ENST00000324677	Protein phosphatase Slingshot homolog 2 (EC 3.1.3.48) (EC 3.1.3.16) (SSH-2L) (hSSH-2L). [Source:Uniprot/SWISSPROT;Acc:Q76I76] [ENST00000324677]	-2.6233	2.5924e-43
A_24_P930088	AK123264	AK123264	CDNA FLJ41270 fis, clone BRAMY2036387	-2.6235	4.33e-05
A_23_P36753	NM_000690	ALDH2	Homo sapiens aldehyde dehydrogenase 2 family (mitochondrial) (ALDH2), nuclear gene encoding mitochondrial protein, mRNA [NM_000690]	-2.6248	2.0438e-16
A_24_P233406	THC2733540	THC2733540	Unknown	-2.6292	3.1545e-10
A_23_P212179	NM_000861	HRH1	Histamine receptor H1	-2.6326	8.6324e-14
A_32_P218883	NM_018339	RFK	Homo sapiens riboflavin kinase (RFK), mRNA [NM_018339]	-2.6334	0
A_24_P236091	NM_001975	ENO2	Homo sapiens enolase 2 (gamma, neuronal) (ENO2), mRNA [NM_001975]	-2.6343	2.997e-07
A_23_P30363	NM_004199	P4HA2	Homo sapiens procollagen-proline, 2-oxoglutarate 4-dioxygenase (proline 4-hydroxylase), alpha polypeptide II (P4HA2), mRNA [NM_004199]	-2.6351	1.6812e-09
A_24_P351852	NM_032464	WBSCR5	Homo sapiens Williams-Beuren syndrome chromosome region 5 (WBSCR5), transcript variant 4, mRNA [NM_032464]	-2.6376	0
A_23_P138495	NM_006504	PTPRE	Homo sapiens protein tyrosine phosphatase, receptor type, E (PTPRE), transcript variant 1, mRNA [NM_006504]	-2.639	6.5221e-32
A_24_P174793	NM_000439	PCSK1	Homo sapiens proprotein convertase subtilisin [NM_000439]	-2.6412	2.0856e-21
A_23_P67980	NM_003709	KLF7	Homo sapiens Kruppel-like factor 7 (ubiquitous) (KLF7), mRNA [NM_003709]	-2.6423	0
A_23_P110212	NM_001995	ACSL1	Homo sapiens acyl-CoA synthetase long-chain family member 1 (ACSL1), mRNA [NM_001995]	-2.6458	0
A_23_P101374	NM_030622	CYP2S1	Homo sapiens cytochrome P450, family 2, subfamily S, polypeptide 1 (CYP2S1), mRNA [NM_030622]	-2.6466	6.3828e-36
A_23_P204998	NM_005766	FARP1	Homo sapiens FERM, RhoGEF (ARHGEF) and pleckstrin domain protein 1 (chondrocyte-derived) (FARP1), transcript variant 1, mRNA [NM_005766]	-2.6505	0
A_23_P83098	NM_000689	ALDH1A1	Homo sapiens aldehyde dehydrogenase 1 family, member A1 (ALDH1A1), mRNA [NM_000689]	-2.6507	1.4459e-36
A_23_P90710	NM_001927	DES	Homo sapiens desmin (DES), mRNA [NM_001927]	-2.6517	4.7396e-07
A_24_P229536	NM_001005733	C21orf34	Chromosome 21 open reading frame 34	-2.6519	2.9503e-36
A_24_P210420	NM_178006	STARD13	Homo sapiens START domain containing 13 (STARD13), transcript variant alpha, mRNA [NM_178006]	-2.6553	8.1986e-07
A_23_P48217	NM_030817	APOLD1	hypothetical protein DKFZp434F0318	-2.6587	3.4675e-07
A_24_P331128	NM_002068	GNA15	Homo sapiens guanine nucleotide binding protein (G protein), alpha 15 (Gq class) (GNA15), mRNA [NM_002068]	-2.6602	1.864e-38
A_23_P58706	BC128163	BC128163	Homo sapiens serine protease inhibitor, mRNA (cDNA clone MGC:149259 IMAGE:40113027), complete cds. [BC128163]	-2.6606	0.0001
A_24_P255415	ENST00000316772	ENST00000316772	Homo sapiens HSPC102 mRNA, partial cds. [AF161365]	-2.6614	0.0004
A_23_P216361	NM_021110	COL14A1	Collagen, type XIV, alpha 1 (undulin)	-2.6655	4.8956e-06
A_32_P185766	BX103476	BX103476	Transcribed locus	-2.6671	0.0006
A_23_P250800	NM_006100	SIAT10	Homo sapiens sialyltransferase 10 (alpha-2,3-sialyltransferase VI) (SIAT10), mRNA [NM_006100]	-2.6673	6.5961e-21
A_32_P122226	NM_152435	MGC35366	Homo sapiens hypothetical protein MGC35366 (MGC35366), mRNA [NM_152435]	-2.668	8.7543e-14
A_23_P329452	ENST00000366906	ENST00000366906	1-acyl-sn-glycerol-3-phosphate acyltransferase delta (EC 2.3.1.51) (1- AGP acyltransferase 4) (1-AGPAT 4) (Lysophosphatidic acid acyltransferase delta) (LPAAT-delta) (1-acylglycerol-3-phosphate O- acyltransferase 4)....	-2.6703	2.3566e-38
A_32_P133926	A_32_P133926	A_32_P133926	Unknown	-2.6709	0
A_23_P59022	NM_033502	TRERF1	transcriptional regulating protein 132	-2.6718	1.9872e-07
A_23_P415401	NM_001206	KLF9	Homo sapiens basic transcription element binding protein 1 (BTEB1), mRNA [NM_001206]	-2.6805	5.6314e-35
A_23_P116414	NM_007069	HRASLS3	Homo sapiens HRAS-like suppressor 3 (HRASLS3), mRNA [NM_007069]	-2.6829	8.6546e-28
A_24_P295999	NM_000616	CD4	Homo sapiens CD4 antigen (p55) (CD4), mRNA [NM_000616]	-2.6851	0
A_24_P385024	BC031359	BC031359	Homo sapiens, clone IMAGE:4778855	-2.6862	6.9451e-41
A_32_P129945	AK096065	LOC442285	Hypothetical LOC442285	-2.6926	5.4106e-05
A_32_P58029	A_32_P58029	A_32_P58029	Unknown	-2.6937	3.0529e-15
A_24_P354800	NM_002119	HLA-DOA	Homo sapiens major histocompatibility complex, class II, DO alpha (HLA-DOA), mRNA [NM_002119]	-2.6957	4.2039e-45
A_32_P208403	NM_053064	GNG2	Guanine nucleotide binding protein (G protein), gamma 2	-2.6985	9.3538e-26
A_23_P502336	NM_013447	EMR2	Egf-like module containing, mucin-like, hormone receptor-like 2	-2.7019	0.0005
A_23_P217564	NM_004458	FACL4	Acyl-CoA synthetase long-chain family member 4	-2.707	0
A_32_P221590	THC2643233	THC2643233	Q3VNU0_9CHLB (Q3VNU0) DNA/RNA non-specific endonuclease precursor, partial (5%) [THC2643233]	-2.7074	0
A_23_P34710	ENST00000357180	EGLN1	Egl nine homolog 1 (EC 1.14.11.-) (Hypoxia-inducible factor prolyl hydroxylase 2) (HIF-prolyl hydroxylase 2) (HIF-PH2) (HPH-2) (Prolyl hydroxylase domain-containing protein 2) (PHD2) (SM-20). [Source:Uniprot/SWISSPROT;Acc:Q9GZT9] [ENST00000357180]	-2.708	0
A_23_P49376	NM_000078	CETP	Homo sapiens cholesteryl ester transfer protein, plasma (CETP), mRNA [NM_000078]	-2.7096	0
A_23_P129856	BY798288	BY798288	Transcribed locus	-2.7117	2.6814e-09
A_24_P925678	A_24_P925678	A_24_P925678	Unknown	-2.7184	6.1894e-05
A_23_P8981	NM_000349	STAR	Steroidogenic acute regulator	-2.722	0
A_23_P33420	NM_030956	TLR10	Homo sapiens toll-like receptor 10 (TLR10), mRNA [NM_030956]	-2.7236	0.0006
A_32_P131870	A_32_P131870	A_32_P131870	Unknown	-2.7253	2.0847e-41
A_23_P26771	NM_006678	CMRF35	Homo sapiens CMRF35 leukocyte immunoglobulin-like receptor (CMRF35), mRNA [NM_006678]	-2.726	3.369e-39
A_23_P54488	NM_015162	BG1	Homo sapiens lipidosin (BG1), mRNA [NM_015162]	-2.7261	2.0599e-11
A_23_P258483	NM_024669	FLJ11795	Homo sapiens hypothetical protein FLJ11795 (FLJ11795), mRNA [NM_024669]	-2.7385	1.6669e-19
A_23_P105409	NM_006301	MAP3K12	Homo sapiens mitogen-activated protein kinase kinase kinase 12 (MAP3K12), mRNA [NM_006301]	-2.7422	2.7331e-07
A_24_P339858	ENST00000330490	ENST00000330490	CU090_HUMAN Isoform 2 of P59090 - Homo sapiens (Human) [Source:Uniprot/Varsplic;Acc:P59090-2] [ENST00000330490]	-2.7426	1.69e-32
A_24_P917123	NM_013262	MYLIP	Homo sapiens myosin regulatory light chain interacting protein (MYLIP), mRNA [NM_013262]	-2.7449	0
A_23_P83838	NM_004056	CA8	Homo sapiens carbonic anhydrase VIII (CA8), mRNA [NM_004056]	-2.7471	7.5566e-15
A_23_P202219	NM_015916	FAM26B	Homo sapiens family with sequence similarity 26, member B (FAM26B), mRNA [NM_015916]	-2.7472	0
A_24_P861099	AK094718	FLJ22536	Hypothetical locus LOC401237	-2.7487	1.4077e-06
A_23_P398854	NM_173660	FLJ33718	Homo sapiens hypothetical protein FLJ33718 (FLJ33718), mRNA [NM_173660]	-2.7489	2.2183e-20
A_23_P105963	NM_152327	AK7	Homo sapiens adenylate kinase 7 (AK7), mRNA [NM_152327]	-2.754	2.9558e-07
A_23_P124108	NM_000632	ITGAM	Homo sapiens integrin, alpha M (complement component receptor 3, alpha; also known as CD11b (p170), macrophage antigen alpha polypeptide) (ITGAM), mRNA [NM_000632]	-2.756	2.7556e-22
A_32_P130522	THC2655527	THC2655527	Unknown	-2.7593	1.0147e-16
A_32_P135767	A_32_P135767	A_32_P135767	Unknown	-2.7602	3.0629e-16
A_23_P24077	NM_022153	C10orf54	PP2135 protein	-2.7617	1.1688e-17
A_23_P434398	NM_153235	TXLNB	Taxilin beta	-2.7617	5.1011e-07
A_23_P348524	NM_001007125	LOC198437	BA299N6.3	-2.7619	6.0575e-05
A_32_P56001	NM_012072	C1QR1	Homo sapiens complement component 1, q subcomponent, receptor 1 (C1QR1), mRNA [NM_012072]	-2.7627	1.8601e-31
A_24_P415208	BC060806	RECK	Reversion-inducing-cysteine-rich protein with kazal motifs	-2.7685	0.0001
A_23_P251412	NM_006998	SCGN	Homo sapiens secretagogin, EF-hand calcium binding protein (SCGN), mRNA [NM_006998]	-2.771	3.8909e-38
A_23_P254741	NM_003102	SOD3	Homo sapiens superoxide dismutase 3, extracellular (SOD3), mRNA [NM_003102]	-2.7734	1.0673e-08
A_23_P56328	NM_031310	PLVAP	Homo sapiens plasmalemma vesicle associated protein (PLVAP), mRNA [NM_031310]	-2.7763	4.0183e-07
A_24_P930727	AK091677	AK091677	CDNA FLJ34358 fis, clone FEBRA2013905	-2.7811	0.0004
A_23_P252388	NM_024867	FLJ23577	Homo sapiens KPL2 protein (FLJ23577), transcript variant 1, mRNA [NM_024867]	-2.7909	0.0004
A_32_P116816	A_32_P116816	A_32_P116816	Unknown	-2.7944	0.0002
A_23_P201538	NM_002228	JUN	Homo sapiens v-jun sarcoma virus 17 oncogene homolog (avian) (JUN), mRNA [NM_002228]	-2.7946	4.9471e-29
A_23_P129786	NM_001005291	SREBF1	Sterol regulatory element binding transcription factor 1	-2.7967	0
A_23_P142878	NM_032827	ATOH8	Homo sapiens atonal homolog 8 (Drosophila) (ATOH8), mRNA [NM_032827]	-2.798	3.9765e-05
A_23_P431776	NM_001079675	ETV4	Homo sapiens ets variant gene 4 (E1A enhancer binding protein, E1AF) (ETV4), transcript variant 2, mRNA [NM_001079675]	-2.8006	1.6934e-08
A_23_P67339	NM_020650	RCN3	Homo sapiens reticulocalbin 3, EF-hand calcium binding domain (RCN3), mRNA [NM_020650]	-2.8047	1.2737e-06
A_23_P150064	NM_024756	MMRN2	Homo sapiens multimerin 2 (MMRN2), mRNA [NM_024756]	-2.8067	4.2139e-29
A_23_P300150	NM_172387	NFATC1	Nuclear factor of activated T-cells, cytoplasmic, calcineurin-dependent 1	-2.8107	1.0874e-26
A_23_P132515	NM_017699	SIDT1	Homo sapiens SID1 transmembrane family, member 1 (SIDT1), mRNA [NM_017699]	-2.8124	1.6572e-19
A_23_P46131	NM_024869	FLJ14050	Homo sapiens hypothetical protein FLJ14050 (FLJ14050), mRNA [NM_024869]	-2.8214	3.9833e-33
A_23_P131846	NM_005985	SNAI1	Homo sapiens snail homolog 1 (Drosophila) (SNAI1), mRNA [NM_005985]	-2.8331	0
A_24_P184555	NM_002859	PXN	Homo sapiens paxillin (PXN), mRNA [NM_002859]	-2.8334	2.2548e-41
A_23_P21758	NM_014265	ADAM28	Homo sapiens a disintegrin and metalloproteinase domain 28 (ADAM28), transcript variant 1, mRNA [NM_014265]	-2.8381	3.631e-11
A_23_P4649	NM_001645	APOC1	Homo sapiens apolipoprotein C-I (APOC1), mRNA [NM_001645]	-2.8381	1.0425e-16
A_23_P326963	NM_178496	LOC151963	Homo sapiens similar to BcDNA:GH11415 gene product (LOC151963), mRNA [NM_178496]	-2.8399	4.8627e-11
A_23_P420831	NM_052828	TRIM10	Tripartite motif-containing 10	-2.8445	0
A_23_P206585	NM_002738	PRKCB1	Protein kinase C, beta 1	-2.8462	0.0005
A_23_P130333	NM_000371	TTR	Homo sapiens transthyretin (prealbumin, amyloidosis type I) (TTR), mRNA [NM_000371]	-2.8466	0.0009
A_24_P201064	AK091994	LOC286044	Hypothetical protein LOC286044	-2.849	9.6373e-29
A_23_P13382	NM_001013254	LSP1	Lymphocyte-specific protein 1	-2.8503	2.1293e-10
A_24_P329487	NM_174911	NSE2	Homo sapiens breast cancer membrane protein 101 (NSE2), mRNA [NM_174911]	-2.8527	0
A_24_P925505	S67044	CD36	CD36=collagen type I/thrombospondin receptor {one exon} [human, mRNA Partial, 369 nt].	-2.8529	7.5543e-16
A_24_P333857	NM_032291	DKFZp761D221	Homo sapiens hypothetical protein DKFZp761D221 (DKFZp761D221), mRNA [NM_032291]	-2.8532	4.2309e-31
A_24_P115990	NM_020547	AMHR2	Homo sapiens anti-Mullerian hormone receptor, type II (AMHR2), mRNA [NM_020547]	-2.8647	7.092e-17
A_23_P68338	NM_138390	LOC92691	Homo sapiens hypothetical protein BC008604 (LOC92691), mRNA [NM_138390]	-2.8651	7.4625e-06
A_24_P634602	BE542385	BE542385	Transcribed locus, strongly similar to XP_496964.1 PREDICTED: hypothetical protein XP_496964 [Homo sapiens]	-2.8716	1.7547e-22
A_23_P317756	NM_202000	SAH	Acyl-CoA synthetase medium-chain family member 3	-2.8733	0
A_24_P151	NM_003636	KCNAB2	Potassium voltage-gated channel, shaker-related subfamily, beta member 2	-2.8742	3.3852e-24
A_32_P31123	THC2690780	THC2690780	Unknown	-2.8744	2.3453e-40
A_23_P136573	NM_003896	SIAT9	Homo sapiens sialyltransferase 9 (CMP-NeuAc:lactosylceramide alpha-2,3-sialyltransferase; GM3 synthase) (SIAT9), mRNA [NM_003896]	-2.8745	2.5822e-25
A_23_P93772	NM_019102	HOXA5	Homo sapiens homeo box A5 (HOXA5), mRNA [NM_019102]	-2.8749	0
A_23_P98910	NM_006152	LRMP	Homo sapiens lymphoid-restricted membrane protein (LRMP), mRNA [NM_006152]	-2.8779	0
A_24_P130959	NM_032435	KIAA1804	Homo sapiens mixed lineage kinase 4 (KIAA1804), mRNA [NM_032435]	-2.8785	0.0002
A_24_P903049	AL137474	AL137474	MRNA; cDNA DKFZp434E2423 (from clone DKFZp434E2423)	-2.8806	0.0003
A_24_P481997	THC2698892	THC2698892	Unknown	-2.885	9.7889e-12
A_32_P27917	BC009415	KIF26A	DKFZP434N178 protein	-2.8958	6.2515e-13
A_32_P173357	AK095259	AK095259	Homo sapiens cDNA FLJ37940 fis, clone CTONG2007779. [AK095259]	-2.9007	4.9284e-11
A_23_P129291	NM_201631	TGM5	Homo sapiens transglutaminase 5 (TGM5), transcript variant 1, mRNA [NM_201631]	-2.9048	6.7211e-08
A_32_P163858	NM_005063	SCD	Homo sapiens stearoyl-CoA desaturase (delta-9-desaturase) (SCD), mRNA [NM_005063]	-2.9132	7.1385e-13
A_23_P25150	NM_006897	HOXC9	Homo sapiens homeo box C9 (HOXC9), mRNA [NM_006897]	-2.9193	0
A_23_P78092	NM_001003927	EVI2A	Ecotropic viral integration site 2A	-2.9323	0
A_32_P139505	THC2555665	THC2555665	Q9F8M7_CARHY (Q9F8M7) DTDP-glucose 4,6-dehydratase (Fragment), partial (11%) [THC2555665]	-2.9334	2.1878e-08
A_24_P417831	ENST00000310146	ENST00000310146	Uncharacterized protein C18orf30. [Source:Uniprot/SWISSPROT;Acc:Q8N787] [ENST00000310146]	-2.9371	2.6679e-06
A_23_P105571	NM_020244	CHPT1	Homo sapiens choline phosphotransferase 1 (CHPT1), mRNA [NM_020244]	-2.9433	1.4015e-10
A_24_P246573	NM_015209	KIAA1026	KIAA1026 protein	-2.9444	6.5639e-07
A_23_P354705	NM_003034	SIAT8A	Homo sapiens sialyltransferase 8A (alpha-N-acetylneuraminate: alpha-2,8-sialyltransferase, GD3 synthase) (SIAT8A), mRNA [NM_003034]	-2.9472	0
A_23_P211850	NM_020676	ABHD6	Homo sapiens abhydrolase domain containing 6 (ABHD6), mRNA [NM_020676]	-2.948	4.22e-11
A_23_P43276	NM_032777	GPR124	Homo sapiens G protein-coupled receptor 124 (GPR124), mRNA [NM_032777]	-2.9481	8.7331e-22
A_24_P182929	NM_003471	KCNAB1	Potassium voltage-gated channel, shaker-related subfamily, beta member 1	-2.9508	6.1174e-10
A_23_P112289	NM_003275	TMOD1	Homo sapiens tropomodulin 1 (TMOD1), mRNA [NM_003275]	-2.9552	0
A_23_P62881	NM_032291	DKFZp761D221	Homo sapiens hypothetical protein DKFZp761D221 (DKFZp761D221), mRNA [NM_032291]	-2.9565	4.2347e-25
A_24_P943205	ENST00000313624	EPSTI1	epithelial stromal interaction 1 isoform 2 [Source:RefSeq_peptide;Acc:NP_150280] [ENST00000313624]	-2.9571	4.1329e-09
A_32_P196072	NM_019080	NDFIP2	hypothetical protein KIAA1165	-2.9578	2.479e-30
A_24_P940909	NM_020458	TTC7A	KIAA1140 protein	-2.9585	6.3646e-26
A_23_P128817	NM_004563	PCK2	Phosphoenolpyruvate carboxykinase 2 (mitochondrial)	-2.9616	4.0163e-19
A_32_P125338	NM_207334	FAM43B	Family with sequence similarity 43, member B	-2.9721	3.088e-35
A_23_P50276	NM_031917	ANGPTL6	Homo sapiens angiopoietin-like 6 (ANGPTL6), mRNA [NM_031917]	-2.9807	0
A_23_P30315	NM_033342	TRIM7	Tripartite motif-containing 7	-2.9811	6.1627e-30
A_23_P325155	NM_138939	CD200R1	CD200 receptor 1	-2.9816	6.3634e-20
A_32_P157846	NR_002834	DUSP5P	Homo sapiens dual specificity phosphatase 5 pseudogene (DUSP5P) on chromosome 1.	-2.9824	7.7766e-05
A_32_P335921	NM_031916	ROPN1L	Homo sapiens ropporin 1-like (ROPN1L), mRNA [NM_031916]	-2.9835	0
A_24_P273738	ENST00000256367	TTC9	Tetratricopeptide repeat protein 9 (TPR repeat protein 9) (Fragment). [Source:Uniprot/SWISSPROT;Acc:Q92623] [ENST00000256367]	-2.9876	4.6069e-10
A_23_P154379	NM_003960	NAT8	Homo sapiens N-acetyltransferase 8 (camello like) (NAT8), mRNA [NM_003960]	-2.9882	2.5025e-05
A_23_P111583	NM_001001547	CD36	CD36 molecule (thrombospondin receptor)	-2.989	6.519e-16
A_23_P374695	NM_000459	TEK	Homo sapiens TEK tyrosine kinase, endothelial (venous malformations, multiple cutaneous and mucosal) (TEK), mRNA [NM_000459]	-2.9913	2.0523e-36
A_24_P53976	NM_002065	GLUL	Homo sapiens glutamate-ammonia ligase (glutamine synthase) (GLUL), mRNA [NM_002065]	-2.992	0
A_23_P16496	A_23_P16496	A_23_P16496	Unknown	-2.9956	0.0002
A_32_P38313	AK098534	JMJD2C	gene amplified in squamous cell carcinoma 1	-2.9971	2.9228e-07
A_24_P262688	NM_021706	LAIR1	Leukocyte-associated immunoglobulin-like receptor 1	-2.9988	0
A_23_P59637	NM_014705	DOCK4	Homo sapiens dedicator of cytokinesis 4 (DOCK4), mRNA [NM_014705]	-3.0001	0
A_32_P494169	ENST00000376238	SLC28A3	concentrative Na+-nucleoside cotransporter [Source:RefSeq_peptide;Acc:NP_071410] [ENST00000376238]	-3.0046	0.0001
A_32_P190181	THC2740317	THC2740317	Unknown	-3.0072	4.5777e-11
A_32_P225854	NM_181784	SPRED2	Homo sapiens sprouty-related, EVH1 domain containing 2 (SPRED2), mRNA [NM_181784]	-3.0109	6.7214e-11
A_23_P42746	NM_000265	NCF1	Neutrophil cytosolic factor 1, (chronic granulomatous disease, autosomal 1)	-3.0151	2.1227e-19
A_23_P50591	NM_004823	KCNK6	Homo sapiens potassium channel, subfamily K, member 6 (KCNK6), mRNA [NM_004823]	-3.0179	3.5619e-28
A_23_P158318	NM_004560	ROR2	Homo sapiens receptor tyrosine kinase-like orphan receptor 2 (ROR2), mRNA [NM_004560]	-3.0263	1.9489e-18
A_23_P12044	NM_018022	FLJ10199	Homo sapiens hypothetical protein FLJ10199 (FLJ10199), mRNA [NM_018022]	-3.0285	0
A_24_P216029	AL136790	AL136790	Homo sapiens mRNA; cDNA DKFZp434F1819 (from clone DKFZp434F1819). [AL136790]	-3.0369	1.519e-05
A_23_P35045	NM_001025598	ARHGAP30	Rho GTPase activating protein 30	-3.0382	0
A_23_P370682	NM_138456	MGC20410	Homo sapiens hypothetical protein BC012330 (MGC20410), mRNA [NM_138456]	-3.0399	2.0364e-21
A_23_P85783	NM_006623	PHGDH	Homo sapiens phosphoglycerate dehydrogenase (PHGDH), mRNA [NM_006623]	-3.0467	4.2443e-14
A_23_P27556	NM_001974	EMR1	Homo sapiens egf-like module containing, mucin-like, hormone receptor-like 1 (EMR1), mRNA [NM_001974]	-3.0516	1.2671e-17
A_23_P362228	NM_138479	LOC148898	Hypothetical protein BC007899	-3.054	0
A_23_P162211	NM_018050	MANSC1	Homo sapiens MANSC domain containing 1 (MANSC1), mRNA [NM_018050]	-3.0621	0
A_24_P13831	NM_182854	SLIC1	Selectin ligand interactor cytoplasmic-1	-3.0621	0.0006
A_32_P67143	BC026098	CCDC26	Coiled-coil domain containing 26	-3.0682	1.779e-18
A_24_P289954	NM_001024455	RGAG4	Retrotransposon gag domain containing 4	-3.0719	0.0002
A_23_P53884	NM_005584	MAB21L1	Mab-21-like 1 (C. elegans)	-3.0748	0
A_23_P129556	NM_000418	IL4R	Homo sapiens interleukin 4 receptor (IL4R), transcript variant 1, mRNA [NM_000418]	-3.0753	0
A_32_P780862	NM_001720	BMP8B	Homo sapiens bone morphogenetic protein 8b (osteogenic protein 2) (BMP8B), mRNA [NM_001720]	-3.0841	4.3998e-06
A_23_P129005	BC008219	KIAA1305	KIAA1305 protein	-3.0872	1.5562e-08
A_32_P886243	AK001089	AK001089	CDNA FLJ10227 fis, clone HEMBB1000103	-3.1047	2.2831e-10
A_24_P397043	NM_173216	SIAT1	ST6 beta-galactosamide alpha-2,6-sialyltranferase 1	-3.1079	5.2361e-08
A_23_P406025	NM_015225	KIAA0367	KIAA0367 protein	-3.1161	7.4046e-07
A_32_P180825	BC029107	FMN1	Formin 1	-3.1235	4.0706e-21
A_23_P306941	NM_153615	RGR	Homo sapiens Ral-GDS related protein Rgr (Rgr), mRNA [NM_153615]	-3.1265	2.1059e-18
A_23_P7342	NM_001075	UGT2B10	Homo sapiens UDP glycosyltransferase 2 family, polypeptide B10 (UGT2B10), mRNA [NM_001075]	-3.1333	6.8076e-09
A_23_P366376	NM_003212	TDGF1	Homo sapiens teratocarcinoma-derived growth factor 1 (TDGF1), mRNA [NM_003212]	-3.1396	1.0402e-10
A_23_P404536	NM_005021	ENPP3	Homo sapiens ectonucleotide pyrophosphatase/phosphodiesterase 3 (ENPP3), mRNA [NM_005021]	-3.1505	1.6828e-06
A_23_P211212	NM_030582	COL18A1	Collagen, type XVIII, alpha 1	-3.1539	2.1765e-32
A_23_P113317	NM_017732	ARIH2	hypothetical protein FLJ20262	-3.1552	0
A_23_P25354	NM_002562	P2RX7	Purinergic receptor P2X, ligand-gated ion channel, 7	-3.1558	1.1434e-07
A_24_P626920	NM_005063	SCD	Homo sapiens stearoyl-CoA desaturase (delta-9-desaturase) (SCD), mRNA [NM_005063]	-3.1578	1.8777e-42
A_23_P430902	NM_178832	C10orf83	Homo sapiens chromosome 10 open reading frame 83 (C10orf83), mRNA [NM_178832]	-3.1637	8.6108e-18
A_23_P364487	BC026098	CCDC26	Coiled-coil domain containing 26	-3.1701	5.3879e-11
A_24_P261734	NM_030674	SLC38A1	Homo sapiens solute carrier family 38, member 1 (SLC38A1), mRNA [NM_030674]	-3.1718	1.2508e-17
A_24_P896619	THC2635386	THC2635386	Unknown	-3.1764	6.8351e-12
A_23_P82449	NM_004403	DFNA5	Homo sapiens deafness, autosomal dominant 5 (DFNA5), mRNA [NM_004403]	-3.1784	0
A_24_P870509	AF086261	LOC644192	Hypothetical protein LOC644192	-3.1849	0.001
A_23_P153320	NM_000201	ICAM1	Homo sapiens intercellular adhesion molecule 1 (CD54), human rhinovirus receptor (ICAM1), mRNA [NM_000201]	-3.1872	0
A_23_P110276	BC004397	AFAP	hypothetical protein MGC10981	-3.1882	0
A_23_P345220	NM_014631	SH3MD1	Homo sapiens SH3 multiple domains 1 (SH3MD1), mRNA [NM_014631]	-3.1955	6.6942e-10
A_23_P52727	NM_182964	NAV2	Homo sapiens neuron navigator 2 (NAV2), transcript variant 1, mRNA [NM_182964]	-3.2053	1.8346e-05
A_24_P356830	AK129956	NFIC	Nuclear factor I/C (CCAAT-binding transcription factor)	-3.2083	7.0234e-20
A_23_P2041	NM_032867	FLJ14966	Homo sapiens hypothetical protein FLJ14966 (FLJ14966), mRNA [NM_032867]	-3.2093	1.8444e-08
A_23_P151426	NM_002015	FOXO1A	Homo sapiens forkhead box O1A (rhabdomyosarcoma) (FOXO1A), mRNA [NM_002015]	-3.2162	3.7597e-38
A_23_P256561	NM_006068	TLR6	Homo sapiens toll-like receptor 6 (TLR6), mRNA [NM_006068]	-3.2194	0
A_32_P215847	AI291464	AI291464	CDNA FLJ39164 fis, clone OCBBF2002656	-3.2316	4.2964e-09
A_24_P115932	NM_004778	GPR44	Homo sapiens G protein-coupled receptor 44 (GPR44), mRNA [NM_004778]	-3.2342	0
A_32_P100830	THC2686967	THC2686967	Unknown	-3.2361	3.9919e-28
A_23_P214554	NM_033229	TRIM15	Tripartite motif-containing 15	-3.2454	3.4523e-06
A_23_P345650	NM_015691	KIAA1280	Homo sapiens KIAA1280 protein (KIAA1280), mRNA [NM_015691]	-3.2518	2.3506e-17
A_32_P133767	NM_198521	C12orf42	Chromosome 12 open reading frame 42	-3.2554	1.8812e-11
A_24_P842016	CR749685	CR749685	MRNA; cDNA DKFZp547P074 (from clone DKFZp547P074)	-3.2568	1.4822e-05
A_23_P62227	NM_025159	CXorf21	Homo sapiens chromosome X open reading frame 21 (CXorf21), mRNA [NM_025159]	-3.2677	0
A_23_P7412	NM_001040462	BTNL8	Homo sapiens butyrophilin-like 8 (BTNL8), transcript variant 2, mRNA [NM_001040462]	-3.2709	2.0711e-33
A_24_P390650	ENST00000315707	ENST00000315707	CDNA FLJ34790 fis, clone NT2NE2005323 (C17orf44 protein) (Hypothetical protein C17orf44). [Source:Uniprot/SPTREMBL;Acc:Q8NAT9] [ENST00000315707]	-3.2785	8.1614e-14
A_23_P351148	NM_053282	EAT2	Homo sapiens SH2 domain-containing molecule EAT2 (EAT2), mRNA [NM_053282]	-3.2873	2.0642e-21
A_23_P118266	NM_006885	ATBF1	Homo sapiens AT-binding transcription factor 1 (ATBF1), mRNA [NM_006885]	-3.2886	0
A_23_P116614	NM_001014811	ME3	Malic enzyme 3, NADP(+)-dependent, mitochondrial	-3.296	2.5105e-21
A_32_P200308	CR600271	CR600271	Full-length cDNA clone CS0DJ012YN23 of T cells (Jurkat cell line) Cot 10-normalized of Homo sapiens (human)	-3.2968	5.2007e-06
A_23_P166526	NM_015653	RIBC2	Homo sapiens RIB43A domain with coiled-coils 2 (RIBC2), mRNA [NM_015653]	-3.3096	1.516e-25
A_23_P209135	NM_002287	LAIR1	Homo sapiens leukocyte-associated Ig-like receptor 1 (LAIR1), transcript variant a, mRNA [NM_002287]	-3.3126	0
A_24_P923251	NM_198951	TGM2	Transglutaminase 2 (C polypeptide, protein-glutamine-gamma-glutamyltransferase)	-3.3245	0
A_23_P14774	NM_148979	CTSH	Homo sapiens cathepsin H (CTSH), transcript variant 2, mRNA [NM_148979]	-3.3267	5.4945e-25
A_32_P86763	NM_004613	TGM2	Homo sapiens transglutaminase 2 (C polypeptide, protein-glutamine-gamma-glutamyltransferase) (TGM2), transcript variant 1, mRNA [NM_004613]	-3.3314	2.7885e-15
A_32_P324533	NM_053282	EAT2	Homo sapiens SH2 domain-containing molecule EAT2 (EAT2), mRNA [NM_053282]	-3.332	1.5274e-43
A_23_P3014	NM_005615	RNASE6	Ribonuclease, RNase A family, k6	-3.3381	0
A_23_P91390	NM_000361	THBD	Homo sapiens thrombomodulin (THBD), mRNA [NM_000361]	-3.3426	2.3311e-17
A_23_P76529	NM_000889	ITGB7	Homo sapiens integrin, beta 7 (ITGB7), mRNA [NM_000889]	-3.3455	3.9769e-25
A_23_P411851	NM_152592	C14orf49	Homo sapiens chromosome 14 open reading frame 49 (C14orf49), mRNA [NM_152592]	-3.3478	2.3542e-09
A_23_P76658	NM_052818	CG018	Homo sapiens hypothetical gene CG018 (CG018), mRNA [NM_052818]	-3.3558	0
A_24_P393181	AF150882	SCN12A	Sodium channel, voltage-gated, type XI, alpha	-3.3641	9.3818e-11
A_23_P135061	NM_003389	CORO2A	Coronin, actin binding protein, 2A	-3.369	1.0861e-08
A_23_P14302	BC008299	C14orf139	hypothetical protein FLJ21276	-3.3804	0
A_23_P14508	ENST00000256367	TTC9	Tetratricopeptide repeat protein 9 (TPR repeat protein 9) (Fragment). [Source:Uniprot/SWISSPROT;Acc:Q92623] [ENST00000256367]	-3.3832	8.7763e-12
A_23_P30254	NM_006622	PLK2	Homo sapiens polo-like kinase 2 (Drosophila) (PLK2), mRNA [NM_006622]	-3.3989	2.176e-06
A_23_P70547	NM_005527	HSPA1L	Homo sapiens heat shock 70kDa protein 1-like (HSPA1L), mRNA [NM_005527]	-3.4011	1.0882e-09
A_24_P843020	XM_001129347	LOC729111	PREDICTED: Homo sapiens hypothetical protein LOC729111 (LOC729111), mRNA [XM_001129347]	-3.4061	1.2656e-05
A_32_P99444	THC2664145	THC2664145	Unknown	-3.4221	3.2912e-38
A_24_P932435	NM_001147	ANGPT2	Angiopoietin 2	-3.4252	1.0054e-07
A_23_P128281	NM_007333	KLRC3	Killer cell lectin-like receptor subfamily C, member 3	-3.4274	9.1199e-37
A_24_P109214	NM_001645	APOC1	Homo sapiens apolipoprotein C-I (APOC1), mRNA [NM_001645]	-3.4303	4.8271e-19
A_23_P19894	NM_198098	AQP1	Homo sapiens aquaporin 1 (channel-forming integral protein, 28kDa) (AQP1), transcript variant 1, mRNA [NM_198098]	-3.4359	3.932e-32
A_24_P10657	NM_020428	CTL2	Homo sapiens CTL2 gene (CTL2), mRNA [NM_020428]	-3.4522	1.9473e-12
A_24_P122137	NM_002309	LIF	Homo sapiens leukemia inhibitory factor (cholinergic differentiation factor) (LIF), mRNA [NM_002309]	-3.4612	0
A_23_P117582	NM_130469	JDP2	Homo sapiens jun dimerization protein 2 (JDP2), mRNA [NM_130469]	-3.4631	0
A_23_P139912	NM_002178	IGFBP6	Homo sapiens insulin-like growth factor binding protein 6 (IGFBP6), mRNA [NM_002178]	-3.4641	2.6887e-08
A_24_P315535	NM_181784	SPRED2	Homo sapiens sprouty-related, EVH1 domain containing 2 (SPRED2), mRNA [NM_181784]	-3.4646	6.0098e-06
A_23_P153372	NM_032855	HSH2D	Homo sapiens hematopoietic SH2 domain containing (HSH2D), mRNA [NM_032855]	-3.4691	9.3092e-37
A_23_P414958	NM_005761	PLXNC1	Homo sapiens plexin C1 (PLXNC1), mRNA [NM_005761]	-3.4757	2.7765e-13
A_23_P28507	NM_012214	MGAT4A	Homo sapiens mannosyl (alpha-1,3-)-glycoprotein beta-1,4-N-acetylglucosaminyltransferase, isoenzyme A (MGAT4A), mRNA [NM_012214]	-3.4889	4.9383e-06
A_23_P24843	NM_014632	MICAL2	Homo sapiens flavoprotein oxidoreductase MICAL2 (MICAL2), mRNA [NM_014632]	-3.4901	5.8165e-19
A_23_P421011	NM_030929	KAZALD1	hypothetical protein FKSG28	-3.4903	1.3527e-06
A_24_P783122	AK123722	IL10RB	Interleukin 10 receptor, beta	-3.4908	9.6591e-28
A_24_P291044	AF116616	PRO0998	Homo sapiens PRO0998 mRNA, complete cds.	-3.4939	2.7863e-05
A_32_P91385	THC2622086	THC2622086	HSA277441 xylosyltransferase I {Homo sapiens} (exp=-1; wgp=0; cg=0), partial (8%) [THC2622086]	-3.5008	1.6816e-44
A_23_P414913	NM_022343	C9orf19	Homo sapiens chromosome 9 open reading frame 19 (C9orf19), mRNA [NM_022343]	-3.5181	8.3305e-29
A_23_P139704	NM_001946	DUSP6	Dual specificity phosphatase 6	-3.5195	0
A_23_P141362	NM_001466	FZD2	Frizzled homolog 2 (Drosophila)	-3.5283	5.9211e-06
A_23_P18372	NM_032047	B3GNT5	UDP-GlcNAc:betaGal beta-1,3-N-acetylglucosaminyltransferase 5	-3.5319	1.8381e-10
A_23_P4592	NM_001245	SIGLEC6	Sialic acid binding Ig-like lectin 6	-3.5346	3.4154e-06
A_23_P149121	NM_004675	ARHI	Homo sapiens ras homolog gene family, member I (ARHI), mRNA [NM_004675]	-3.5409	8.3578e-07
A_23_P204630	NM_021229	NTN4	Homo sapiens netrin 4 (NTN4), mRNA [NM_021229]	-3.5429	7.0484e-07
A_24_P505790	NM_001033723	ZNF704	Zinc finger protein 704	-3.5452	8.4419e-10
A_23_P352266	NM_000633	BCL2	Homo sapiens B-cell CLL [NM_000633]	-3.5541	3.4879e-27
A_23_P382584	NM_001819	CHGB	Homo sapiens chromogranin B (secretogranin 1) (CHGB), mRNA [NM_001819]	-3.5603	1.8424e-21
A_23_P56356	NM_153021	PLB1	Phospholipase B1	-3.5681	0
A_23_P503010	NM_153646	SLC24A4	Solute carrier family 24 (sodium/potassium/calcium exchanger), member 4	-3.5844	4.5352e-05
A_23_P135755	NM_001557	IL8RB	Homo sapiens interleukin 8 receptor, beta (IL8RB), mRNA [NM_001557]	-3.5914	2.0936e-10
A_24_P847956	AK001966	LOC284561	Hypothetical protein LOC284561	-3.5939	5.9454e-23
A_32_P222872	A_32_P222872	A_32_P222872	Unknown	-3.6008	7.2012e-13
A_23_P372834	NM_198098	AQP1	Homo sapiens aquaporin 1 (channel-forming integral protein, 28kDa) (AQP1), transcript variant 1, mRNA [NM_198098]	-3.6031	0
A_24_P217904	ENST00000372922	TRERF1	Transcriptional-regulating factor 1 (Transcriptional-regulating protein 132) (Zinc finger transcription factor TReP-132) (Zinc finger protein rapa). [Source:Uniprot/SWISSPROT;Acc:Q96PN7] [ENST00000372922]	-3.6038	7.6475e-14
A_24_P244800	NM_201535	NDRG2	NDRG family member 2	-3.6158	6.4159e-08
A_24_P817236	ENST00000366569	ENST00000366569	Muscarinic acetylcholine receptor M3. [Source:Uniprot/SWISSPROT;Acc:P20309] [ENST00000366569]	-3.6167	2.2955e-10
A_23_P166779	NM_013343	LOH3CR2A	Homo sapiens loss of heterozygosity, 3, chromosomal region 2, gene A (LOH3CR2A), mRNA [NM_013343]	-3.6226	2.0125e-24
A_23_P139198	NM_033101	LGALS12	Homo sapiens lectin, galactoside-binding, soluble, 12 (galectin 12) (LGALS12), mRNA [NM_033101]	-3.6617	3.4364e-28
A_23_P138294	NM_033467	MELL1	Homo sapiens mel transforming oncogene-like 1 (MELL1), mRNA [NM_033467]	-3.6853	0
A_23_P347468	NM_017412	FZD3	Homo sapiens frizzled homolog 3 (Drosophila) (FZD3), mRNA [NM_017412]	-3.6932	0
A_32_P902957	NM_138450	ARL11	Homo sapiens ADP-ribosylation factor-like 11 (ARL11), mRNA [NM_138450]	-3.6941	1.8116e-15
A_23_P34644	NM_004001	FCGR2B	Homo sapiens Fc fragment of IgG, low affinity IIb, receptor for (CD32) (FCGR2B), transcript variant 1, mRNA [NM_004001]	-3.7052	2.1276e-09
A_23_P94533	NM_001912	CTSL	Cathepsin L	-3.707	0
A_24_P379616	NM_153021	PLB1	Phospholipase B1	-3.725	5.6726e-20
A_32_P71585	THC2695815	THC2695815	Unknown	-3.7289	0
A_23_P65678	NM_000138	FBN1	Homo sapiens fibrillin 1 (Marfan syndrome) (FBN1), mRNA [NM_000138]	-3.7371	3.2153e-20
A_23_P368028	AF010315	TP53I11	p53-induced protein	-3.7371	2.3895e-14
A_32_P232198	THC2739684	THC2739684	Unknown	-3.7418	2.0307e-10
A_23_P208302	NM_000483	APOC2	Homo sapiens apolipoprotein C-II (APOC2), mRNA [NM_000483]	-3.7432	1.4013e-45
A_24_P526190	BC034407	LOC643201	Hypothetical protein LOC643200	-3.7492	5.5933e-10
A_24_P822869	AK092681	RCSD1	hypothetical protein MGC21854	-3.75	8.5898e-36
A_23_P85800	NM_001803	CDW52	Homo sapiens CDW52 antigen (CAMPATH-1 antigen) (CDW52), mRNA [NM_001803]	-3.7522	5.8855e-18
A_24_P589266	AK093821	AK093821	CDNA FLJ36502 fis, clone TKIDN1000066	-3.7605	3.0617e-14
A_24_P357936	ENST00000308894	ENST00000308894	Homo sapiens HSPC324 mRNA, partial cds. [AF161442]	-3.7635	5.5274e-13
A_23_P153562	NM_001736	C5R1	Complement component 5a receptor 1	-3.7679	6.5134e-09
A_23_P60079	NM_001147	ANGPT2	Angiopoietin 2	-3.7735	3.8804e-09
A_23_P42588	NM_018384	GIMAP5	Homo sapiens GTPase, IMAP family member 5 (GIMAP5), mRNA [NM_018384]	-3.775	1.9626e-18
A_23_P112452	NR_003191	GGTA1	Homo sapiens glycoprotein, alpha-galactosyltransferase 1 (GGTA1) on chromosome 9 [NR_003191]	-3.783	0
A_23_P9232	NM_001490	GCNT1	Homo sapiens glucosaminyl (N-acetyl) transferase 1, core 2 (beta-1,6-N-acetylglucosaminyltransferase) (GCNT1), mRNA [NM_001490]	-3.7833	1.5304e-32
A_23_P325862	AF116661	PRO1438	hypothetical protein PRO1438	-3.7882	6.7114e-11
A_23_P41217	NM_138806	CD200R1	CD200 receptor 1	-3.7927	6.7504e-18
A_24_P661612	AK097371	PTPRB	Protein tyrosine phosphatase, receptor type, B	-3.7927	5.3854e-08
A_23_P139104	THC2611974	THC2611974	AY250221 nogo receptor-like 3 {Homo sapiens} (exp=-1; wgp=0; cg=0), partial (12%) [THC2611974]	-3.7939	0
A_32_P164503	A_32_P164503	A_32_P164503	Unknown	-3.8027	9.4763e-05
A_23_P201386	NM_012137	DDAH1	Homo sapiens dimethylarginine dimethylaminohydrolase 1 (DDAH1), mRNA [NM_012137]	-3.8273	0
A_23_P389391	NM_005072	SLC12A4	Homo sapiens solute carrier family 12 (potassium [NM_005072]	-3.83	0
A_24_P192727	ENST00000224809	KAZALD1	Kazal-type serine protease inhibitor domain-containing protein 1 precursor. [Source:Uniprot/SWISSPROT;Acc:Q96I82] [ENST00000224809]	-3.8443	3.2797e-32
A_24_P755069	A_24_P755069	A_24_P755069	Unknown	-3.8571	0
A_23_P168847	NM_172366	FBXO16	Homo sapiens F-box protein 16 (FBXO16), mRNA [NM_172366]	-3.8596	1.1384e-20
A_23_P502312	NM_078481	CD97	CD97 molecule	-3.8628	2.2407e-13
A_23_P338919	AK055387	SPEG	Homo sapiens cDNA FLJ30825 fis, clone FEBRA2001706, highly similar to Human APEG-1 mRNA.	-3.8676	7.499e-08
A_32_P95894	THC2770741	THC2770741	Q5AUD6_EMENI (Q5AUD6) Predicted protein, partial (6%) [THC2770741]	-3.869	4.3583e-08
A_32_P153589	THC2679226	THC2679226	Q4T539_TETNG (Q4T539) Chromosome undetermined SCAF9438, whole genome shotgun sequence. (Fragment), partial (4%) [THC2679226]	-3.8738	5.8604e-15
A_32_P80741	NM_001007176	C8orf22	Chromosome 8 open reading frame 22	-3.8786	2.2711e-29
A_23_P161135	NM_002303	LEPR	Homo sapiens leptin receptor (LEPR), transcript variant 1, mRNA [NM_002303]	-3.8817	2.9687e-18
A_23_P69810	NM_032717	MGC11324	Homo sapiens hypothetical protein MGC11324 (MGC11324), mRNA [NM_032717]	-3.8973	4.9608e-22
A_23_P135548	NM_000110	DPYD	Homo sapiens dihydropyrimidine dehydrogenase (DPYD), mRNA [NM_000110]	-3.9003	2.2051e-21
A_32_P211708	ENST00000380239	FZD3	Frizzled-3 precursor (Fz-3) (hFz3). [Source:Uniprot/SWISSPROT;Acc:Q9NPG1] [ENST00000380239]	-3.9057	0
A_23_P250212	ENST00000330777	DKFZp761P0423	Homo sapiens full length insert cDNA YO73E04. [AF075060]	-3.9096	1.4013e-45
A_32_P231250	THC2550720	THC2550720	ALU1_HUMAN (P39188) Alu subfamily J sequence contamination warning entry, partial (30%) [THC2494116]	-3.9101	2.135e-06
A_23_P6771	NM_014583	LMCD1	Homo sapiens LIM and cysteine-rich domains 1 (LMCD1), mRNA [NM_014583]	-3.9476	0
A_23_P208579	THC2517558	THC2517558	BC026690 CD97 antigen, isoform 2 precursor {Homo sapiens} (exp=-1; wgp=0; cg=0), partial (15%) [THC2517558]	-3.9493	8.1564e-08
A_32_P122715	THC2656519	THC2656519	Unknown	-3.9547	1.1734e-22
A_24_P196351	AB208934	PLXNC1	Plexin C1	-3.9613	0
A_24_P298179	A_24_P298179	A_24_P298179	Unknown	-3.9696	3.3188e-25
A_24_P360269	NM_003730	RNASET2	Homo sapiens ribonuclease T2 (RNASET2), mRNA [NM_003730]	-3.9705	4.3693e-36
A_23_P143885	NM_019555	ARHGEF3	Homo sapiens Rho guanine nucleotide exchange factor (GEF) 3 (ARHGEF3), mRNA [NM_019555]	-3.9829	0
A_24_P378202	NM_138450	ARL11	Homo sapiens ADP-ribosylation factor-like 11 (ARL11), mRNA [NM_138450]	-3.9894	5.1224e-31
A_32_P146659	NM_001008745	LOC401431	Hypothetical gene LOC401431	-3.9907	2.0545e-07
A_24_P268676	NM_003670	BHLHB2	Homo sapiens basic helix-loop-helix domain containing, class B, 2 (BHLHB2), mRNA [NM_003670]	-3.9957	0
A_32_P115475	AF086054	AF086054	Homo sapiens full length insert cDNA clone YY82H04. [AF086054]	-4.0037	9.0502e-08
A_23_P218058	NM_013431	KLRC4	Homo sapiens killer cell lectin-like receptor subfamily C, member 4 (KLRC4), mRNA [NM_013431]	-4.0076	0
A_23_P162589	NM_001017535	VDR	Vitamin D (1,25- dihydroxyvitamin D3) receptor	-4.0225	5.4661e-31
A_23_P105227	NM_001014811	ME3	Malic enzyme 3, NADP(+)-dependent, mitochondrial	-4.0292	6.8439e-35
A_23_P253982	NM_002141	HOXA4	Homo sapiens homeo box A4 (HOXA4), mRNA [NM_002141]	-4.0317	1.5901e-33
A_23_P151046	NM_002259	KLRC1	Killer cell lectin-like receptor subfamily C, member 1	-4.035	1.7086e-09
A_24_P231104	NM_001003679	LEPR	Leptin receptor	-4.035	2.2566e-35
A_32_P155030	ENST00000371189	ENST00000371189	Nuclear factor 1 A-type (Nuclear factor 1/A) (NF1-A) (NFI-A) (NF-I/A) (CCAAT-box-binding transcription factor) (CTF) (TGGCA-binding protein). [Source:Uniprot/SWISSPROT;Acc:Q12857] [ENST00000371189]	-4.0493	1.5718e-13
A_32_P190303	NM_198461	LONRF2	LON peptidase N-terminal domain and ring finger 2	-4.0602	1.6716e-07
A_32_P131998	THC2530075	THC2530075	Unknown	-4.0635	1.8158e-13
A_23_P76573	NM_138450	ARL11	Homo sapiens ADP-ribosylation factor-like 11 (ARL11), mRNA [NM_138450]	-4.072	0
A_24_P48204	NM_003004	SECTM1	Homo sapiens secreted and transmembrane 1 (SECTM1), mRNA [NM_003004]	-4.0783	3.9884e-22
A_24_P136453	NM_022648	TNS	Homo sapiens tensin (TNS), mRNA [NM_022648]	-4.0816	1.7684e-11
A_24_P762886	AB007954	KIAA0485	KIAA0485 protein	-4.0827	3.4014e-09
A_32_P224094	U09850	ZNF143	Human zinc finger protein (ZNF143) mRNA, complete cds.	-4.0839	2.7528e-15
A_23_P104798	NM_001562	IL18	Homo sapiens interleukin 18 (interferon-gamma-inducing factor) (IL18), mRNA [NM_001562]	-4.0855	5.4222e-30
A_23_P140207	NM_004563	PCK2	Phosphoenolpyruvate carboxykinase 2 (mitochondrial)	-4.0875	9.7611e-24
A_23_P105794	NM_033255	EPSTI1	Homo sapiens epithelial stromal interaction 1 (breast) (EPSTI1), mRNA [NM_033255]	-4.0904	2.4401e-07
A_32_P95067	ENST00000327299	ENST00000327299	Adenylate kinase isoenzyme 4, mitochondrial (EC 2.7.4.3) (Adenylate kinase 3-like 1) (ATP-AMP transphosphorylase). [Source:Uniprot/SWISSPROT;Acc:P27144] [ENST00000327299]	-4.0958	2.8026e-45
A_24_P37903	THC2603732	THC2603732	Unknown	-4.0988	4.5896e-11
A_23_P75786	NM_016582	SLC15A3	Homo sapiens solute carrier family 15, member 3 (SLC15A3), mRNA [NM_016582]	-4.1042	3.9566e-17
A_23_P15450	NM_018286	TMEM100	hypothetical protein FLJ10970	-4.1043	1.9616e-19
A_24_P546043	AK130099	LOC643424	Hypothetical protein LOC643424	-4.1058	0
A_23_P58266	NM_005980	S100P	Homo sapiens S100 calcium binding protein P (S100P), mRNA [NM_005980]	-4.1215	3.1155e-09
A_23_P34176	NM_015691	KIAA1280	Homo sapiens KIAA1280 protein (KIAA1280), mRNA [NM_015691]	-4.1241	1.4776e-16
A_23_P208182	NM_033130	SIGLEC10	Homo sapiens sialic acid binding Ig-like lectin 10 (SIGLEC10), mRNA [NM_033130]	-4.1298	4.8232e-34
A_32_P178092	BC014113	AFAP	actin filament associated protein	-4.1438	3.0178e-07
A_23_P386964	NM_152543	FLJ25371	Homo sapiens hypothetical protein FLJ25371 (FLJ25371), mRNA [NM_152543]	-4.1511	2.9592e-08
A_23_P63618	NM_005063	SCD	Homo sapiens stearoyl-CoA desaturase (delta-9-desaturase) (SCD), mRNA [NM_005063]	-4.1564	5.7464e-39
A_23_P253661	NM_024902	FLJ13236	Homo sapiens hypothetical protein FLJ13236 (FLJ13236), mRNA [NM_024902]	-4.1673	1.3286e-15
A_24_P264909	NM_019080	NDFIP2	hypothetical protein KIAA1165	-4.173	1.7695e-32
A_23_P416289	NM_001037954	DIXDC1	KIAA1735 protein	-4.1911	1.1508e-12
A_23_P153197	NM_170695	TGIF	TGFB-induced factor (TALE family homeobox)	-4.1961	0
A_23_P217688	NM_004089	DSIPI	TSC22 domain family, member 3	-4.1999	3.6237e-14
A_24_P631848	BC036435	BC036435	CDNA clone IMAGE:4816083	-4.2017	0
A_24_P388528	NM_173216	SIAT1	ST6 beta-galactosamide alpha-2,6-sialyltranferase 1	-4.2084	2.2208e-10
A_24_P10233	NM_014326	DAPK2	Homo sapiens death-associated protein kinase 2 (DAPK2), mRNA [NM_014326]	-4.2139	6.7963e-43
A_24_P886096	ENST00000374851	C9orf125	C9orf125 protein (Fragment). [Source:Uniprot/SPTREMBL;Acc:Q24K26] [ENST00000374851]	-4.2268	0
A_23_P169030	NM_003842	TNFRSF10B	Tumor necrosis factor receptor superfamily, member 10b	-4.2356	3.0157e-17
A_32_P67266	BC045163	BC045163	Homo sapiens, clone IMAGE:4445372, mRNA	-4.242	5.8801e-29
A_23_P200843	ENST00000366569	ENST00000366569	Muscarinic acetylcholine receptor M3. [Source:Uniprot/SWISSPROT;Acc:P20309] [ENST00000366569]	-4.2512	1.9129e-15
A_23_P103601	NM_020379	MAN1C1	Homo sapiens mannosidase, alpha, class 1C, member 1 (MAN1C1), mRNA [NM_020379]	-4.2649	0
A_23_P56050	BC107798	TNNT1	Troponin T type 1 (skeletal, slow)	-4.265	0
A_23_P502350	NM_000635	RFX2	Regulatory factor X, 2 (influences HLA class II expression)	-4.2736	0
A_24_P203000	NM_000878	IL2RB	Homo sapiens interleukin 2 receptor, beta (IL2RB), mRNA [NM_000878]	-4.276	1.3446e-26
A_23_P142055	XM_172995	LOC255809	Hypothetical LOC255809	-4.282	0
A_23_P39465	NM_004335	BST2	Bone marrow stromal cell antigen 2	-4.2915	0
A_24_P102821	NM_000952	PTAFR	Homo sapiens platelet-activating factor receptor (PTAFR), mRNA [NM_000952]	-4.3349	0
A_23_P50175	NM_014385	SIGLEC7	Sialic acid binding Ig-like lectin 7	-4.3402	2.4856e-11
A_23_P54100	NM_001437	ESR2	Homo sapiens estrogen receptor 2 (ER beta) (ESR2), mRNA [NM_001437]	-4.3469	0
A_24_P878376	A_24_P878376	A_24_P878376	Unknown	-4.3572	1.4043e-29
A_23_P8640	NM_001039966	GPR30	Homo sapiens G protein-coupled receptor 30 (GPR30), transcript variant 3, mRNA [NM_001039966]	-4.3906	7.3516e-20
A_23_P370684	NM_145720	TIGD4	Homo sapiens tigger transposable element derived 4 (TIGD4), mRNA [NM_145720]	-4.3937	3.9247e-09
A_23_P413760	NM_175081	P2RX5	Purinergic receptor P2X, ligand-gated ion channel, 5	-4.3965	0
A_23_P433785	NM_002561	P2RX5	Purinergic receptor P2X, ligand-gated ion channel, 5	-4.4009	1.1931e-35
A_23_P326204	NM_152621	MGC26963	Homo sapiens hypothetical protein MGC26963 (MGC26963), mRNA [NM_152621]	-4.4111	4.9362e-07
A_23_P132826	NM_006217	SERPINI2	Homo sapiens serine (or cysteine) proteinase inhibitor, clade I (neuroserpin), member 2 (SERPINI2), mRNA [NM_006217]	-4.426	7.896e-15
A_32_P87191	BC044845	FLJ21408	Hypothetical gene supported by AK025061	-4.4327	7.8332e-13
A_32_P385587	NM_000032	ALAS2	Homo sapiens aminolevulinate, delta-, synthase 2 (sideroblastic/hypochromic anemia) (ALAS2), nuclear gene encoding mitochondrial protein, mRNA [NM_000032]	-4.4493	0
A_24_P136454	NM_022648	TNS	Homo sapiens tensin (TNS), mRNA [NM_022648]	-4.4511	3.6948e-09
A_23_P8452	NM_001040167	LFNG	Homo sapiens LFNG O-fucosylpeptide 3-beta-N-acetylglucosaminyltransferase (LFNG), transcript variant 1, mRNA [NM_001040167]	-4.4745	3.0571e-19
A_23_P22660	NM_006639	CYSLTR1	Homo sapiens cysteinyl leukotriene receptor 1 (CYSLTR1), mRNA [NM_006639]	-4.4785	2.6625e-44
A_23_P33759	NM_004753	DHRS3	Homo sapiens dehydrogenase/reductase (SDR family) member 3 (DHRS3), mRNA [NM_004753]	-4.4821	2.7001e-07
A_24_P365506	NM_017671	C20orf42	Homo sapiens chromosome 20 open reading frame 42 (C20orf42), mRNA [NM_017671]	-4.4868	1.2785e-24
A_24_P85775	NM_001039477	C1orf38	basement membrane-induced gene	-4.5165	0
A_23_P109171	NM_001195	BFSP1	Homo sapiens beaded filament structural protein 1, filensin (BFSP1), mRNA [NM_001195]	-4.5233	0
A_23_P389281	NM_000522	HOXA13	Homo sapiens homeo box A13 (HOXA13), mRNA [NM_000522]	-4.5301	2.139e-18
A_32_P199462	ENST00000341287	LOC389073	Homo sapiens cDNA clone MGC:46742 IMAGE:5730487, complete cds. [BC035737]	-4.5326	2.6599e-33
A_24_P295010	NM_004155	SERPINB9	Homo sapiens serine (or cysteine) proteinase inhibitor, clade B (ovalbumin), member 9 (SERPINB9), mRNA [NM_004155]	-4.5466	1.1231e-17
A_32_P128258	NR_002804	SIGLECP3	Homo sapiens sialic acid binding Ig-like lectin, pseudogene 3 (SIGLECP3) on chromosome 19.	-4.5504	1.4013e-16
A_23_P1473	NM_005041	PRF1	Homo sapiens perforin 1 (pore forming protein) (PRF1), mRNA [NM_005041]	-4.5689	0
A_23_P430120	NM_001430	EPAS1	Homo sapiens endothelial PAS domain protein 1 (EPAS1), mRNA [NM_001430]	-4.5859	1.882e-16
A_32_P154342	NM_180991	SLCO4C1	Homo sapiens solute carrier organic anion transporter family, member 4C1 (SLCO4C1), mRNA [NM_180991]	-4.6073	0
A_24_P159434	NM_007261	CMRF-35H	Homo sapiens leukocyte membrane antigen (CMRF-35H), mRNA [NM_007261]	-4.6117	2.9388e-23
A_23_P45099	NM_002125	HLA-DRB5	Homo sapiens major histocompatibility complex, class II, DR beta 5 (HLA-DRB5), mRNA [NM_002125]	-4.6122	1.0752e-09
A_24_P218265	NM_003842	TNFRSF10B	Tumor necrosis factor receptor superfamily, member 10b	-4.6195	1.3536e-32
A_23_P47322	NM_017589	BTG4	Homo sapiens B-cell translocation gene 4 (BTG4), mRNA [NM_017589]	-4.6334	1.0055e-11
A_23_P127608	NM_019894	TMPRSS4	Transmembrane protease, serine 4	-4.6439	0
A_24_P33982	ENST00000332935	C17orf60	C17orf60 protein (Fragment). [Source:Uniprot/SPTREMBL;Acc:Q7Z6M3] [ENST00000332935]	-4.6469	1.0923e-19
A_24_P930635	THC2616992	THC2616992	Q4SG10_TETNG (Q4SG10) Chromosome 7 SCAF14601, whole genome shotgun sequence, partial (61%) [THC2616992]	-4.66	2.3353e-15
A_23_P88222	NM_138790	C14orf175	Homo sapiens chromosome 14 open reading frame 175 (C14orf175), mRNA [NM_138790]	-4.6633	1.0113e-18
A_23_P500271	NM_002200	IRF5	Homo sapiens interferon regulatory factor 5 (IRF5), transcript variant 1, mRNA [NM_002200]	-4.6762	1.378e-40
A_23_P206806	NM_002209	ITGAL	Homo sapiens integrin, alpha L (antigen CD11A (p180), lymphocyte function-associated antigen 1; alpha polypeptide) (ITGAL), mRNA [NM_002209]	-4.6802	0
A_24_P27513	NM_033401	CNTNAP4	Homo sapiens contactin associated protein-like 4 (CNTNAP4), transcript variant 1, mRNA [NM_033401]	-4.7135	0
A_32_P94667	NM_014644	PDE4DIP	Homo sapiens phosphodiesterase 4D interacting protein (myomegalin) (PDE4DIP), transcript variant 1, mRNA [NM_014644]	-4.7315	2.1822e-09
A_23_P258769	NM_002121	HLA-DPB1	Homo sapiens major histocompatibility complex, class II, DP beta 1 (HLA-DPB1), mRNA [NM_002121]	-4.7401	2.9868e-16
A_32_P15829	AW389914	SIAT1	ST6 beta-galactosamide alpha-2,6-sialyltranferase 1	-4.7467	2.0878e-25
A_32_P3932	THC2692456	THC2692456	Q4RS58_TETNG (Q4RS58) Chromosome 13 SCAF15000, whole genome shotgun sequence, partial (11%) [THC2692456]	-4.747	4.6291e-10
A_24_P289471	NM_003730	RNASET2	Homo sapiens ribonuclease T2 (RNASET2), mRNA [NM_003730]	-4.7482	0
A_23_P122216	NM_002317	LOX	Homo sapiens lysyl oxidase (LOX), mRNA [NM_002317]	-4.7594	2.5865e-22
A_23_P51926	NM_000952	PTAFR	Homo sapiens platelet-activating factor receptor (PTAFR), mRNA [NM_000952]	-4.7622	0
A_23_P873	BC031655	C1orf38	basement membrane-induced gene	-4.7758	0
A_32_P224345	CB852269	GRHL2	hypothetical protein FLJ13782	-4.7832	9.8911e-20
A_23_P121253	NM_003810	TNFSF10	Homo sapiens tumor necrosis factor (ligand) superfamily, member 10 (TNFSF10), mRNA [NM_003810]	-4.785	0
A_24_P461238	AY204747	C21orf24	Chromosome 21 open reading frame 24	-4.7915	2.9884e-14
A_23_P128808	NM_013345	GPR132	Homo sapiens G protein-coupled receptor 132 (GPR132), mRNA [NM_013345]	-4.7929	0
A_23_P52336	NM_170744	UNC5B	Homo sapiens unc-5 homolog B (C. elegans) (UNC5B), mRNA [NM_170744]	-4.8145	3.2752e-36
A_23_P208389	NM_021913	AXL	Homo sapiens AXL receptor tyrosine kinase (AXL), transcript variant 1, mRNA [NM_021913]	-4.8216	0
A_23_P380857	NM_030643	APOL4	Apolipoprotein L, 4	-4.8415	0
A_23_P29257	NM_005318	H1F0	Homo sapiens H1 histone family, member 0 (H1F0), mRNA [NM_005318]	-4.8623	4.169e-35
A_24_P538250	AI359640	AI359640	Transcribed locus, moderately similar to XP_848699.1 PREDICTED: similar to cell division cycle 2-like 1 (PITSLRE proteins) isoform 2 isoform 2 [Canis familiaris]	-4.8673	4.8928e-12
A_24_P15630	NM_198521	C12orf42	Chromosome 12 open reading frame 42	-4.9005	2.5951e-12
A_23_P61255	AK054786	CNTNAP4	Homo sapiens cDNA FLJ30224 fis, clone BRACE2001834.	-4.9007	0
A_23_P152002	NM_004049	BCL2A1	Homo sapiens BCL2-related protein A1 (BCL2A1), mRNA [NM_004049]	-4.9545	4.2096e-15
A_23_P340848	NM_000960	PTGIR	Homo sapiens prostaglandin I2 (prostacyclin) receptor (IP) (PTGIR), mRNA [NM_000960]	-4.9693	0
A_23_P129367	NM_032269	DKFZp434I099	Homo sapiens hypothetical protein DKFZp434I099 (DKFZp434I099), mRNA [NM_032269]	-4.9699	1.0555e-11
A_23_P85682	NM_005595	NFIA	Homo sapiens nuclear factor I/A (NFIA), mRNA [NM_005595]	-4.9817	2.3939e-15
A_23_P136173	NM_172247	CSF2RA	Colony stimulating factor 2 receptor, alpha, low-affinity (granulocyte-macrophage)	-4.9868	0
A_23_P314805	NM_152487	FLJ31842	Homo sapiens hypothetical protein FLJ31842 (FLJ31842), mRNA [NM_152487]	-4.993	2.9494e-09
A_23_P59470	BC038972	ZNF467	Zinc finger protein 467	-5.0005	1.2702e-19
A_24_P51080	AK095719	FLJ42709	Hypothetical gene supported by AK124699	-5.0028	1.7109e-16
A_32_P22654	NM_000032	ALAS2	Homo sapiens aminolevulinate, delta-, synthase 2 (sideroblastic/hypochromic anemia) (ALAS2), nuclear gene encoding mitochondrial protein, mRNA [NM_000032]	-5.0106	0
A_23_P208493	NM_005874	LILRB2	Homo sapiens leukocyte immunoglobulin-like receptor, subfamily B (with TM and ITIM domains), member 2 (LILRB2), mRNA [NM_005874]	-5.0398	3.6249e-14
A_23_P1043	NM_018265	FLJ10901	Homo sapiens hypothetical protein FLJ10901 (FLJ10901), mRNA [NM_018265]	-5.0492	3.0729e-13
A_23_P157283	NM_024315	C7orf23	Homo sapiens chromosome 7 open reading frame 23 (C7orf23), mRNA [NM_024315]	-5.0702	0
A_24_P235429	NM_005502	ABCA1	Homo sapiens ATP-binding cassette, sub-family A (ABC1), member 1 (ABCA1), mRNA [NM_005502]	-5.0743	7.5714e-19
A_32_P194704	BI836739	BI836739	(clone HGP09/HGP32) T cell receptor gamma-2 chain processed pseudogene mRNA, VC region	-5.0761	4.884e-28
A_23_P154849	NM_138983	OLIG1	Oligodendrocyte transcription factor 1	-5.078	4.585e-39
A_32_P155026	ENST00000371189	ENST00000371189	Nuclear factor 1 A-type (Nuclear factor 1/A) (NF1-A) (NFI-A) (NF-I/A) (CCAAT-box-binding transcription factor) (CTF) (TGGCA-binding protein). [Source:Uniprot/SWISSPROT;Acc:Q12857] [ENST00000371189]	-5.1341	1.9474e-15
A_32_P28223	AF074986	LRRC54	hypothetical protein, estradiol-induced	-5.143	1.2642e-16
A_23_P353478	U18259	MHC2TA	Class II, major histocompatibility complex, transactivator	-5.1448	0
A_23_P501985	NM_172249	CSF2RA	Colony stimulating factor 2 receptor, alpha, low-affinity (granulocyte-macrophage)	-5.146	0
A_32_P122492	A_32_P122492	A_32_P122492	Unknown	-5.1546	4.7964e-13
A_32_P73413	A_32_P73413	A_32_P73413	Unknown	-5.1667	2.1914e-14
A_32_P200238	DQ249310	UCA1	UCA1 protein	-5.1953	1.8641e-26
A_23_P200801	NM_001002811	PDE4DIP	Phosphodiesterase 4D interacting protein (myomegalin)	-5.2166	0
A_23_P20743	NM_032342	C9orf125	Homo sapiens chromosome 9 open reading frame 125 (C9orf125), mRNA [NM_032342]	-5.2359	0
A_23_P88278	NM_020366	RPGRIP1	Homo sapiens retinitis pigmentosa GTPase regulator interacting protein 1 (RPGRIP1), mRNA [NM_020366]	-5.2419	1.9904e-33
A_32_P112263	A_32_P112263	A_32_P112263	Unknown	-5.2759	0
A_24_P735072	AK128436	AK128436	Full length insert cDNA clone YY82H04	-5.2975	6.479e-17
A_23_P334414	NM_025228	T3JAM	Homo sapiens TRAF3-interacting Jun N-terminal kinase (JNK)-activating modulator (T3JAM), mRNA [NM_025228]	-5.304	0
A_23_P38167	NM_022036	GPRC5C	Homo sapiens G protein-coupled receptor, family C, group 5, member C (GPRC5C), transcript variant 1, mRNA [NM_022036]	-5.3161	0
A_23_P104318	NM_019058	DDIT4	Homo sapiens DNA-damage-inducible transcript 4 (DDIT4), mRNA [NM_019058]	-5.3316	8.7523e-38
A_23_P362191	ENST00000315707	ENST00000315707	CDNA FLJ34790 fis, clone NT2NE2005323 (C17orf44 protein) (Hypothetical protein C17orf44). [Source:Uniprot/SPTREMBL;Acc:Q8NAT9] [ENST00000315707]	-5.3433	3.9349e-15
A_23_P66694	NM_006495	EVI2B	Ecotropic viral integration site 2B	-5.3457	9.9002e-17
A_23_P50919	NM_006216	SERPINE2	Homo sapiens serine (or cysteine) proteinase inhibitor, clade E (nexin, plasminogen activator inhibitor type 1), member 2 (SERPINE2), mRNA [NM_006216]	-5.3562	0
A_24_P945283	NM_021120	DLG3	Homo sapiens discs, large homolog 3 (neuroendocrine-dlg, Drosophila) (DLG3), mRNA [NM_021120]	-5.3733	3.4376e-08
A_23_P166408	NM_020530	OSM	Homo sapiens oncostatin M (OSM), mRNA [NM_020530]	-5.3829	0
A_24_P112032	NM_031460	KCNK17	Homo sapiens potassium channel, subfamily K, member 17 (KCNK17), mRNA [NM_031460]	-5.3968	0
A_23_P23279	NM_052862	MK2S4	Homo sapiens protein kinase substrate MK2S4 (MK2S4), mRNA [NM_052862]	-5.4015	0
A_24_P119627	BC033999	BC033999	CDNA clone IMAGE:5297975	-5.4086	7.589e-27
A_32_P489986	AK125070	AK125070	Homo sapiens cDNA FLJ43080 fis, clone BRTHA3017047. [AK125070]	-5.425	0
A_32_P118847	BC044619	FLJ42709	Hypothetical gene supported by AK124699	-5.4563	7.6652e-10
A_24_P402222	NM_022555	HLA-DRB3	Homo sapiens major histocompatibility complex, class II, DR beta 3 (HLA-DRB3), mRNA [NM_022555]	-5.4855	0
A_23_P209347	NM_153697	LOC91526	Homo sapiens hypothetical protein DKFZp434D2328 (LOC91526), mRNA [NM_153697]	-5.5096	6.6749e-11
A_24_P13083	NM_130783	LOC90139	Homo sapiens tetraspanin similiar to uroplakin 1 (LOC90139), mRNA [NM_130783]	-5.5199	0
A_23_P104445	NM_152309	PIK3AP1	Homo sapiens phosphoinositide-3-kinase adaptor protein 1 (PIK3AP1), mRNA [NM_152309]	-5.5215	1.4014e-32
A_32_P29083	AK000992	PDE4DIP	Phosphodiesterase 4D interacting protein (myomegalin)	-5.5283	1.0046e-13
A_24_P236956	BC007960	RAB3D	RAB3D, member RAS oncogene family	-5.5863	5.9839e-11
A_23_P41114	NM_005213	CSTA	Homo sapiens cystatin A (stefin A) (CSTA), mRNA [NM_005213]	-5.6701	6.9982e-23
A_23_P323761	NM_025228	T3JAM	Homo sapiens TRAF3-interacting Jun N-terminal kinase (JNK)-activating modulator (T3JAM), mRNA [NM_025228]	-5.6854	0
A_24_P817863	THC2690338	THC2690338	Q9SL08_ARATH (Q9SL08) Expressed protein, partial (5%) [THC2690338]	-5.69	3.1986e-34
A_24_P124558	NM_022658	HOXC8	Homo sapiens homeo box C8 (HOXC8), mRNA [NM_022658]	-5.7247	2.7664e-35
A_23_P93787	NM_001010931	HGF	Hepatocyte growth factor (hepapoietin A; scatter factor)	-5.7449	0
A_23_P42128	NM_031460	KCNK17	Homo sapiens potassium channel, subfamily K, member 17 (KCNK17), mRNA [NM_031460]	-5.7847	0
A_23_P342727	NM_178006	STARD13	Homo sapiens START domain containing 13 (STARD13), transcript variant alpha, mRNA [NM_178006]	-5.8059	2.4511e-12
A_23_P344555	NM_006403	NEDD9	Homo sapiens neural precursor cell expressed, developmentally down-regulated 9 (NEDD9), mRNA [NM_006403]	-5.81	0
A_32_P453321	NM_001004307	MGC33556	Hypothetical LOC339541	-5.8284	0
A_23_P50121	NM_005912	MC4R	Homo sapiens melanocortin 4 receptor (MC4R), mRNA [NM_005912]	-5.8461	5.9575e-30
A_24_P15621	NR_003083	SLC6A10P	Homo sapiens solute carrier family 6 (neurotransmitter transporter, creatine), member 10 (pseudogene) (SLC6A10P) on chromosome 16 [NR_003083]	-5.889	1.6228e-30
A_24_P273742	ENST00000256367	TTC9	Tetratricopeptide repeat protein 9 (TPR repeat protein 9) (Fragment). [Source:Uniprot/SWISSPROT;Acc:Q92623] [ENST00000256367]	-5.8924	2.5508e-13
A_23_P404902	ENST00000378679	ENST00000378679	apical protein 2 [Source:RefSeq_peptide;Acc:NP_597713] [ENST00000378679]	-5.8968	5.2885e-39
A_23_P53390	NM_002837	PTPRB	Homo sapiens protein tyrosine phosphatase, receptor type, B (PTPRB), mRNA [NM_002837]	-5.907	3.3476e-13
A_32_P41604	NM_000130	F5	Homo sapiens coagulation factor V (proaccelerin, labile factor) (F5), mRNA [NM_000130]	-5.9205	1.1149e-18
A_23_P159937	NM_005629	SLC6A8	Solute carrier family 6 (neurotransmitter transporter, creatine), member 8	-5.9257	3.8676e-43
A_24_P40001	NM_014442	SIGLEC8	Homo sapiens sialic acid binding Ig-like lectin 8 (SIGLEC8), mRNA [NM_014442]	-5.943	5.6023e-27
A_32_P93841	THC2628661	THC2628661	ALU7_HUMAN (P39194) Alu subfamily SQ sequence contamination warning entry, partial (13%) [THC2628661]	-5.9488	1.6297e-15
A_23_P30913	NM_033554	HLA-DPA1	Homo sapiens major histocompatibility complex, class II, DP alpha 1 (HLA-DPA1), mRNA [NM_033554]	-5.9936	2.2591e-13
A_23_P207850	NM_032865	CTEN	Homo sapiens C-terminal tensin-like (CTEN), mRNA [NM_032865]	-6.0028	2.7666e-19
A_23_P40856	NM_020678	LRTM1	HT017 protein	-6.0164	6.5721e-43
A_23_P57836	A_23_P57836	A_23_P57836	Unknown	-6.0362	0
A_23_P257834	NM_000477	ALB	Homo sapiens albumin (ALB), mRNA [NM_000477]	-6.0802	1.1278e-31
A_23_P77612	NM_172229	KREMEN2	Homo sapiens kringle containing transmembrane protein 2 (KREMEN2), transcript variant 4, mRNA [NM_172229]	-6.0821	0
A_32_P41173	CR604497	CR604497	Full-length cDNA clone CS0DL009YL13 of B cells (Ramos cell line) Cot 25-normalized of Homo sapiens (human)	-6.0994	0
A_32_P73991	THC2667995	THC2667995	Unknown	-6.1483	1.003e-20
A_23_P66891	NM_012121	CDC42EP4	Homo sapiens CDC42 effector protein (Rho GTPase binding) 4 (CDC42EP4), mRNA [NM_012121]	-6.1834	1.6214e-27
A_23_P201711	NM_014624	S100A6	S100 calcium binding protein A6 (calcyclin)	-6.1943	0
A_24_P365526	NM_002110	HCK	Homo sapiens hemopoietic cell kinase (HCK), mRNA [NM_002110]	-6.205	1.4129e-22
A_24_P174755	NM_003060	SLC22A5	Homo sapiens solute carrier family 22 (organic cation transporter), member 5 (SLC22A5), mRNA [NM_003060]	-6.2165	0
A_32_P229493	BC004287	BC004287	Homo sapiens, clone IMAGE:3618365, mRNA	-6.2271	0
A_24_P385134	NM_001037582	SCD5	hypothetical protein FLJ21032	-6.2448	7.5515e-23
A_32_P44840	AB042555	PDE4DIP	Phosphodiesterase 4D interacting protein (myomegalin)	-6.3314	1.7599e-25
A_32_P164477	AI379175	C9orf19	Chromosome 9 open reading frame 19	-6.3325	1.0542e-14
A_24_P319088	NM_005064	SCYA23	Chemokine (C-C motif) ligand 23	-6.3749	0
A_32_P75141	A_32_P75141	A_32_P75141	Unknown	-6.3816	0
A_23_P83028	NM_021111	RECK	Homo sapiens reversion-inducing-cysteine-rich protein with kazal motifs (RECK), mRNA [NM_021111]	-6.3978	1.7624e-12
A_23_P46618	NM_025179	PLXNA2	Homo sapiens plexin A2 (PLXNA2), mRNA [NM_025179]	-6.4209	1.1352e-36
A_23_P329261	NM_000891	KCNJ2	Homo sapiens potassium inwardly-rectifying channel, subfamily J, member 2 (KCNJ2), mRNA [NM_000891]	-6.4326	0
A_24_P402080	NM_001025100	MBP	Myelin basic protein	-6.459	1.6802e-15
A_23_P55020	NM_139018	CD300LF	CD300 molecule-like family member f	-6.4896	0
A_23_P101683	NM_001828	CLC	Homo sapiens Charcot-Leyden crystal protein (CLC), mRNA [NM_001828]	-6.499	1.2193e-17
A_32_P110550	AB042555	PDE4DIP	Phosphodiesterase 4D interacting protein (myomegalin)	-6.6072	7.7052e-20
A_24_P62505	NM_015101	GLT25D2	Homo sapiens glycosyltransferase 25 domain containing 2 (GLT25D2), mRNA [NM_015101]	-6.6789	4.9709e-27
A_23_P325690	NM_144698	FLJ25124	Homo sapiens hypothetical protein FLJ25124 (FLJ25124), mRNA [NM_144698]	-6.6973	0
A_23_P86012	NM_001017402	LAMB3	Laminin, beta 3	-6.72	0
A_23_P66481	NM_178568	RTN4RL1	Reticulon 4 receptor-like 1	-6.7872	2.56e-11
A_23_P145336	BC106057	HLA-DRB1	Major histocompatibility complex, class II, DR beta 1	-6.8078	5.7461e-24
A_24_P886966	AK123483	AK123483	CDNA FLJ41489 fis, clone BRTHA2004582	-6.9083	3.1102e-28
A_23_P399255	NM_152737	RNF182	Ring finger protein 182	-6.9118	1.9768e-25
A_23_P34915	NM_001040619	ATF3	Homo sapiens activating transcription factor 3 (ATF3), transcript variant 4, mRNA [NM_001040619]	-7.0256	0
A_24_P347378	NM_001629	ALOX5AP	Homo sapiens arachidonate 5-lipoxygenase-activating protein (ALOX5AP), mRNA [NM_001629]	-7.028	0
A_24_P136725	ENST00000374919	ENST00000374919	Spindlin-3 (Spindlin-like protein 3) (SPIN-3). [Source:Uniprot/SWISSPROT;Acc:Q5JUX0] [ENST00000374919]	-7.0675	4.756e-17
A_23_P154919	CR598179	C21orf105	Chromosome 21 open reading frame 105	-7.092	4.8099e-23
A_32_P161762	NM_004348	RUNX2	Homo sapiens runt-related transcription factor 2 (RUNX2), mRNA [NM_004348]	-7.1007	3.6484e-41
A_23_P420692	NM_015053	PPFIA4	Protein tyrosine phosphatase, receptor type, f polypeptide (PTPRF), interacting protein (liprin), alpha 4	-7.1572	7.6357e-18
A_24_P494454	NM_001010862	SPIN3	Spindlin family, member 3	-7.3048	0
A_32_P143000	ENST00000261275	KIAA0574	Homo sapiens mRNA for KIAA0574 protein, partial cds. [AB011146]	-7.3441	0
A_23_P363472	ENST00000377116	ENST00000377116	NEDD4 family-interacting protein 2 (NEDD4 WW domain-binding protein 5A) (Putative MAPK-activating protein PM04/PM05/PM06/PM07) (Putative NF-kappa-B-activating protein 413). [Source:Uniprot/SWISSPROT;Acc:Q9NV92] [ENST00000377116]	-7.522	0
A_24_P929388	NM_138390	LOC92691	Homo sapiens hypothetical protein BC008604 (LOC92691), mRNA [NM_138390]	-7.6175	2.1429e-22
A_24_P633825	A_24_P633825	A_24_P633825	Unknown	-7.7445	9.2621e-11
A_23_P210210	NM_001430	EPAS1	Homo sapiens endothelial PAS domain protein 1 (EPAS1), mRNA [NM_001430]	-7.7561	1.4165e-12
A_32_P112293	ENST00000301896	LOC283129	Homo sapiens cDNA FLJ35811 fis, clone TESTI2006045. [AK093130]	-7.8264	0
A_23_P363316	NM_002147	HOXB5	Homeobox B6	-7.8302	1.7027e-21
A_32_P154091	AK124295	LOC389641	Hypothetical gene supported by AK124295	-7.8488	0
A_23_P111517	NM_022479	WBSCR17	Homo sapiens Williams-Beuren syndrome chromosome region 17 (WBSCR17), mRNA [NM_022479]	-7.9571	1.0343e-26
A_24_P943393	NM_001620	AHNAK	hypothetical protein MGC5395	-8.014	1.8336e-40
A_24_P845223	M27126	HLA-DRB1	Major histocompatibility complex, class II, DR beta 1	-8.0619	1.4013e-45
A_24_P133905	NM_005064	SCYA23	Chemokine (C-C motif) ligand 23	-8.1267	0
A_24_P370472	NM_021983	HLA-DRB4	Major histocompatibility complex, class II, DR beta 1	-8.1766	0
A_24_P319374	NM_005814	GPA33	Homo sapiens glycoprotein A33 (transmembrane) (GPA33), mRNA [NM_005814]	-8.2626	5.3947e-27
A_23_P216455	NM_005059	RLN2	Relaxin 2	-8.3144	0
A_23_P208167	NM_002030	FPRL2	Homo sapiens formyl peptide receptor-like 2 (FPRL2), mRNA [NM_002030]	-8.3259	0
A_23_P22232	NM_002260	KLRC2	Killer cell lectin-like receptor subfamily C, member 2	-8.33	0
A_24_P345290	ENST00000327299	ENST00000327299	Adenylate kinase isoenzyme 4, mitochondrial (EC 2.7.4.3) (Adenylate kinase 3-like 1) (ATP-AMP transphosphorylase). [Source:Uniprot/SWISSPROT;Acc:P27144] [ENST00000327299]	-8.4031	1.1518e-39
A_24_P79617	NM_014656	KIAA0040	Homo sapiens KIAA0040 gene product (KIAA0040), mRNA [NM_014656]	-8.4417	2.9743e-33
A_32_P462766	BC019703	BC019703	Homo sapiens mRNA similar to hypothetical protein FLJ21463 (cDNA clone MGC:24970 IMAGE:4941290), complete cds.	-8.5255	4.8616e-38
A_23_P31006	NM_002125	HLA-DRB5	Homo sapiens major histocompatibility complex, class II, DR beta 5 (HLA-DRB5), mRNA [NM_002125]	-8.5927	0
A_23_P36120	NM_022349	MS4A6A	Membrane-spanning 4-domains, subfamily A, member 6A	-8.6701	0
A_24_P112941	NM_032808	LRRN6A	Homo sapiens leucine rich repeat neuronal 6A (LRRN6A), mRNA [NM_032808]	-8.7235	0
A_24_P362904	NM_004567	PFKFB4	Homo sapiens 6-phosphofructo-2-kinase [NM_004567]	-8.7515	0
A_23_P203173	NM_001558	IL10RA	Homo sapiens interleukin 10 receptor, alpha (IL10RA), mRNA [NM_001558]	-8.7671	1.0986e-30
A_23_P203920	NM_005086	SSPN	Homo sapiens sarcospan (Kras oncogene-associated gene) (SSPN), mRNA [NM_005086]	-8.796	0
A_24_P33895	NM_001040619	ATF3	Homo sapiens activating transcription factor 3 (ATF3), transcript variant 4, mRNA [NM_001040619]	-8.881	0
A_23_P348737	NM_005654	NR2F1	Homo sapiens nuclear receptor subfamily 2, group F, member 1 (NR2F1), mRNA [NM_005654]	-8.9623	9.3011e-13
A_32_P183519	A_32_P183519	A_32_P183519	Unknown	-8.9935	5.9972e-20
A_23_P149153	NM_022359	PDE4DIP	Homo sapiens phosphodiesterase 4D interacting protein (myomegalin) (PDE4DIP), transcript variant 3, mRNA [NM_022359]	-9.0043	4.0408e-40
A_23_P200792	NM_024408	NOTCH2	Homo sapiens Notch homolog 2 (Drosophila) (NOTCH2), mRNA [NM_024408]	-9.0286	5.2046e-37
A_24_P937240	U09197	U09197	5.5 kb mRNA upregulated in retinoic acid treated HL-60 neutrophilic cells	-9.0824	0
A_24_P789425	ENST00000327299	ENST00000327299	Adenylate kinase isoenzyme 4, mitochondrial (EC 2.7.4.3) (Adenylate kinase 3-like 1) (ATP-AMP transphosphorylase). [Source:Uniprot/SWISSPROT;Acc:P27144] [ENST00000327299]	-9.118	0
A_23_P44264	NM_004098	EMX2	Homo sapiens empty spiracles homolog 2 (Drosophila) (EMX2), mRNA [NM_004098]	-9.1477	2.2477e-38
A_23_P164596	NM_053003	SIGLEC12	Homo sapiens sialic acid binding Ig-like lectin 12 (SIGLEC12), transcript variant 1, mRNA [NM_053003]	-9.219	0
A_23_P351724	NM_022648	TNS	Homo sapiens tensin (TNS), mRNA [NM_022648]	-9.2807	0
A_23_P99661	NM_018071	FLJ10357	Homo sapiens hypothetical protein FLJ10357 (FLJ10357), mRNA [NM_018071]	-9.3237	0
A_23_P16722	NM_014689	DOCK10	hypothetical protein FLJ20220	-9.3873	6.2872e-21
A_24_P382187	NM_001552	IGFBP4	Homo sapiens insulin-like growth factor binding protein 4 (IGFBP4), mRNA [NM_001552]	-9.4005	1.4111e-42
A_23_P215883	NM_001040630	NCALD	Homo sapiens neurocalcin delta (NCALD), transcript variant 7, mRNA [NM_001040630]	-9.4864	0
A_24_P278747	NM_001759	CCND2	Homo sapiens cyclin D2 (CCND2), mRNA [NM_001759]	-9.5422	0
A_32_P47410	BX648527	FLJ43080	Hypothetical protein LOC642986	-9.5624	1.5828e-36
A_24_P363609	NM_002200	IRF5	Homo sapiens interferon regulatory factor 5 (IRF5), transcript variant 1, mRNA [NM_002200]	-9.6509	0
A_23_P170233	NM_005213	CSTA	Homo sapiens cystatin A (stefin A) (CSTA), mRNA [NM_005213]	-9.692	8.2968e-35
A_32_P196896	THC2507805	THC2507805	Unknown	-9.9613	0
A_23_P24104	NM_002658	PLAU	Homo sapiens plasminogen activator, urokinase (PLAU), mRNA [NM_002658]	-9.9813	0
A_23_P119502	NM_003775	EDG6	Nicalin homolog (zebrafish)	-9.9847	0
A_24_P187826	CR613874	PPIL4	Peptidylprolyl isomerase (cyclophilin)-like 4	-10.0354	0
A_23_P214222	NM_002356	MARCKS	Homo sapiens myristoylated alanine-rich protein kinase C substrate (MARCKS), mRNA [NM_002356]	-10.2769	0
A_23_P51231	NM_001031680	RUNX3	Runt-related transcription factor 3	-10.3124	0
A_32_P209960	NM_000246	MHC2TA	Homo sapiens MHC class II transactivator (MHC2TA), mRNA [NM_000246]	-10.4587	0
A_23_P2793	NM_001629	ALOX5AP	Homo sapiens arachidonate 5-lipoxygenase-activating protein (ALOX5AP), mRNA [NM_001629]	-10.4951	0
A_23_P105862	NM_023037	13CDNA73	Homo sapiens hypothetical protein CG003 (13CDNA73), mRNA [NM_023037]	-10.6217	0
A_23_P5301	NM_014553	TFCP2L1	Homo sapiens transcription factor CP2-like 1 (TFCP2L1), mRNA [NM_014553]	-10.7562	0
A_24_P37589	NM_001099	ACPP	Homo sapiens acid phosphatase, prostate (ACPP), mRNA [NM_001099]	-10.7927	8.9375e-20
A_23_P119835	NM_021209	CARD12	Homo sapiens caspase recruitment domain family, member 12 (CARD12), mRNA [NM_021209]	-11.0515	0
A_23_P114983	NM_032588	TRIM63	Homo sapiens tripartite motif-containing 63 (TRIM63), mRNA [NM_032588]	-11.0906	3.1052e-33
A_24_P589028	AK026750	AK026750	CDNA: FLJ23097 fis, clone LNG07418	-11.3346	0
A_23_P24903	NM_176072	P2RY2	Homo sapiens purinergic receptor P2Y, G-protein coupled, 2 (P2RY2), transcript variant 1, mRNA [NM_176072]	-11.3382	2.3858e-36
A_23_P406702	NM_203459	KIAA1078	Homo sapiens KIAA1078 protein (KIAA1078), mRNA [NM_203459]	-11.3521	0
A_23_P54968	NM_018414	SIAT7A	Homo sapiens sialyltransferase 7 ((alpha-N-acetylneuraminyl-2,3-beta-galactosyl-1,3)-N-acetyl galactosaminide alpha-2,6-sialyltransferase) A (SIAT7A), mRNA [NM_018414]	-11.3993	2.7853e-18
A_32_P140501	A_32_P140501	A_32_P140501	Unknown	-11.5708	0
A_32_P108655	NM_001005353	AK3	Adenylate kinase 3-like 1	-11.5979	1.4013e-45
A_23_P126075	NM_002245	KCNK1	Homo sapiens potassium channel, subfamily K, member 1 (KCNK1), mRNA [NM_002245]	-11.6106	0
A_23_P167389	NM_022481	CENTD3	Homo sapiens ARF-GAP, RHO-GAP, ankyrin repeat and plekstrin homology domains-containing protein 3 (ARAP3), mRNA [NM_022481]	-11.6385	0
A_23_P200524	NM_001002921	AK3	Adenylate kinase 3-like 1	-11.6684	1.0723e-27
A_23_P255653	NM_003844	TNFRSF10A	Homo sapiens tumor necrosis factor receptor superfamily, member 10a (TNFRSF10A), mRNA [NM_003844]	-11.863	0
A_24_P22050	NM_017817	RAB20	Homo sapiens RAB20, member RAS oncogene family (RAB20), mRNA [NM_017817]	-11.985	0
A_23_P29773	NM_014398	LAMP3	Homo sapiens lysosomal-associated membrane protein 3 (LAMP3), mRNA [NM_014398]	-11.9966	0
A_23_P218002	NM_002728	PRG2	Homo sapiens proteoglycan 2, bone marrow (natural killer cell activator, eosinophil granule major basic protein) (PRG2), mRNA [NM_002728]	-12.1784	0
A_24_P46130	NM_001099	ACPP	Homo sapiens acid phosphatase, prostate (ACPP), mRNA [NM_001099]	-12.2209	0
A_23_P355405	NM_138994	CNTNAP4	KIAA1763 protein	-13.6933	0
A_32_P30004	AF086044	AF086044	Full length insert cDNA clone YX74D05	-13.8793	0
A_23_P109143	NM_000311	PRNP	Prion protein (p27-30) (Creutzfeldt-Jakob disease, Gerstmann-Strausler-Scheinker syndrome, fatal familial insomnia)	-14.396	1.214e-16
A_23_P354146	NM_005546	ITK	Homo sapiens IL2-inducible T-cell kinase (ITK), mRNA [NM_005546]	-14.6146	0
A_24_P279307	NM_139018	CD300LF	CD300 molecule-like family member f	-14.7654	0
A_24_P270235	NM_001759	CCND2	Homo sapiens cyclin D2 (CCND2), mRNA [NM_001759]	-15.0953	2.762e-42
A_23_P426021	NM_015187	KIAA0746	KIAA0746 protein	-15.1168	0
A_23_P21560	NM_030797	FAM49A	Homo sapiens family with sequence similarity 49, member A (FAM49A), mRNA [NM_030797]	-15.1334	0
A_23_P148768	NM_000130	F5	Homo sapiens coagulation factor V (proaccelerin, labile factor) (F5), mRNA [NM_000130]	-15.222	0
A_24_P275073	NM_139155	ADAMTS14	Homo sapiens a disintegrin-like and metalloprotease (reprolysin type) with thrombospondin type 1 motif, 14 (ADAMTS14), transcript variant 1, mRNA [NM_139155]	-15.3715	0
A_23_P69537	NM_006681	NMU	Homo sapiens neuromedin U (NMU), mRNA [NM_006681]	-16.2367	8.1454e-26
A_24_P655243	BC032910	LOC643273	Hypothetical protein LOC643273	-16.3787	0
A_24_P379413	NM_000565	IL6R	Interleukin 6 receptor	-16.5559	0
A_23_P131676	NM_001047841	CXCR7	Homo sapiens chemokine (C-X-C motif) receptor 7 (CXCR7), transcript variant 1, mRNA [NM_001047841]	-16.5997	0
A_24_P251734	NM_020116	FSTL5	Homo sapiens follistatin-like 5 (FSTL5), mRNA [NM_020116]	-16.7064	3.9089e-13
A_23_P203376	NM_152852	MS4A6A	Homo sapiens membrane-spanning 4-domains, subfamily A, member 6A (MS4A6A), transcript variant 1, mRNA [NM_152852]	-16.8939	0
A_24_P364825	THC2623335	THC2623335	Unknown	-17.1236	7.1002e-21
A_23_P131935	NM_017671	C20orf42	Homo sapiens chromosome 20 open reading frame 42 (C20orf42), mRNA [NM_017671]	-17.6852	0
A_23_P136857	A_23_P136857	A_23_P136857	Unknown	-18.6753	0
A_23_P435407	NM_001448	GPC4	Homo sapiens glypican 4 (GPC4), mRNA [NM_001448]	-19.2223	2.0758e-38
A_23_P407565	NM_001337	CX3CR1	Homo sapiens chemokine (C-X3-C motif) receptor 1 (CX3CR1), mRNA [NM_001337]	-20.8375	0
A_24_P367249	A_24_P367249	A_24_P367249	Unknown	-20.8807	0
A_23_P85250	L33930	CD24	CD24 molecule	-22.1781	0
A_32_P87697	NM_019111	HLA-DRA	Major histocompatibility complex, class II, DR alpha	-23.4375	0
A_24_P183128	NM_016619	PLAC8	Homo sapiens placenta-specific 8 (PLAC8), mRNA [NM_016619]	-25.4472	0
A_23_P138194	NM_000433	NCF2	Homo sapiens neutrophil cytosolic factor 2 (65kDa, chronic granulomatous disease, autosomal 2) (NCF2), mRNA [NM_000433]	-26.22	0
A_23_P361584	NM_152680	FLJ32028	Homo sapiens hypothetical protein FLJ32028 (FLJ32028), mRNA [NM_152680]	-29.8006	0
A_23_P139881	NM_001759	CCND2	Homo sapiens cyclin D2 (CCND2), mRNA [NM_001759]	-30.9579	0
A_24_P334378	NM_024743	FLJ21934	Homo sapiens hypothetical protein FLJ21934 (FLJ21934), mRNA [NM_024743]	-33.5034	3.8746e-32
A_23_P81219	NM_016619	PLAC8	Homo sapiens placenta-specific 8 (PLAC8), mRNA [NM_016619]	-42.4051	0
A_23_P40415	NM_007038	ADAMTS5	Homo sapiens a disintegrin-like and metalloprotease (reprolysin type) with thrombospondin type 1 motif, 5 (aggrecanase-2) (ADAMTS5), mRNA [NM_007038]	-42.9811	0
A_23_P130376	NM_022068	FAM38B	Homo sapiens family with sequence similarity 38, member B (FAM38B), mRNA [NM_022068]	-47.2353	0
A_23_P354151	NM_005546	ITK	Homo sapiens IL2-inducible T-cell kinase (ITK), mRNA [NM_005546]	-50.0135	3.8121e-37
