# Supplementary material for: A Unique Role of GATA1s in Down Syndrome Acute Megakaryocytic Leukemia Biology and Therapy
Source: PLoS One. 2011 Nov 16;6(11):e27486. doi: 10.1371/journal.pone.0027486 (PMC3217966; doi:10.1371/journal.pone.0027486)
Supplement: Table S3 — GATA1s responsive probes related to cell differentiation. (XLSX) [file pone.0027486.s004.xlsx]

## Sheet: ontology_query
Table S3. GATA1s responsive probes related to cell differentiation.
Reporter Name	Accession Code	Primary Sequence Name	Sequence Description	Fold Change	P-value
A_23_P139881	NM_001759	CCND2	Homo sapiens cyclin D2 (CCND2), mRNA [NM_001759]	-30.9579	0
A_23_P85250	L33930	CD24	CD24 molecule	-22.1781	0
A_24_P270235	NM_001759	CCND2	Homo sapiens cyclin D2 (CCND2), mRNA [NM_001759]	-15.0953	2.762e-42
A_23_P5301	NM_014553	TFCP2L1	Homo sapiens transcription factor CP2-like 1 (TFCP2L1), mRNA [NM_014553]	-10.7562	0
A_23_P51231	NM_001031680	RUNX3	Runt-related transcription factor 3	-10.3124	0
A_23_P170233	NM_005213	CSTA	Homo sapiens cystatin A (stefin A) (CSTA), mRNA [NM_005213]	-9.692	8.2968e-35
A_24_P278747	NM_001759	CCND2	Homo sapiens cyclin D2 (CCND2), mRNA [NM_001759]	-9.5422	0
A_23_P44264	NM_004098	EMX2	Homo sapiens empty spiracles homolog 2 (Drosophila) (EMX2), mRNA [NM_004098]	-9.1477	2.2477e-38
A_23_P200792	NM_024408	NOTCH2	Homo sapiens Notch homolog 2 (Drosophila) (NOTCH2), mRNA [NM_024408]	-9.0286	5.2046e-37
A_23_P348737	NM_005654	NR2F1	Homo sapiens nuclear receptor subfamily 2, group F, member 1 (NR2F1), mRNA [NM_005654]	-8.9623	9.3011e-13
A_24_P112941	NM_032808	LRRN6A	Homo sapiens leucine rich repeat neuronal 6A (LRRN6A), mRNA [NM_032808]	-8.7235	0
A_23_P363316	NM_002147	HOXB5	Homeobox B6	-7.8302	1.7027e-21
A_23_P210210	NM_001430	EPAS1	Homo sapiens endothelial PAS domain protein 1 (EPAS1), mRNA [NM_001430]	-7.7561	1.4165e-12
A_32_P161762	NM_004348	RUNX2	Homo sapiens runt-related transcription factor 2 (RUNX2), mRNA [NM_004348]	-7.1007	3.6484e-41
A_23_P66481	NM_178568	RTN4RL1	Reticulon 4 receptor-like 1	-6.7872	2.56e-11
A_23_P86012	NM_001017402	LAMB3	Laminin, beta 3	-6.72	0
A_24_P402080	NM_001025100	MBP	Myelin basic protein	-6.459	1.6802e-15
A_23_P201711	NM_014624	S100A6	S100 calcium binding protein A6 (calcyclin)	-6.1943	0
A_23_P93787	NM_001010931	HGF	Hepatocyte growth factor (hepapoietin A; scatter factor)	-5.7449	0
A_24_P124558	NM_022658	HOXC8	Homo sapiens homeo box C8 (HOXC8), mRNA [NM_022658]	-5.7247	2.7664e-35
A_23_P41114	NM_005213	CSTA	Homo sapiens cystatin A (stefin A) (CSTA), mRNA [NM_005213]	-5.6701	6.9982e-23
A_23_P50919	NM_006216	SERPINE2	Homo sapiens serine (or cysteine) proteinase inhibitor, clade E (nexin, plasminogen activator inhibitor type 1), member 2 (SERPINE2), mRNA [NM_006216]	-5.3562	0
A_23_P88278	NM_020366	RPGRIP1	Homo sapiens retinitis pigmentosa GTPase regulator interacting protein 1 (RPGRIP1), mRNA [NM_020366]	-5.2419	1.9904e-33
A_23_P154849	NM_138983	OLIG1	Oligodendrocyte transcription factor 1	-5.078	4.585e-39
A_32_P22654	NM_000032	ALAS2	Homo sapiens aminolevulinate, delta-, synthase 2 (sideroblastic/hypochromic anemia) (ALAS2), nuclear gene encoding mitochondrial protein, mRNA [NM_000032]	-5.0106	0
A_23_P52336	NM_170744	UNC5B	Homo sapiens unc-5 homolog B (C. elegans) (UNC5B), mRNA [NM_170744]	-4.8145	3.2752e-36
A_23_P47322	NM_017589	BTG4	Homo sapiens B-cell translocation gene 4 (BTG4), mRNA [NM_017589]	-4.6334	1.0055e-11
A_32_P154342	NM_180991	SLCO4C1	Homo sapiens solute carrier organic anion transporter family, member 4C1 (SLCO4C1), mRNA [NM_180991]	-4.6073	0
A_23_P430120	NM_001430	EPAS1	Homo sapiens endothelial PAS domain protein 1 (EPAS1), mRNA [NM_001430]	-4.5859	1.882e-16
A_32_P385587	NM_000032	ALAS2	Homo sapiens aminolevulinate, delta-, synthase 2 (sideroblastic/hypochromic anemia) (ALAS2), nuclear gene encoding mitochondrial protein, mRNA [NM_000032]	-4.4493	0
A_23_P54100	NM_001437	ESR2	Homo sapiens estrogen receptor 2 (ER beta) (ESR2), mRNA [NM_001437]	-4.3469	0
A_23_P153197	NM_170695	TGIF	TGFB-induced factor (TALE family homeobox)	-4.1961	0
A_23_P338919	AK055387	SPEG	Homo sapiens cDNA FLJ30825 fis, clone FEBRA2001706, highly similar to Human APEG-1 mRNA.	-3.8676	7.499e-08
A_24_P192727	ENST00000224809	KAZALD1	Kazal-type serine protease inhibitor domain-containing protein 1 precursor. [Source:Uniprot/SWISSPROT;Acc:Q96I82] [ENST00000224809]	-3.8443	3.2797e-32
A_23_P42588	NM_018384	GIMAP5	Homo sapiens GTPase, IMAP family member 5 (GIMAP5), mRNA [NM_018384]	-3.775	1.9626e-18
A_23_P60079	NM_001147	ANGPT2	Angiopoietin 2	-3.7735	3.8804e-09
A_24_P244800	NM_201535	NDRG2	NDRG family member 2	-3.6158	6.4159e-08
A_23_P352266	NM_000633	BCL2	Homo sapiens B-cell CLL [NM_000633]	-3.5541	3.4879e-27
A_23_P204630	NM_021229	NTN4	Homo sapiens netrin 4 (NTN4), mRNA [NM_021229]	-3.5429	7.0484e-07
A_23_P141362	NM_001466	FZD2	Frizzled homolog 2 (Drosophila)	-3.5283	5.9211e-06
A_23_P139704	NM_001946	DUSP6	Dual specificity phosphatase 6	-3.5195	0
A_23_P421011	NM_030929	KAZALD1	hypothetical protein FKSG28	-3.4903	1.3527e-06
A_24_P122137	NM_002309	LIF	Homo sapiens leukemia inhibitory factor (cholinergic differentiation factor) (LIF), mRNA [NM_002309]	-3.4612	0
A_24_P932435	NM_001147	ANGPT2	Angiopoietin 2	-3.4252	1.0054e-07
A_23_P214554	NM_033229	TRIM15	Tripartite motif-containing 15	-3.2454	3.4523e-06
A_23_P2041	NM_032867	FLJ14966	Homo sapiens hypothetical protein FLJ14966 (FLJ14966), mRNA [NM_032867]	-3.2093	1.8444e-08
A_23_P82449	NM_004403	DFNA5	Homo sapiens deafness, autosomal dominant 5 (DFNA5), mRNA [NM_004403]	-3.1784	0
A_23_P211212	NM_030582	COL18A1	Collagen, type XVIII, alpha 1	-3.1539	2.1765e-32
A_23_P366376	NM_003212	TDGF1	Homo sapiens teratocarcinoma-derived growth factor 1 (TDGF1), mRNA [NM_003212]	-3.1396	1.0402e-10
A_32_P780862	NM_001720	BMP8B	Homo sapiens bone morphogenetic protein 8b (osteogenic protein 2) (BMP8B), mRNA [NM_001720]	-3.0841	4.3998e-06
A_23_P85783	NM_006623	PHGDH	Homo sapiens phosphoglycerate dehydrogenase (PHGDH), mRNA [NM_006623]	-3.0467	4.2443e-14
A_23_P158318	NM_004560	ROR2	Homo sapiens receptor tyrosine kinase-like orphan receptor 2 (ROR2), mRNA [NM_004560]	-3.0263	1.9489e-18
A_23_P50276	NM_031917	ANGPTL6	Homo sapiens angiopoietin-like 6 (ANGPTL6), mRNA [NM_031917]	-2.9807	0
A_23_P112289	NM_003275	TMOD1	Homo sapiens tropomodulin 1 (TMOD1), mRNA [NM_003275]	-2.9552	0
A_24_P246573	NM_015209	KIAA1026	KIAA1026 protein	-2.9444	6.5639e-07
A_23_P420831	NM_052828	TRIM10	Tripartite motif-containing 10	-2.8445	0
A_23_P300150	NM_172387	NFATC1	Nuclear factor of activated T-cells, cytoplasmic, calcineurin-dependent 1	-2.8107	1.0874e-26
A_23_P431776	NM_001079675	ETV4	Homo sapiens ets variant gene 4 (E1A enhancer binding protein, E1AF) (ETV4), transcript variant 2, mRNA [NM_001079675]	-2.8006	1.6934e-08
A_23_P142878	NM_032827	ATOH8	Homo sapiens atonal homolog 8 (Drosophila) (ATOH8), mRNA [NM_032827]	-2.798	3.9765e-05
A_23_P201538	NM_002228	JUN	Homo sapiens v-jun sarcoma virus 17 oncogene homolog (avian) (JUN), mRNA [NM_002228]	-2.7946	4.9471e-29
A_23_P8981	NM_000349	STAR	Steroidogenic acute regulator	-2.722	0
A_24_P295999	NM_000616	CD4	Homo sapiens CD4 antigen (p55) (CD4), mRNA [NM_000616]	-2.6851	0
A_23_P48217	NM_030817	APOLD1	hypothetical protein DKFZp434F0318	-2.6587	3.4675e-07
A_23_P67980	NM_003709	KLF7	Homo sapiens Kruppel-like factor 7 (ubiquitous) (KLF7), mRNA [NM_003709]	-2.6423	0
A_24_P174793	NM_000439	PCSK1	Homo sapiens proprotein convertase subtilisin [NM_000439]	-2.6412	2.0856e-21
A_23_P47924	NM_002849	PTPRR	Homo sapiens protein tyrosine phosphatase, receptor type, R (PTPRR), transcript variant 1, mRNA [NM_002849]	-2.6156	9.9994e-16
A_24_P146575	NM_003028	SHB	Homo sapiens SHB (Src homology 2 domain containing) adaptor protein B (SHB), mRNA [NM_003028]	-2.6017	3.508e-08
A_23_P138635	NM_004052	BNIP3	BCL2/adenovirus E1B 19kDa interacting protein 3	-2.5952	0
A_23_P167920	NM_005618	DLL1	Homo sapiens delta-like 1 (Drosophila) (DLL1), mRNA [NM_005618]	-2.5336	1.1305e-05
A_24_P50245	NM_006120	HLA-DMA	Homo sapiens major histocompatibility complex, class II, DM alpha (HLA-DMA), mRNA [NM_006120]	-2.5249	0
A_23_P97700	NM_006472	TXNIP	Homo sapiens thioredoxin interacting protein (TXNIP), mRNA [NM_006472]	-2.5204	0
A_23_P42306	NM_006120	HLA-DMA	Homo sapiens major histocompatibility complex, class II, DM alpha (HLA-DMA), mRNA [NM_006120]	-2.5154	2.7699e-23
A_23_P105251	NM_005269	GLI1	Homo sapiens glioma-associated oncogene homolog (zinc finger protein) (GLI), mRNA [NM_005269]	-2.5058	6.7155e-07
A_23_P94800	NM_002961	S100A4	S100 calcium binding protein A4 (calcium protein, calvasculin, metastasin, murine placental homolog)	-2.467	0
A_23_P128919	NM_002306	LGALS3	Lectin, galactoside-binding, soluble, 3 (galectin 3)	-2.4206	1.2415e-05
A_24_P12401	NM_001025366	VEGF	Vascular endothelial growth factor	-2.3929	0
A_23_P5460	NM_017521	FEV	Homo sapiens FEV (ETS oncogene family) (FEV), mRNA [NM_017521]	-2.3909	1.3483e-10
A_23_P160618	NM_003975	SH2D2A	Homo sapiens SH2 domain protein 2A (SH2D2A), mRNA [NM_003975]	-2.367	4.9488e-22
A_23_P48570	NM_182908	DHRS2	Homo sapiens dehydrogenase/reductase (SDR family) member 2 (DHRS2), transcript variant 1, mRNA [NM_182908]	-2.3202	5.5035e-18
A_23_P138655	NM_057157	CYP26A1	Homo sapiens cytochrome P450, family 26, subfamily A, polypeptide 1 (CYP26A1), transcript variant 2, mRNA [NM_057157]	-2.3089	3.3346e-10
A_24_P407311	NM_014584	ERO1L	Homo sapiens ERO1-like (S. cerevisiae) (ERO1L), mRNA [NM_014584]	-2.3057	0
A_23_P257743	NM_003028	SHB	Homo sapiens SHB (Src homology 2 domain containing) adaptor protein B (SHB), mRNA [NM_003028]	-2.2901	0.0003
A_23_P49338	NM_016639	TNFRSF12A	type I transmembrane protein Fn14	-2.2511	3.8322e-20
A_24_P334640	NM_133367	C6orf33	Homo sapiens chromosome 6 open reading frame 33 (C6orf33), mRNA [NM_133367]	-2.251	1.0241e-10
A_23_P106145	NM_014584	ERO1L	Homo sapiens ERO1-like (S. cerevisiae) (ERO1L), mRNA [NM_014584]	-2.246	1.0774e-12
A_23_P500300	NM_033229	TRIM15	Tripartite motif-containing 15	-2.2235	5.5393e-30
A_23_P37205	NM_201535	NDRG2	NDRG family member 2	-2.1839	8.4613e-24
A_24_P258846	NM_172390	NFATC1	Nuclear factor of activated T-cells, cytoplasmic, calcineurin-dependent 1	-2.1756	1.3658e-16
A_23_P214281	NM_133367	C6orf33	Homo sapiens chromosome 6 open reading frame 33 (C6orf33), mRNA [NM_133367]	-2.1753	9.2916e-16
A_23_P127948	NM_001124	ADM	Homo sapiens adrenomedullin (ADM), mRNA [NM_001124]	-2.1283	1.8559e-21
A_23_P70398	NM_001025370	VEGF	Vascular endothelial growth factor	-2.1068	0
A_23_P213508	NM_000439	PCSK1	Homo sapiens proprotein convertase subtilisin [NM_000439]	-2.1046	7.7477e-13
A_23_P6596	NM_005524	HES1	Homo sapiens hairy and enhancer of split 1, (Drosophila) (HES1), mRNA [NM_005524]	-2.1013	1.7585e-20
A_23_P380939	NM_001720	BMP8B	Homo sapiens bone morphogenetic protein 8b (osteogenic protein 2) (BMP8B), mRNA [NM_001720]	-2.0585	3.385e-05
A_23_P84230	NM_032109	OTP	Homo sapiens orthopedia homolog (Drosophila) (OTP), mRNA [NM_032109]	-2.0381	1.7698e-07
A_23_P155257	NM_032682	FOXP1	Homo sapiens forkhead box P1 (FOXP1), mRNA [NM_032682]	-2.0358	3.4463e-16
A_23_P161507	NM_004923	MTL5	Homo sapiens metallothionein-like 5, testis-specific (tesmin) (MTL5), mRNA [NM_004923]	-2.0212	4.5247e-25
A_23_P55281	NM_004502	HOXB7	Homo sapiens homeo box B7 (HOXB7), mRNA [NM_004502]	-2.0173	8.2144e-21
A_23_P427023	NM_130759	GIMAP1	Homo sapiens GTPase, IMAP family member 1 (GIMAP1), mRNA [NM_130759]	-2.0163	4.1958e-39
A_23_P18123	NM_014932	NLGN1	Homo sapiens neuroligin 1 (NLGN1), mRNA [NM_014932]	2.072	6.1964e-38
A_23_P28595	NM_004405	DLX2	Homo sapiens distal-less homeo box 2 (DLX2), mRNA [NM_004405]	2.0746	0.0002
A_23_P16944	NM_001006946	SDC1	Syndecan 1	2.0825	2.9094e-13
A_23_P335695	AK023854	OBSL1	KIAA0657 protein	2.0876	2.7906e-37
A_23_P212073	NM_207296	MBNL	Muscleblind-like (Drosophila)	2.0916	1.0245e-23
A_23_P163402	NM_000499	CYP1A1	Homo sapiens cytochrome P450, family 1, subfamily A, polypeptide 1 (CYP1A1), mRNA [NM_000499]	2.0918	2.3314e-07
A_23_P417753	NM_002547	OPHN1	Homo sapiens oligophrenin 1 (OPHN1), mRNA [NM_002547]	2.1199	7.0458e-31
A_24_P355944	NM_004093	EFNB2	Homo sapiens ephrin-B2 (EFNB2), mRNA [NM_004093]	2.1449	1.1441e-10
A_23_P110253	NM_000222	KIT	Homo sapiens v-kit Hardy-Zuckerman 4 feline sarcoma viral oncogene homolog (KIT), mRNA [NM_000222]	2.2747	0
A_24_P363278	NM_005906	MAK	Homo sapiens male germ cell-associated kinase (MAK), mRNA [NM_005906]	2.29	2.7279e-06
A_23_P210554	NM_006038	SPATA2	Homo sapiens spermatogenesis associated 2 (SPATA2), mRNA [NM_006038]	2.2926	2.4475e-33
A_23_P209678	NM_002664	PLEK	Homo sapiens pleckstrin (PLEK), mRNA [NM_002664]	2.3152	3.0132e-33
A_23_P123071	NM_001233	CAV2	Caveolin 2	2.3259	1.6566e-19
A_32_P172141	NM_016952	CDON	Homo sapiens cell adhesion molecule-related/down-regulated by oncogenes (CDON), mRNA [NM_016952]	2.327	1.9034e-08
A_23_P104804	NM_006006	ZBTB16	Homo sapiens zinc finger and BTB domain containing 16 (ZBTB16), mRNA [NM_006006]	2.3384	0
A_24_P135322	NM_001024629	NRP1	Neuropilin 1	2.3828	2.2931e-28
A_23_P28598	NM_004405	DLX2	Homo sapiens distal-less homeo box 2 (DLX2), mRNA [NM_004405]	2.3875	0.0002
A_23_P211028	ENST00000284894	NCAM2	Neural cell adhesion molecule 2 precursor (N-CAM 2). [Source:Uniprot/SWISSPROT;Acc:O15394] [ENST00000284894]	2.398	3.4095e-28
A_23_P29499	NM_001904	CTNNB1	Homo sapiens catenin (cadherin-associated protein), beta 1, 88kDa (CTNNB1), mRNA [NM_001904]	2.4023	4.9102e-40
A_23_P36100	NM_170768	ZFP91	Homo sapiens zinc finger protein 91 homolog (mouse) (ZFP91), transcript variant 2, mRNA [NM_170768]	2.4287	4.6327e-10
A_23_P428139	NM_004093	EFNB2	Homo sapiens ephrin-B2 (EFNB2), mRNA [NM_004093]	2.4449	4.74e-27
A_23_P257871	NM_001343	DAB2	Homo sapiens disabled homolog 2, mitogen-responsive phosphoprotein (Drosophila) (DAB2), mRNA [NM_001343]	2.4545	0
A_23_P376488	NM_000594	TNF	Homo sapiens tumor necrosis factor (TNF superfamily, member 2) (TNF), mRNA [NM_000594]	2.4684	1.0681e-06
A_23_P62901	NM_006763	BTG2	Homo sapiens BTG family, member 2 (BTG2), mRNA [NM_006763]	2.4992	3.914e-05
A_23_P123943	NM_004612	TGFBR1	Homo sapiens transforming growth factor, beta receptor I (activin A receptor type II-like kinase, 53kDa) (TGFBR1), mRNA [NM_004612]	2.5426	3.4658e-41
A_23_P404162	NM_014707	HDAC9	histone deacetylase 7B	2.575	6.4537e-08
A_23_P360777	NM_013960	NRG1	Neuregulin 1	2.5916	3.8248e-05
A_24_P102293	NM_015567	SLITRK5	KIAA0918 protein	2.6013	2.1263e-25
A_23_P7313	NM_001040058	SPP1	Homo sapiens secreted phosphoprotein 1 (osteopontin, bone sialoprotein I, early T-lymphocyte activation 1) (SPP1), transcript variant 1, mRNA [NM_001040058]	2.608	1.7196e-12
A_23_P210763	NM_000214	JAG1	Homo sapiens jagged 1 (Alagille syndrome) (JAG1), mRNA [NM_000214]	2.6081	7.976e-20
A_23_P66137	NM_014587	SOX8	SRY (sex determining region Y)-box 8	2.6301	1.6236e-20
A_24_P363408	NM_012259	HEY2	Homo sapiens hairy/enhancer-of-split related with YRPW motif 2 (HEY2), mRNA [NM_012259]	2.6493	0.0002
A_24_P917783	X90978	RUNX1	Runt-related transcription factor 1 (acute myeloid leukemia 1; aml1 oncogene)	2.6808	3.1085e-36
A_23_P44724	NM_001321	CSRP2	Homo sapiens cysteine and glycine-rich protein 2 (CSRP2), mRNA [NM_001321]	2.69	6.851e-09
A_23_P217621	NM_024885	TAF7L	Homo sapiens TAF7-like RNA polymerase II, TATA box binding protein (TBP)-associated factor, 50kDa (TAF7L), mRNA [NM_024885]	2.754	0.0003
A_23_P210176	NM_000210	ITGA6	Homo sapiens integrin, alpha 6 (ITGA6), mRNA [NM_000210]	2.8738	6.0409e-07
A_23_P216023	NM_001146	ANGPT1	Homo sapiens angiopoietin 1 (ANGPT1), transcript variant 1, mRNA [NM_001146]	2.9584	0
A_23_P143143	NM_002166	ID2	Homo sapiens inhibitor of DNA binding 2, dominant negative helix-loop-helix protein (ID2), mRNA [NM_002166]	2.9767	5.2529e-14
A_24_P928052	NM_003873	NRP1	Homo sapiens neuropilin 1 (NRP1), mRNA [NM_003873]	3.0437	1.6816e-43
A_23_P69617	NM_003728	UNC5C	Homo sapiens unc-5 homolog C (C. elegans) (UNC5C), mRNA [NM_003728]	3.2768	0.0001
A_23_P24457	NM_020929	NGL-1	Homo sapiens netrin-G1 ligand (NGL-1), mRNA [NM_020929]	3.3674	0
A_23_P43412	NM_018437	HEMGN	Homo sapiens hemogen (HEMGN), transcript variant 1, mRNA [NM_018437]	3.3961	0
A_24_P34155	ENST00000358356	ENST00000358356	Runt-related transcription factor 1 (Core-binding factor, alpha 2 subunit) (CBF-alpha 2) (Acute myeloid leukemia 1 protein) (Oncogene AML-1) (Polyomavirus enhancer-binding protein 2 alpha B subunit) (PEBP2-alpha B) (PEA2-alpha B) (SL3-3 enhancer...	3.4312	0
A_23_P86390	NM_003873	NRP1	Homo sapiens neuropilin 1 (NRP1), mRNA [NM_003873]	3.5237	1.4158e-15
A_24_P925040	NM_001233	CAV2	Caveolin 2	3.529	1.5094e-18
A_32_P69368	NM_002166	ID2	Homo sapiens inhibitor of DNA binding 2, dominant negative helix-loop-helix protein (ID2), mRNA [NM_002166]	3.5577	6.487e-13
A_23_P140290	NM_021136	RTN1	Homo sapiens reticulon 1 (RTN1), transcript variant 1, mRNA [NM_021136]	3.6672	0
A_23_P30122	NM_000586	IL2	Homo sapiens interleukin 2 (IL2), mRNA [NM_000586]	3.6676	2.3682e-19
A_23_P426663	NM_198159	MITF	Homo sapiens microphthalmia-associated transcription factor (MITF), transcript variant 1, mRNA [NM_198159]	3.7953	4.978e-07
A_23_P317729	NM_152860	SP7	Homo sapiens Sp7 transcription factor (SP7), mRNA [NM_152860]	3.9874	1.7622e-08
A_23_P24870	NM_000610	CD44	CD44 molecule (Indian blood group)	3.9969	2.16e-12
A_23_P212105	NM_001351	DAZL	Homo sapiens deleted in azoospermia-like (DAZL), mRNA [NM_001351]	4.0188	9.7057e-11
A_23_P300033	NM_006206	PDGFRA	Homo sapiens platelet-derived growth factor receptor, alpha polypeptide (PDGFRA), mRNA [NM_006206]	4.0681	3.6729e-05
A_24_P60887	NM_001146	ANGPT1	Homo sapiens angiopoietin 1 (ANGPT1), transcript variant 1, mRNA [NM_001146]	4.0697	0
A_24_P50890	NM_002855	PVRL1	Poliovirus receptor-related 1 (herpesvirus entry mediator C; nectin)	4.1315	0
A_24_P59327	AF280547	NRP1	Neuropilin 1	4.171	9.3474e-08
A_23_P61945	NM_198159	MITF	Homo sapiens microphthalmia-associated transcription factor (MITF), transcript variant 1, mRNA [NM_198159]	4.541	9.3152e-22
A_23_P73345	NM_198159	MITF	Homo sapiens microphthalmia-associated transcription factor (MITF), transcript variant 1, mRNA [NM_198159]	4.7514	1.6777e-11
A_23_P134454	NM_001753	CAV1	Homo sapiens caveolin 1, caveolae protein, 22kDa (CAV1), mRNA [NM_001753]	4.773	0
A_24_P283225	NM_004999	MYO6	Homo sapiens myosin VI (MYO6), mRNA [NM_004999]	4.7805	3.11e-12
A_23_P102364	NM_019850	NGEF	Homo sapiens neuronal guanine nucleotide exchange factor (NGEF), mRNA [NM_019850]	5.2092	0
A_23_P255884	NM_198252	GSN	Homo sapiens gelsolin (amyloidosis, Finnish type) (GSN), transcript variant 2, mRNA [NM_198252]	5.4493	0
A_32_P72067	AK130576	ARHGAP24	hypothetical protein DKFZp564B1162	5.6246	2.0166e-11
A_23_P3651	NM_005332	HBZ	Hemoglobin, zeta	5.657	0
A_24_P645914	ENST00000379748	EFNA5	Ephrin-A5 precursor (EPH-related receptor tyrosine kinase ligand 7) (LERK-7) (AL-1). [Source:Uniprot/SWISSPROT;Acc:P52803] [ENST00000379748]	6.5494	1.5522e-08
A_23_P30115	NM_000586	IL2	Homo sapiens interleukin 2 (IL2), mRNA [NM_000586]	6.6819	2.3843e-17
A_23_P215913	NM_203339	CLU	Clusterin	6.9047	0
A_23_P255952	NM_004999	MYO6	Homo sapiens myosin VI (MYO6), mRNA [NM_004999]	7.0828	2.9687e-14
A_23_P315815	NM_004495	NRG1	Neuregulin 1	7.8481	0
A_23_P25566	NM_004951	EBI2	Epstein-Barr virus induced gene 2 (lymphocyte-specific G protein-coupled receptor)	8.4574	0
A_23_P74575	NM_001766	CD1D	Homo sapiens CD1D antigen, d polypeptide (CD1D), mRNA [NM_001766]	8.979	1.7313e-36
A_23_P136493	NM_013962	NRG1	Homo sapiens neuregulin 1 (NRG1), transcript variant GGF2, mRNA [NM_013962]	9.5191	0
A_23_P216307	NM_004349	CBFA2T1	Runt-related transcription factor 1; translocated to, 1 (cyclin D-related)	12.2805	0
A_23_P210109	NM_019885	CYP26B1	Homo sapiens cytochrome P450, family 26, subfamily B, polypeptide 1 (CYP26B1), mRNA [NM_019885]	12.5244	5.2601e-35
A_23_P431900	BC029406	ANGPT1	Angiopoietin 1	14.0098	0
A_23_P253896	NM_001033047	NPNT	Nephronectin	15.3243	0
