# Supplementary material for: A Unique Role of GATA1s in Down Syndrome Acute Megakaryocytic Leukemia Biology and Therapy
Source: PLoS One. 2011 Nov 16;6(11):e27486. doi: 10.1371/journal.pone.0027486 (PMC3217966; doi:10.1371/journal.pone.0027486)
Supplement: Table S5 — GATA1s responsive probes related to cell death. (XLSX) [file pone.0027486.s006.xlsx]

## Sheet: ontology_query
Table S5. GATA1s responsive probes related to cell death.
Reporter Name	Accession Code	Primary Sequence Name	Sequence Description	Fold Change	P-value
A_23_P85250	L33930	CD24	CD24 molecule	-22.1781	0
A_23_P255653	NM_003844	TNFRSF10A	Homo sapiens tumor necrosis factor receptor superfamily, member 10a (TNFRSF10A), mRNA [NM_003844]	-11.863	0
A_23_P119835	NM_021209	CARD12	Homo sapiens caspase recruitment domain family, member 12 (CARD12), mRNA [NM_021209]	-11.0515	0
A_23_P207850	NM_032865	CTEN	Homo sapiens C-terminal tensin-like (CTEN), mRNA [NM_032865]	-6.0028	2.7666e-19
A_23_P166408	NM_020530	OSM	Homo sapiens oncostatin M (OSM), mRNA [NM_020530]	-5.3829	0
A_23_P104318	NM_019058	DDIT4	Homo sapiens DNA-damage-inducible transcript 4 (DDIT4), mRNA [NM_019058]	-5.3316	8.7523e-38
A_23_P152002	NM_004049	BCL2A1	Homo sapiens BCL2-related protein A1 (BCL2A1), mRNA [NM_004049]	-4.9545	4.2096e-15
A_23_P52336	NM_170744	UNC5B	Homo sapiens unc-5 homolog B (C. elegans) (UNC5B), mRNA [NM_170744]	-4.8145	3.2752e-36
A_23_P121253	NM_003810	TNFSF10	Homo sapiens tumor necrosis factor (ligand) superfamily, member 10 (TNFSF10), mRNA [NM_003810]	-4.785	0
A_24_P218265	NM_003842	TNFRSF10B	Tumor necrosis factor receptor superfamily, member 10b	-4.6195	1.3536e-32
A_23_P1473	NM_005041	PRF1	Homo sapiens perforin 1 (pore forming protein) (PRF1), mRNA [NM_005041]	-4.5689	0
A_23_P169030	NM_003842	TNFRSF10B	Tumor necrosis factor receptor superfamily, member 10b	-4.2356	3.0157e-17
A_24_P10233	NM_014326	DAPK2	Homo sapiens death-associated protein kinase 2 (DAPK2), mRNA [NM_014326]	-4.2139	6.7963e-43
A_23_P217688	NM_004089	DSIPI	TSC22 domain family, member 3	-4.1999	3.6237e-14
A_23_P143885	NM_019555	ARHGEF3	Homo sapiens Rho guanine nucleotide exchange factor (GEF) 3 (ARHGEF3), mRNA [NM_019555]	-3.9829	0
A_23_P139198	NM_033101	LGALS12	Homo sapiens lectin, galactoside-binding, soluble, 12 (galectin 12) (LGALS12), mRNA [NM_033101]	-3.6617	3.4364e-28
A_23_P135755	NM_001557	IL8RB	Homo sapiens interleukin 8 receptor, beta (IL8RB), mRNA [NM_001557]	-3.5914	2.0936e-10
A_23_P352266	NM_000633	BCL2	Homo sapiens B-cell CLL [NM_000633]	-3.5541	3.4879e-27
A_32_P86763	NM_004613	TGM2	Homo sapiens transglutaminase 2 (C polypeptide, protein-glutamine-gamma-glutamyltransferase) (TGM2), transcript variant 1, mRNA [NM_004613]	-3.3314	2.7885e-15
A_24_P923251	NM_198951	TGM2	Transglutaminase 2 (C polypeptide, protein-glutamine-gamma-glutamyltransferase)	-3.3245	0
A_23_P25354	NM_002562	P2RX7	Purinergic receptor P2X, ligand-gated ion channel, 7	-3.1558	1.1434e-07
A_23_P406025	NM_015225	KIAA0367	KIAA0367 protein	-3.1161	7.4046e-07
A_23_P201538	NM_002228	JUN	Homo sapiens v-jun sarcoma virus 17 oncogene homolog (avian) (JUN), mRNA [NM_002228]	-2.7946	4.9471e-29
A_24_P146575	NM_003028	SHB	Homo sapiens SHB (Src homology 2 domain containing) adaptor protein B (SHB), mRNA [NM_003028]	-2.6017	3.508e-08
A_23_P107351	BC051787	NALP1	Homo sapiens NACHT, leucine rich repeat and PYD (pyrin domain) containing 1, mRNA (cDNA clone MGC:57544 IMAGE:5756099), complete cds. [BC051787]	-2.6002	5.6052e-45
A_23_P138635	NM_004052	BNIP3	BCL2/adenovirus E1B 19kDa interacting protein 3	-2.5952	0
A_23_P14559	NM_006871	RIPK3	Homo sapiens receptor-interacting serine-threonine kinase 3 (RIPK3), mRNA [NM_006871]	-2.4802	2.6563e-06
A_23_P30666	NM_014452	TNFRSF21	Homo sapiens tumor necrosis factor receptor superfamily, member 21 (TNFRSF21), mRNA [NM_014452]	-2.3738	4.8674e-11
A_23_P76015	NM_014786	ARHGEF17	Homo sapiens Rho guanine nucleotide exchange factor (GEF) 17 (ARHGEF17), mRNA [NM_014786]	-2.3571	0.0001
A_23_P167509	NM_001037332	CYFIP2	cytoplasmic FMRP interacting protein 2	-2.3341	1.7886e-06
A_23_P79518	NM_000576	IL1B	Homo sapiens interleukin 1, beta (IL1B), mRNA [NM_000576]	-2.3181	1.7439e-18
A_23_P257743	NM_003028	SHB	Homo sapiens SHB (Src homology 2 domain containing) adaptor protein B (SHB), mRNA [NM_003028]	-2.2901	0.0003
A_23_P49338	NM_016639	TNFRSF12A	type I transmembrane protein Fn14	-2.2511	3.8322e-20
A_23_P9932	NM_145341	PDCD4	Homo sapiens programmed cell death 4 (neoplastic transformation inhibitor) (PDCD4), transcript variant 2, mRNA [NM_145341]	-2.1666	1.9372e-30
A_23_P258862	NM_145341	PDCD4	Homo sapiens programmed cell death 4 (neoplastic transformation inhibitor) (PDCD4), transcript variant 2, mRNA [NM_145341]	-2.1601	7.5544e-42
A_24_P294842	NM_000332	ATXN1	Homo sapiens ataxin 1 (ATXN1), mRNA [NM_000332]	-2.1306	1.6278e-05
A_23_P425880	NM_007118	TRIO	Homo sapiens triple functional domain (PTPRF interacting) (TRIO), mRNA [NM_007118]	-2.1183	0
A_23_P72096	NM_000575	IL1A	Homo sapiens interleukin 1, alpha (IL1A), mRNA [NM_000575]	-2.1124	3.0416e-33
A_24_P171268	NM_182663	RASSF5	hypothetical protein MGC10823	-2.0805	6.8287e-17
A_23_P210690	NM_021158	TRIB3	Homo sapiens tribbles homolog 3 (Drosophila) (TRIB3), mRNA [NM_021158]	-2.0475	6.0986e-40
A_23_P201497	NM_182663	RASSF5	hypothetical protein MGC10823	-2.039	4.2182e-21
A_23_P114670	NM_014448	ARHGEF16	Homo sapiens Rho guanine exchange factor (GEF) 16 (ARHGEF16), mRNA [NM_014448]	-2.0384	3.2442e-37
A_23_P78108	NM_005165	ALDOC	Homo sapiens aldolase C, fructose-bisphosphate (ALDOC), mRNA [NM_005165]	-2.0006	6.436e-32
A_24_P393372	AK098354	AK098354	CDNA FLJ25488 fis, clone CBR00232	2.0253	8.102e-28
A_24_P930507	ENST00000377607	ENST00000377607	Ataxin-2 (Spinocerebellar ataxia type 2 protein) (Trinucleotide repeat-containing gene 13 protein). [Source:Uniprot/SWISSPROT;Acc:Q99700] [ENST00000377607]	2.0964	2.7059e-13
A_23_P110253	NM_000222	KIT	Homo sapiens v-kit Hardy-Zuckerman 4 feline sarcoma viral oncogene homolog (KIT), mRNA [NM_000222]	2.2747	0
A_23_P372848	NM_002558	P2RX1	Homo sapiens purinergic receptor P2X, ligand-gated ion channel, 1 (P2RX1), mRNA [NM_002558]	2.3197	1.2353e-17
A_23_P104804	NM_006006	ZBTB16	Homo sapiens zinc finger and BTB domain containing 16 (ZBTB16), mRNA [NM_006006]	2.3384	0
A_23_P29499	NM_001904	CTNNB1	Homo sapiens catenin (cadherin-associated protein), beta 1, 88kDa (CTNNB1), mRNA [NM_001904]	2.4023	4.9102e-40
A_23_P93348	NM_002341	LTB	Lymphotoxin beta (TNF superfamily, member 3)	2.4208	3.294e-08
A_23_P202978	NM_033292	CASP1	Caspase 1, apoptosis-related cysteine peptidase (interleukin 1, beta, convertase)	2.4265	7.985e-11
A_23_P376488	NM_000594	TNF	Homo sapiens tumor necrosis factor (TNF superfamily, member 2) (TNF), mRNA [NM_000594]	2.4684	1.0681e-06
A_23_P422809	NM_005734	HIPK3	Homo sapiens homeodomain interacting protein kinase 3 (HIPK3), mRNA [NM_005734]	2.5174	8.3955e-14
A_23_P88106	AK092739	MCF2L	Homo sapiens cDNA FLJ35420 fis, clone SMINT2001183.	2.5657	8.3897e-20
A_23_P88099	AK092739	MCF2L	Homo sapiens cDNA FLJ35420 fis, clone SMINT2001183.	2.7651	0
A_23_P379649	NM_001003940	BMF	Bcl-2 modifying factor	2.8733	0
A_23_P17837	NM_145343	APOL1	Apolipoprotein L, 1	3.182	1.1729e-06
A_23_P69617	NM_003728	UNC5C	Homo sapiens unc-5 homolog C (C. elegans) (UNC5C), mRNA [NM_003728]	3.2768	0.0001
A_32_P153388	NM_016315	GULP1	Homo sapiens GULP, engulfment adaptor PTB domain containing 1 (GULP1), mRNA [NM_016315]	3.7919	2.2134e-19
A_23_P1461	NM_001008211	OPTN	tumor necrosis factor alpha-inducible cellular protein containing leucine zipper domains; Huntingtin interacting protein L; transcrption factor IIIA-interacting protein	4.4982	4.9876e-10
A_23_P76450	NM_007350	PHLDA1	Homo sapiens pleckstrin homology-like domain, family A, member 1 (PHLDA1), mRNA [NM_007350]	4.7181	9.7273e-05
A_23_P102364	NM_019850	NGEF	Homo sapiens neuronal guanine nucleotide exchange factor (NGEF), mRNA [NM_019850]	5.2092	0
A_23_P255884	NM_198252	GSN	Homo sapiens gelsolin (amyloidosis, Finnish type) (GSN), transcript variant 2, mRNA [NM_198252]	5.4493	0
A_24_P381455	NM_018370	FLJ11259	Homo sapiens hypothetical protein FLJ11259 (FLJ11259), mRNA [NM_018370]	5.542	0
A_23_P216920	NM_014397	NEK6	Homo sapiens NIMA (never in mitosis gene a)-related kinase 6 (NEK6), mRNA [NM_014397]	5.9233	0
A_23_P99163	NM_018370	FLJ11259	Homo sapiens hypothetical protein FLJ11259 (FLJ11259), mRNA [NM_018370]	6.2707	0
A_23_P206212	NM_003246	THBS1	Homo sapiens thrombospondin 1 (THBS1), mRNA [NM_003246]	6.5731	0
A_23_P215913	NM_203339	CLU	Clusterin	6.9047	0
A_24_P157926	NM_006290	TNFAIP3	Homo sapiens tumor necrosis factor, alpha-induced protein 3 (TNFAIP3), mRNA [NM_006290]	6.945	0
A_24_P355816	NM_018370	FLJ11259	Homo sapiens hypothetical protein FLJ11259 (FLJ11259), mRNA [NM_018370]	7.294	0
A_24_P943597	NM_007350	PHLDA1	Homo sapiens pleckstrin homology-like domain, family A, member 1 (PHLDA1), mRNA [NM_007350]	7.6385	4.4186e-19
A_24_P142118	NM_003246	THBS1	Homo sapiens thrombospondin 1 (THBS1), mRNA [NM_003246]	7.7337	0
A_24_P915692	NM_007350	PHLDA1	Homo sapiens pleckstrin homology-like domain, family A, member 1 (PHLDA1), mRNA [NM_007350]	8.5009	2.1318e-37
A_24_P166527	NM_006290	TNFAIP3	Homo sapiens tumor necrosis factor, alpha-induced protein 3 (TNFAIP3), mRNA [NM_006290]	9.4291	0
A_23_P332399	NM_016315	GULP1	Homo sapiens GULP, engulfment adaptor PTB domain containing 1 (GULP1), mRNA [NM_016315]	47.756	0
